# Supplementary material for: Genome-wide transcriptomic analysis reveals insights into the response to Citrus bark cracking viroid (CBCVd) in hop (Humulus lupulus L.)
Source: Preprints.org preprint supplement (doi:10.20944/preprints201809.0553.v1), 2018-09-28
Supplement: Supplementary file 1 [file Table S1.docx]

**Table S1:** Primers used for CBCVd-detection and qRT-PCR analysis

| **Primer Name** | **Gene name** | **Sequence (5' - 3')** | **Purpose** |
| --- | --- | --- | --- |
| CVdRT-F | CBCVd | GGGGAAATCTCTTCAGAC | RT-PCR detection |
| CVdRT-R | CBCVd | GGGGATCCCTCTTCAGGT | RT-PCR detection |
| CVdCS-PS | CBCVd | GATCCCTCTTCAGGTATGTTCCCTCCTC | cDNA Synthesis |
| CVdCS-MS | CBCVd | GGATCCCCGGGGAAATCTCTTCAG | cDNA Synthesis |
| CVdQRT-F | CBCVd | TCACTGGCGTCCAGCACC | qRT-PCR |
| CVdQRT-R | CBCVd | AGGAAGAAGCGACGATCGG | qRT-PCR |
| 7SL RNA-F | 7SL RNA gene | TGTAACCCAAGTGGGGG | qRT-PCR |
| 7SL RNA-R | 7SL RNA gene | GCACCGGCCCGTTATCC | qRT-PCR |
| TRP-F | TMV resistance protein | GAGAGGAGAAGAGATTTCCAAAGC | qRT-PCR |
| TRP-R | TMV resistance protein | GCTTCAGTTAGAGCACTCCTC | qRT-PCR |
| PRP1-F | Pathogenesis-related protein 1 | TTATGGCGAGAACATTGCGT | qRT-PCR |
| PRP1-R | Pathogenesis-related protein 1 | CACCACCTGAGTGTAGTGC | qRT-PCR |
| NAC-F | NAC transcription factor 29 | ACCCATCCTGAGAAACTTCC | qRT-PCR |
| NAC-R | NAC transcription factor 29 | TTGCTTTCCATTGACCATGACC | qRT-PCR |
| DZF-F | Dof zinc finger protein | ACTCATCCAACACAAAGTTCTG | qRT-PCR |
| DZF-R | Dof zinc finger protein | GTGGTTGATTTCTTGGCGC | qRT-PCR |
| MLP-F | MLP-like protein 423 | AATCTCATGCAGATAAGGTTTGGG | qRT-PCR |
| MLP-R | MLP-like protein 423 | TGTAGCAGATCTCCTTCTATGAC | qRT-PCR |
| GTE-F | GTE7-transcriptional factor | CGTCGTCGATCAATCATCGG | qRT-PCR |
| GTE-R | GTE7-transcriptional factor | CGCTTCAAACCAGATTTCTTCC | qRT-PCR |
| BRP-F | Brassinosteroid-regulated protein bru1 | AACAAGGCCAGCTTCTTTCTC | qRT-PCR |
| BRP-R | Brassinosteroid-regulated protein bru1 | GTTCTCTGTTTCCCTTGCCT | qRT-PCR |
| AP2-F | AP2-like ethylene-responsive transcription factor | AGAAGAGAAGAAGGAAATGGAGG | qRT-PCR |
| AP2-R | AP2-like ethylene-responsive transcription factor | GTACTCAATTGCTGCCATGTC | qRT-PCR |
| PNM-F | Phosphomethylethanolamine N-methyltransferase | CTGATTTGAACATCTCTGAAGGG | qRT-PCR |
| PNM-R | Phosphomethylethanolamine N-methyltransferase | ATCTTGGCTCACGGTAATGG | qRT-PCR |
| AUX-F | Auxin efflux carrier component | AGTAGTAAAGGGAGTTATGGTTGG | qRT-PCR |
| AUX-R | Auxin efflux carrier component | GACGACCGAAGACTGAACGA | qRT-PCR |
| SFH-F | S-formylglutathione hydrolase | TGATTGCTCCTGACACATCTC | qRT-PCR |
| SFH-R | S-formylglutathione hydrolase | CATACATACGCCAGTTCTTCC | qRT-PCR |
| BEL-F | Homeobox protein BEL1 | TTTACAACTGGGATTTCGGA | qRT-PCR |
| BEL-R | Homeobox protein BEL1 | ATACTCATCACGAGAACTACTAGG | qRT-PCR |
| CHS_H1-F | Chalcone synthase | ATCACTGCCGTCACTTTC | qRT-PCR |
| CHS_H1-R | Chalcone synthase | AAATAAGCCCAGGAACATC | qRT-PCR |
| OMT1-F | O*-*methyltransferases 1 | TAAAGGAACAGTGGTGGACGTTG | qRT-PCR |
| OMT1-R | O*-*methyltransferases 1 | ACCGCATCAGCACTAGGAATTGA | qRT-PCR |
| VPS-F | Valerophenone synthase 1 | GTTATGCCGGTGGAAAA | qRT-PCR |
| VPS-R | Valerophenone synthase 1 | CCGGCTTCCGTTACG | qRT-PCR |
| PAL-F | Phenylalanine ammonia lyase | CCGAAGTCTTGTCAGCCATT | qRT-PCR |
| PAL-R | Phenylalanine ammonia lyase | TGGGGTGATGTCCTAAGAGC | qRT-PCR |
| *Hl*WRKY1-F | WRKY1 transcriptional factor | AGATTGATCAGAGCTCCGACAGT | qRT-PCR |
| *Hl*WRKY1-R | WRKY1 transcriptional factor | CTTCCTCCATCTATAGCCATCATC | qRT-PCR |
| *Hl*WDR1-F | WDR1 transcriptional factor | TTGCTTAGATTGGCTTGGAATAA | qRT-PCR |
| *Hl*WDR1-R | WDR1 transcriptional factor | CCGGCTGAGCAGATATGTCTAT | qRT-PCR |
| *Hl*Myb2-F | MYB2 transcriptional factor | TAGTGGGTCAGAGTACAGTGCTCAT | qRT-PCR |
| *Hl*Myb2-R | MYB2 transcriptional factor | CAACCTCGAGAAGCTGCTGATA | qRT-PCR |
| *Hl*Myb3-F | MYB3 transcriptional factor | GACGTCAACAGCAAGCAATTC | qRT-PCR |
| *Hl*Myb3-R | MYB3 transcriptional factor | GGCCTCTGACGTGTCTGATG | qRT-PCR |
| GAPDH-F | Glyceraldehyde 3-phosphatedehydrogenase | ACCGGAGCCGACTTTGTTGTTG | qRT-PCR |
| GAPDH-R | Glyceraldehyde 3-phosphatedehydrogenase | TCGTACTCTGGCTTGTATTCCTTC | qRT-PCR |
