# Supplementary material for: Genome-wide transcriptomic analysis reveals insights into the response to Citrus bark cracking viroid (CBCVd) in hop (Humulus lupulus L.)
Source: Preprints.org preprint supplement (doi:10.20944/preprints201809.0553.v1), 2018-09-28
Supplement: Supplementary file 3 [file Table S2.xlsx]

## Sheet: Sheet1
Table S2. Correlation analysis of sequencing libraries
mRNA in RNA-Seq libraries:
	Mock1	Mock2	Mock3	Mock4	CBCVd1	CBCVd2	CBCVd3	CBCVd4
Mock1	1	0.97	0.98	0.98	0.91	0.88	0.89	0.87
Mock2	0.97	1	0.97	0.99	0.9	0.87	0.88	0.87
Mock3	0.98	0.97	1	0.98	0.88	0.91	0.9	0.88
Mock4	0.98	0.99	0.98	1	0.89	0.91	0.88	0.89
CBCVd1	0.91	0.9	0.88	0.89	1	0.99	0.98	0.98
CBCVd2	0.88	0.87	0.91	0.91	0.99	1	0.98	0.99
CBCVd3	0.89	0.88	0.9	0.88	0.98	0.98	1	0.98
CBCVd4	0.87	0.87	0.88	0.89	0.98	0.99	0.98	1
