# Supplementary material for: Genome-wide transcriptomic analysis reveals insights into the response to Citrus bark cracking viroid (CBCVd) in hop (Humulus lupulus L.)
Source: Preprints.org preprint supplement (doi:10.20944/preprints201809.0553.v1), 2018-09-28
Supplement: Supplementary file 5 [file Table S3.xls]

## Sheet: UP-regulated
Table S3: The unigenes differentially expressed between the mock-inoculated and CBCVd-infected hop.
Feature ID	Annotations	P-value	Fold change	Control (FPKM)	Infected (FPKM)
HL.SW.v1.0.G000018	cationic amino acid transporter 2	1.28409e-35	4.4101	4.36477	20.5295
HL.SW.v1.0.G000065	ABC transporter G family member 32	6.97026e-13	3.95734	1.77816	7.56467
HL.SW.v1.0.G000106	S-adenosylmethionine synthase 1	5.86461e-59	416.511	0	14.2335
HL.SW.v1.0.G000125	heterogeneous nuclear ribonucleo F	7.95527e-12	2.32178	5.68567	14.0465
HL.SW.v1.0.G000163	c2h2-like zinc finger protein	2.78536e-05	2.0786	3.00714	6.6643
HL.SW.v1.0.G000206	tetraspanin-3-like	0.000518808	7.86578	0.0909852	0.994469
HL.SW.v1.0.G000207	tRNA-splicing endonuclease subunit Sen2-1-like	5.30329e-05	2.20968	2.40689	5.68334
HL.SW.v1.0.G000238	hypothetical protein L484_021269	2.77884e-07	2.75865	2.07801	6.13768
HL.SW.v1.0.G000247	probable alpha-galactosidase B	1.7461e-10	2.17234	6.03861	13.9501
HL.SW.v1.0.G000254	5 -nucleotidase surE	5.11677e-12	23.9348	0.0839186	2.9147
HL.SW.v1.0.G000258	lipase	0.000469786	3.09637	0.737045	2.4915				U
HL.SW.v1.0.G000262	transcription factor vip1	0.000112228	3.87501	0.528136	2.26811
HL.SW.v1.0.G000266	Patatin group A-3	1.6954e-14	95.3496	0	3.23092
HL.SW.v1.0.G000278	Serine protease inhibitor	2.94428e-18	8.97684	0.644454	6.40845
HL.SW.v1.0.G000290	mannitol dehydrogenase	3.05183e-05	19.8141	0.0196633	1.05682
HL.SW.v1.0.G000309	linoleate 13S-lipoxygenase 2-1, chloroplastic-like	1.89774e-27	4.09998	3.79784	16.6187
HL.SW.v1.0.G000330	serine threonine- kinase ACR4	2.36866e-07	5.74467	0.481413	3.0928
HL.SW.v1.0.G000341	probable ATP-dependent DNA helicase DDX11	0.00012112	7.77453	0.134198	1.33893
HL.SW.v1.0.G000353	Polyol transporter 5	2.62411e-40	2.86402	12.3025	37.4295
HL.SW.v1.0.G000358	serine protease inhibitor	9.53713e-07	43.239	0	1.4475
HL.SW.v1.0.G000366	Endochitinase 1	4.85279e-210	14.1405	20.3732	305.981
HL.SW.v1.0.G000378	plant T8M16-80	0.000214585	2.19597	2.03472	4.78048
HL.SW.v1.0.G000381	L-type lectin-domain containing receptor kinase -like	2.55586e-08	2.32624	3.77993	9.36816
HL.SW.v1.0.G000431	cysteine proteinase inhibitor 5	8.30241e-16	2.88391	4.45017	13.6741
HL.SW.v1.0.G000433	mo25-like protein at5g47540	0.000729957	2.59366	1.06359	2.97987
HL.SW.v1.0.G000434	cytochrome b561 and DOMON domain-containing At5g47530-like	1.10027e-22	12.4782	0.509828	7.14058
HL.SW.v1.0.G000593	GATA transcription factor 24-like	6.21111e-10	2.66664	3.23684	9.21428
HL.SW.v1.0.G000619	NAC domain-containing 37 isoform X2	0.00195314	12.8167	0.0183535	0.65391
HL.SW.v1.0.G000624	ribosomal RNA processing 36 homolog	2.27991e-12	2.83749	3.50774	10.6162
HL.SW.v1.0.G000628	geraniol 8-hydroxylase-like	0.00131228	7.72893	0.102873	1.07433
HL.SW.v1.0.G000711	probable UDP-N-acetylglucosamine--peptide N-acetylglucosaminyltransferase SEC	0.00119329	3.5066	0.482577	1.87942
HL.SW.v1.0.G000744	F-box kelch-repeat At3g61590	0.000440002	2.21868	1.77382	4.21574
HL.SW.v1.0.G000758	zinc transporter 4, chloroplastic-like	0.000271554	3.71819	0.546364	2.24493
HL.SW.v1.0.G000780	1-acyl-sn-glycerol-3-phosphate acyltransferase 2	1.03782e-07	4.42286	0.806848	3.90038
HL.SW.v1.0.G000786	histidine methyltransferase 1 homolog isoform X2	9.88665e-05	2.7037	1.25857	3.66975
HL.SW.v1.0.G000898	probably inactive leucine-rich repeat receptor kinase IMK2	3.14593e-21	9.35602	0.735062	7.58181
HL.SW.v1.0.G000914	homeobox-leucine zipper HOX11-like	0.000116173	4.14323	0.451627	2.09192
HL.SW.v1.0.G000928	glycerol-3-phosphate dehydrogenase [NAD(+)] GPDHC1, cytosolic	0.000116848	4.63231	0.379522	1.98875
HL.SW.v1.0.G000932	cytochrome P450 81E8-like	5.96081e-08	50.9968	0	1.71281
HL.SW.v1.0.G000949	chitinase-like protein 1	1.03648e-15	2.19678	9.21354	21.5092
HL.SW.v1.0.G001027	probable acyl-activating enzyme 5, peroxisomal	6.50585e-09	3.6325	1.38967	5.44407
HL.SW.v1.0.G001043	organic cation carnitine transporter 7-like	2.82912e-06	5.71846	0.38093	2.46914
HL.SW.v1.0.G001097	Selenium-binding 2	4.6704e-42	8.93588	1.58489	15.2927
HL.SW.v1.0.G001151	Subtilisin-like protease	1.12985e-13	3.60164	2.29914	8.87206
HL.SW.v1.0.G001162	dual specificity phosphatase 1 isoform X1	5.7185e-07	44.5877	0	1.49305
HL.SW.v1.0.G001295	casein kinase 1 HD16	0.00195314	21.5448	0	0.703525
HL.SW.v1.0.G001312	ureidoglycolate hydrolase	8.95636e-09	2.39395	3.66053	9.33906
HL.SW.v1.0.G001324	eukaryotic peptide chain release factor subunit 1-3	8.20739e-08	2.6902	2.32432	6.68786
HL.SW.v1.0.G001327	magnesium transporter NIPA8	0.000271554	3.60773	0.562062	2.23769
HL.SW.v1.0.G001328	glycerol-3-phosphate transporter 1	0.00202418	19.8374	0	0.644923
HL.SW.v1.0.G001385	equilibrative nucleotide transporter 1	1.17886e-12	18.7324	0.137568	3.33807
HL.SW.v1.0.G001398	Detoxification 12-like	0.000855466	5.47699	0.192404	1.27205
HL.SW.v1.0.G001403	probable histone chaperone ASF1A	5.48001e-14	3.00449	3.55515	11.389
HL.SW.v1.0.G001465	TMV resistance N-like	3.05183e-05	32.6953	0	1.08564
HL.SW.v1.0.G001479	Cysteine-rich receptor kinase 10	0.00106506	3.10338	0.599449	2.04514
HL.SW.v1.0.G001543	BES1 BZR1 homolog 2	9.2485e-06	4.4048	0.526578	2.57761
HL.SW.v1.0.G001545	probable NAD(P)H dehydrogenase (quinone) FQR1-like 2	1.46163e-48	4.45647	5.89967	28.0043
HL.SW.v1.0.G001546	Major facilitator superfamily isoform 1	0.00140276	2.70257	0.827789	2.42982
HL.SW.v1.0.G001547	probable Xaa-Pro aminopeptidase P	3.54295e-09	6.11804	0.554156	3.76973
HL.SW.v1.0.G001573	7-dehydrocholesterol reductase	0.000533537	5.35898	0.236184	1.48972
HL.SW.v1.0.G001577	methyltransferase DDB_G0268948	4.53305e-37	12.1361	0.905954	12.0357
HL.SW.v1.0.G001624	auxin-binding ABP19a	1.42204e-130	2.90192	40.3427	124.199
HL.SW.v1.0.G001626	MOB kinase activator-like 1A	3.38606e-06	4.36825	0.617938	2.97915
HL.SW.v1.0.G001647	acidic endochitinase-like	6.60442e-05	10.615	0.0976731	1.42816
HL.SW.v1.0.G001659	Aquaporin TIP1-3	7.12873e-21	2.85166	6.22916	18.9015
HL.SW.v1.0.G001669	chlorophyllase-1	5.64782e-06	11.1204	0.116482	1.72063
HL.SW.v1.0.G001681	MATH domain and coiled-coil domain-containing At3g58370-like	1.5498e-06	19.6053	0.0479606	1.63236
HL.SW.v1.0.G001692	succinate-semialdehyde dehydrogenase, mitochondrial isoform X1	1.9005e-13	3.59567	2.25013	8.66796
HL.SW.v1.0.G001698	TVP38 TMEM64 family membrane slr0305	6.4556e-06	3.07216	1.22282	4.05428
HL.SW.v1.0.G001700	O-methyltransferase 7	2.44183e-63	2.099	46.1059	102.672
HL.SW.v1.0.G001739	Phenylalanine ammonia-lyase	4.66612e-23	6.48107	1.41793	9.93716
HL.SW.v1.0.G001749	probable phytol kinase 3, chloroplastic	2.88856e-06	2.82635	1.5961	4.84555
HL.SW.v1.0.G001779	probable linoleate 9S-lipoxygenase 5	2.72705e-10	6.14056	0.615904	4.18507
HL.SW.v1.0.G001785	DOWNY MILDEW RESISTANCE 6	8.15137e-11	2.9343	2.75307	8.63414
HL.SW.v1.0.G001787	glycine--tRNA ligase, mitochondrial 1	5.94788e-05	5.8925	0.25926	1.78924
HL.SW.v1.0.G001863	Acyl- N-acyltransferases (NAT) superfamily ,	0.000132917	2.33497	1.82756	4.57054
HL.SW.v1.0.G001919	ras-related RABH1b	1.31379e-13	2.0247	10.0819	21.6822
HL.SW.v1.0.G001977	UDP-galactose transporter 2	1.88428e-11	2.85103	3.2321	9.83392
HL.SW.v1.0.G002009	ankyrin repeat-containing ITN1-like	1.28811e-08	2.25612	4.2834	10.291
HL.SW.v1.0.G002082	uncharacterized calcium-binding At1g02270 isoform X1	1.19216e-07	47.8381	0	1.60412
HL.SW.v1.0.G002142	autophagy-related 18c-like isoform X1	0.00183108	8.94192	0.0667824	0.904258
HL.SW.v1.0.G002147	L-lactate dehydrogenase B-like	9.51787e-08	3.06469	1.67215	5.50595
HL.SW.v1.0.G002152	dof zinc finger -like	0.00126364	2.52348	1.01268	2.76322
HL.SW.v1.0.G002190	ABC transporter C family member 10-like	6.6648e-14	4.25276	1.67173	7.65101
HL.SW.v1.0.G002201	UDP-glucuronate 4-epimerase 3	0.000144962	11.3393	0.066626	1.15479
HL.SW.v1.0.G002263	chitinase LA-ab , partial	0.0021903	2.51672	0.954767	2.60026
HL.SW.v1.0.G002277	SUMO-conjugating enzyme SCE1	1.33833e-09	2.17388	5.4023	12.4923
HL.SW.v1.0.G002289	transcription factor MYB1R1	1.74163e-17	2.8781	4.97061	15.2367
HL.SW.v1.0.G002323	(R,S)-reticuline 7-O-methyltransferase-like	2.01138e-12	2.81632	3.5832	10.7559
HL.SW.v1.0.G002356	Peroxisomal acyl-coenzyme A oxidase 1	0.000248398	2.16216	2.0986	4.85159
HL.SW.v1.0.G002357	tryptophan aminotransferase-related 2-like	3.27371e-18	4.88822	1.75752	9.24334
HL.SW.v1.0.G002365	anthocyanidin 3-O-glucosyltransferase 2-like	5.12624e-06	3.89191	0.744677	3.17341
HL.SW.v1.0.G002391	4-coumarate-- ligase 1-like	4.32303e-10	7.8894	0.412752	3.68879
HL.SW.v1.0.G002410	Myb-related Zm1	9.99768e-07	16.5359	0.0673108	1.7113
HL.SW.v1.0.G002422	tetraketide alpha-pyrone reductase 2-like	2.9466e-08	2.02026	5.80568	12.4718
HL.SW.v1.0.G002429	syntaxin-71-like	0.000488288	24.6996	0	0.811792
HL.SW.v1.0.G002439	G-type lectin S-receptor-like serine threonine- kinase RLK1	1.31366e-11	2.60241	4.0724	11.2988
HL.SW.v1.0.G002459	anti-virus transcriptional factor	5.37892e-06	4.14744	0.680475	3.09957
HL.SW.v1.0.G002512	ECERIFERUM 1-like	5.77463e-08	29.7429	0.0314747	1.97738
HL.SW.v1.0.G002534	cycloartenol Synthase	1.69995e-05	3.10495	1.11818	3.7542
HL.SW.v1.0.G002561	class III peroxidase	1.37184e-53	3.37418	11.3931	40.8427
HL.SW.v1.0.G002570	protein sulfur deficiency-induced 1	9.15248e-06	3.2673	1.0139	3.59368
HL.SW.v1.0.G002593	Peroxidase 72	7.6296e-05	15.6256	0.0436278	1.22614
HL.SW.v1.0.G002595	bifunctional epoxide hydrolase 2-like	5.07459e-09	3.97343	1.15869	4.98788
HL.SW.v1.0.G002610	lysine histidine transporter 1-like	6.10364e-05	22.2318	0.0119319	1.00808
HL.SW.v1.0.G002635	HYPER-SENSITIVITY-RELATED 4-like	5.91313e-11	3.24598	2.24429	7.80252
HL.SW.v1.0.G002645	probable phosphatase 2C 63	7.55181e-06	2.90662	1.34349	4.20579
HL.SW.v1.0.G002690	FAD-dependent urate hydroxylase-like	5.95083e-14	2.64938	4.7828	13.4979
HL.SW.v1.0.G002726	V-type proton ATPase subunit a1	0.0001276	2.53544	1.46344	3.9892
HL.SW.v1.0.G002745	30S ribosomal S21, chloroplastic-like	1.20966e-25	3.1909	57.6503	195.169
HL.SW.v1.0.G002805	probable E3 ubiquitin- ligase ARI8	0.000426772	2.13124	1.93048	4.40222
HL.SW.v1.0.G002847	EXORDIUM-like	8.68048e-07	13.2181	0.104972	1.88919
HL.SW.v1.0.G002884	stem-specific TSJT1-like	2.90824e-18	5.11715	1.63371	9.0025
HL.SW.v1.0.G002936	phosphoinositide phosphatase SAC1 isoform X1	0.00442512	5.07735	0.17503	1.08312
HL.SW.v1.0.G002957	bifunctional nitrilase nitrile hydratase NIT4A	7.66608e-06	3.71426	0.798171	3.23881
HL.SW.v1.0.G002961	GDSL esterase lipase 1	9.86647e-14	2.49551	5.49212	14.5853
HL.SW.v1.0.G002991	cinnamoyl- reductase-like SNL6	1.2453e-12	4.29205	1.50093	6.94451
HL.SW.v1.0.G003012	12-oxophytodienoate reductase 2-like	1.33607e-12	35.8117	0.0492141	3.05942
HL.SW.v1.0.G003013	nuclease HARBI1	3.84079e-05	2.01235	3.30516	7.08701
HL.SW.v1.0.G003014	phosphatidylinositol 3,4,5-trisphosphate 3-phosphatase and -tyrosine-phosphatase PTEN2A	2.43673e-05	3.27401	0.945882	3.36335
HL.SW.v1.0.G003045	L-type lectin-domain containing receptor kinase -like	0.000182176	4.09525	0.484878	2.21184
HL.SW.v1.0.G003194	(R)-mandelonitrile lyase 1-like	0.00341801	11.3799	0.0401124	0.839401
HL.SW.v1.0.G003197	callose synthase 9	0.0011735	2.08837	1.80375	4.03176
HL.SW.v1.0.G003216	chlorophyll a-b binding of LHCII type 1-like	2.24114e-100	3.38854	959.027	3446.36
HL.SW.v1.0.G003247	basic blue protein	3.39158e-31	4.19829	4.14414	18.5555
HL.SW.v1.0.G003294	probable receptor kinase At4g10390	0.00187829	3.11108	0.529719	1.82022
HL.SW.v1.0.G003312	glucose-6-phosphate isomerase 1, chloroplastic	0.00014224	2.68028	1.26086	3.6418
HL.SW.v1.0.G003354	Purine permease 3	3.9849e-99	2.79871	32.7862	97.3727
HL.SW.v1.0.G003391	cold-regulated 413 plasma membrane 1	1.32346e-13	2.29503	137.287	334.176
HL.SW.v1.0.G003402	transcription factor MYB108-like	0.00390628	18.7365	0	0.607674
HL.SW.v1.0.G003466	non-symbiotic hemoglobin 1	0.00183108	12.1941	0.0388924	0.8879
HL.SW.v1.0.G003482	UDP-glycosyltransferase 73C3-like	0.00371926	3.51372	0.385057	1.51916
HL.SW.v1.0.G003535	delta(14)-sterol reductase	2.37923e-10	2.87648	2.80474	8.62022
HL.SW.v1.0.G003611	26S protease regulatory subunit S10B homolog B	1.94625e-05	2.08238	3.12551	6.93988
HL.SW.v1.0.G003657	myosin IB heavy chain	1.04841e-68	3.5324	11.8373	44.4311
HL.SW.v1.0.G003670	probable xyloglucan endotransglucosylase hydrolase 8	0.00111589	2.10544	1.89002	4.25877
HL.SW.v1.0.G003704	wall-associated receptor kinase 2-like	2.74417e-05	7.02534	0.20321	1.72211
HL.SW.v1.0.G003743	3-ketoacyl- thiolase 2, peroxisomal	6.93895e-08	12.4507	0.137925	2.21032
HL.SW.v1.0.G003772	BTB POZ and MATH domain-containing 4	4.95317e-07	2.77598	1.86812	5.55868
HL.SW.v1.0.G003778	Hypersensitive-induced response 4	1.68423e-21	17.0023	0.315027	6.2204
HL.SW.v1.0.G003783	probable aquaporin PIP2-8	9.30405e-13	5.41061	0.988853	5.82193
HL.SW.v1.0.G003786	phenylalanine ammonia-lyase	0.00012112	8.86543	0.112902	1.32947
HL.SW.v1.0.G003917	ubiquitin-conjugating enzyme E2 27	2.53026e-12	2.16134	7.37198	16.9368
HL.SW.v1.0.G003941	acidic mammalian chitinase-like	1.09677e-05	15.4717	0.0580016	1.44721
HL.SW.v1.0.G003978	probable pectinesterase pectinesterase inhibitor 35	4.1003e-05	2.58187	1.49647	4.14972
HL.SW.v1.0.G003988	auxin-induced 15A-like	6.60442e-05	8.21836	0.13248	1.40167
HL.SW.v1.0.G004004	probable polyamine transporter At3g13620	0.00154392	4.96375	0.234361	1.36856
HL.SW.v1.0.G004019	chitotriosidase-1-like	2.09815e-05	18.5424	0.0383961	1.35659
HL.SW.v1.0.G004037	proteasome subunit beta type-3-A	8.48243e-69	6.33351	30.1253	202.526
HL.SW.v1.0.G004061	N-acylphosphatidylethanolamine synthase	1.52072e-08	2.9045	2.18034	6.77979
HL.SW.v1.0.G004093	Glucan endo-1,3-beta-glucosidase 7	7.40057e-06	2.74908	1.54544	4.56699
HL.SW.v1.0.G004101	receptor kinase At4g00960	1.45538e-11	45.4639	0.0205815	2.51816
HL.SW.v1.0.G004109	beta-amyrin 28-oxidase-like	2.42291e-38	44.3329	0.1734	9.6368
HL.SW.v1.0.G004212	Ubiquitin carboxyl-terminal hydrolase 12	6.76549e-05	2.91354	1.08768	3.42644
HL.SW.v1.0.G004239	citrate synthase, glyoxysomal	2.21273e-19	2.20833	11.3404	26.5961
HL.SW.v1.0.G004241	V-type proton ATPase subunit D	5.82555e-17	2.04436	12.5155	27.1668
HL.SW.v1.0.G004262	2-oxoglutarate-dependent dioxygenase DAO-like	1.44499e-11	4.355	1.32163	6.21863
HL.SW.v1.0.G004270	peroxidase 4-like	1.86959e-58	397.301	0	13.577
HL.SW.v1.0.G004336	Phospholipase A1-IIdelta	3.54295e-09	5.91636	0.570039	3.74134
HL.SW.v1.0.G004342	pathogenesis-related PR-1	0.000728622	34.5521	13.5329	497.007
HL.SW.v1.0.G004344	PREDICTED: uncharacterized protein At2g37660, chloroplastic	5.50501e-06	2.14906	3.14666	7.20997
HL.SW.v1.0.G004391	CBL-interacting serine threonine- kinase 4-like	0.000222963	2.37827	1.54416	3.94186
HL.SW.v1.0.G004436	HVA22 f	5.64782e-06	11.4123	0.113391	1.72809
HL.SW.v1.0.G004449	protein root hair defective 3 homolog 2	0.00293515	2.98628	0.54071	1.77978
HL.SW.v1.0.G004457	ACT domain-containing ACR6-like	0.00380182	2.47455	0.895874	2.40165
HL.SW.v1.0.G004466	ethylene-responsive transcription factor WIN1-like	9.17833e-80	215.995	0.0621676	21.582
HL.SW.v1.0.G004488	Tetratricopeptide-like helical	1.01178e-10	3.25598	2.16698	7.55982
HL.SW.v1.0.G004503	50S ribosomal L3, chloroplastic	1.10114e-08	2.17151	122.638	282.463
HL.SW.v1.0.G004536	acetyl- acetyltransferase, cytosolic 1	0.000271554	3.43515	0.602571	2.27883
HL.SW.v1.0.G004584	mitochondrial uncoupling 1	0.00332698	3.43125	0.434319	1.66225
HL.SW.v1.0.G004598	glutathione S-transferase U9-like	6.65343e-201	112.195	0.372397	48.0911
HL.SW.v1.0.G004601	heavy metal-associated isoprenylated plant 24	8.488e-25	162.552	0	5.53373
HL.SW.v1.0.G004657	cationic amino acid transporter 2, vacuolar-like	1.11853e-27	8.70907	1.0506	9.96693
HL.SW.v1.0.G004658	LL-diaminopimelate aminotransferase	3.56546e-47	11.1668	8.03128	95.4428
HL.SW.v1.0.G004723	DNA-binding SMUBP-2	5.73964e-36	245.824	0	8.3894
HL.SW.v1.0.G004744	Monocopper oxidase SKU5	6.6191e-05	5.70364	0.284532	1.883
HL.SW.v1.0.G004755	glutathione S-transferase	2.35277e-10	2.78283	3.01041	8.94952
HL.SW.v1.0.G004852	probable polygalacturonase	1.79007e-38	4.8057	4.03404	20.6937
HL.SW.v1.0.G004874	endoglucanase 6	2.77724e-06	2.08233	3.82771	8.49115
HL.SW.v1.0.G004887	late embryogenesis abundant At1g64065	8.20632e-16	4.32084	1.88656	8.76075
HL.SW.v1.0.G004991	common plant regulatory factor 1-like	4.74383e-07	2.7669	2.01209	5.96511
HL.SW.v1.0.G005009	E3 ubiquitin- ligase RMA1H1-like	7.0259e-05	4.22226	0.45681	2.15449
HL.SW.v1.0.G005143	UDP-sugar transporter DDB_G0278631	2.10356e-06	2.25842	2.99969	7.2307
HL.SW.v1.0.G005188	peptidyl-prolyl cis-trans isomerase CYP18-1	6.93253e-10	2.11155	6.19354	13.9024
HL.SW.v1.0.G005208	phosphoenolpyruvate phosphate translocator 2, chloroplastic-like	1.38464e-08	3.18143	1.78579	6.09844
HL.SW.v1.0.G005230	Eukaryotic translation initiation factor 2 subunit beta	3.10461e-88	2.02106	65.4842	140.38
HL.SW.v1.0.G005285	ACT domain-containing ACR4-like	2.24777e-05	3.87486	0.668881	2.84769
HL.SW.v1.0.G005352	glucan endo-1,3-beta-glucosidase, basic isoform-like	1.71059e-77	17.5267	1.09714	20.9466
HL.SW.v1.0.G005365	NAC domain-containing 2-like	2.87333e-12	3.92123	1.75177	7.38355
HL.SW.v1.0.G005374	plastidal glycolate glycerate translocator 1, chloroplastic	6.98566e-06	2.27514	2.6727	6.4935
HL.SW.v1.0.G005445	cytochrome b5-like	2.02505e-35	3.62591	6.36503	24.5613
HL.SW.v1.0.G005448	indeterminate-domain 2-like	7.73385e-05	2.94412	1.03075	3.28587
HL.SW.v1.0.G005477	5 -3 exoribonuclease 4	0.00338101	2.06951	1.5474	3.43213
HL.SW.v1.0.G005480	cytochrome P450 77A3-like	1.36883e-72	15.5874	1.16639	19.7873
HL.SW.v1.0.G005510	shaggy-related kinase eta isoform X1	5.40215e-66	4.2318	8.07125	36.3312
HL.SW.v1.0.G005555	peroxidase N1-like	1.02001e-38	3.49958	67.9144	252.155
HL.SW.v1.0.G005589	peptidyl-prolyl cis-trans isomerase FKBP18, chloroplastic	1.26907e-11	5.1629	0.975929	5.48385
HL.SW.v1.0.G005605	F-box kelch-repeat OR23	1.78187e-06	2.37811	2.66817	6.77763
HL.SW.v1.0.G005619	Ethylene-responsive transcription factor 1B	1.99795e-12	4.57656	1.27981	6.33752
HL.SW.v1.0.G005620	mitochondrial phosphate carrier 3, mitochondrial-like	0.00390628	19.4531	0	0.632175
HL.SW.v1.0.G005626	1-acylglycerol-3-phosphate O-acyltransferase	2.32861e-11	4.1045	1.41511	6.26284
HL.SW.v1.0.G005666	probable nucleoredoxin 1	3.72891e-154	6.78316	7.04154	50.857
HL.SW.v1.0.G005791	probable E3 ubiquitin- ligase RNF217	6.50668e-09	3.65044	1.38464	5.45145
HL.SW.v1.0.G005874	Beta-glucosidase 42	5.80612e-11	7.2236	0.502803	4.06556
HL.SW.v1.0.G005932	4-coumarate-- ligase 2	1.34336e-17	11.5531	0.433316	5.67134
HL.SW.v1.0.G005933	cinnamoyl- reductase 1-like	2.69412e-24	2.35777	11.9333	29.8806
HL.SW.v1.0.G005948	1-aminocyclopropane-1-carboxylate synthase	4.5895e-07	4.56148	0.671703	3.37067
HL.SW.v1.0.G005965	carotenoid cleavage dioxygenase 1	0.000188882	2.37349	1.69911	4.3253
HL.SW.v1.0.G005982	cationic peroxidase 1-like	2.09815e-05	20.8157	0.0306853	1.35696
HL.SW.v1.0.G005991	probable indole-3-pyruvate monooxygenase YUCCA10	0.00418096	5.58137	0.133593	0.947418
HL.SW.v1.0.G006009	dnaJ homolog subfamily B member 1	0.00288736	2.61343	0.732054	2.08482
HL.SW.v1.0.G006031	3-ketoacyl- synthase 12	3.73442e-27	7.53079	1.31579	10.7278
HL.SW.v1.0.G006043	peroxidase 31-like	0.000176343	2.75523	1.04628	3.11653
HL.SW.v1.0.G006047	X intrinsic	2.53436e-27	80.7914	0.0433284	6.44493
HL.SW.v1.0.G006050	peroxidase 42	8.11519e-113	14.1503	24.7955	372.67
HL.SW.v1.0.G006069	heat stress transcription factor B-3	7.6296e-05	12.7968	0.0601629	1.22095
HL.SW.v1.0.G006097	tropinone reductase homolog isoform X2	3.9216e-16	3.0258	4.0388	13.0226
HL.SW.v1.0.G006130	PREDICTED: uncharacterized protein LOC107407473	5.09079e-10	2.18776	5.53267	12.8784
HL.SW.v1.0.G006132	signal recognition particle 54 kDa 2	1.05092e-08	5.6794	0.56727	3.57863
HL.SW.v1.0.G006174	REF SRPP At3g05500	2.34528e-14	6.72469	0.795103	5.87013
HL.SW.v1.0.G006175	Aspartic ase 2	0.000936275	2.84491	0.823181	2.54575
HL.SW.v1.0.G006202	ankyrin repeat-containing At5g02620-like	4.53122e-18	3.79685	2.83088	11.4911
HL.SW.v1.0.G006259	probable sugar phosphate phosphate translocator At5g25400	0.000149989	2.17423	2.16118	5.02279
HL.SW.v1.0.G006300	BONZAI 3-like	1.13708e-13	88.7679	0	3.00598
HL.SW.v1.0.G006361	ubiquitin-conjugating enzyme E2 variant 1D	1.95559e-131	2.47412	53.8054	141.219
HL.SW.v1.0.G006382	mitochondrial chaperone BCS1-B	5.84953e-07	2.14662	3.85984	8.82372
HL.SW.v1.0.G006415	D-galacturonate reductase-like	3.84804e-79	4.51084	7.8384	37.6183
HL.SW.v1.0.G006424	heptahelical transmembrane 1-like	1.11243e-05	3.55918	0.867313	3.36031
HL.SW.v1.0.G006456	delta(12)-acyl-lipid-desaturase-like	4.1427e-05	2.10114	2.76321	6.19471
HL.SW.v1.0.G006530	pyridoxine pyridoxamine 5 -phosphate oxidase 1, chloroplastic isoform X1	4.69056e-05	2.3395	1.98075	4.96299
HL.SW.v1.0.G006550	late embryogenesis abundant Lea5	9.16829e-15	6.46995	0.840624	5.96175
HL.SW.v1.0.G006571	vacuolar-processing enzyme-like	6.19145e-14	4.82415	1.32997	6.93733
HL.SW.v1.0.G006608	NRT1 PTR FAMILY	0.000524086	2.52253	1.20952	3.28954
HL.SW.v1.0.G006654	bifunctional pinoresinol-lariciresinol reductase 2-like	2.74417e-05	6.71091	0.212762	1.7094
HL.SW.v1.0.G006670	heavy metal-associated isoprenylated plant 3-like	2.44526e-08	2.56926	2.83844	7.78971
HL.SW.v1.0.G006680	probable glucan endo-1,3-beta-glucosidase A6	2.27233e-07	9.85777	0.185044	2.2363
HL.SW.v1.0.G006740	MLP 423	0	85.6279	5.22435	477.309
HL.SW.v1.0.G006772	PREDICTED: uncharacterized protein LOC107431288	2.65992e-05	2.47089	1.79263	4.74676
HL.SW.v1.0.G006778	glutamyl-tRNA reductase-binding , chloroplastic	9.48612e-29	2.50967	12.21	32.5578
HL.SW.v1.0.G006795	AMSH-like ubiquitin thioesterase 3	8.47837e-09	4.68206	0.830428	4.24888
HL.SW.v1.0.G006808	cellulose synthase E1	0.00390628	13.7382	0.0123986	0.616524
HL.SW.v1.0.G006809	transmembrane emp24 domain-containing p24beta2-like	1.47753e-34	2.20423	21.1438	49.469
HL.SW.v1.0.G006827	DETOXIFICATION 24-like	9.4313e-07	6.44565	0.355261	2.61893
HL.SW.v1.0.G006831	probable aspartyl protease At4g16563	4.87399e-06	5.79404	0.366157	2.4134
HL.SW.v1.0.G006856	alpha-1,4-glucan- synthase [UDP-forming] 2	4.32394e-59	6.01178	15.7475	100.58
HL.SW.v1.0.G006862	F-box PP2-B10-like	1.95826e-09	4.6983	0.917645	4.6996
HL.SW.v1.0.G006879	ATP-dependent 6-phosphofructokinase 2	0.000535615	3.00497	0.728052	2.38852
HL.SW.v1.0.G006894	wall-associated receptor kinase-like 1	8.10647e-06	2.72549	1.62719	4.76421
HL.SW.v1.0.G006946	random slug 5	7.6296e-05	14.8402	0.0487341	1.23935
HL.SW.v1.0.G006957	Alkaline ceramidase 3	0.000113079	4.5739	0.347483	1.80684
HL.SW.v1.0.G006993	proteasome assembly chaperone 2	1.19093e-27	3.70728	4.64787	18.3687
HL.SW.v1.0.G007018	transport Sec61 subunit alpha-like	1.28022e-06	2.59714	2.09919	5.83391
HL.SW.v1.0.G007060	GDSL esterase lipase At5g55050-like	1.09136e-08	2.01518	6.11448	13.102
HL.SW.v1.0.G007127	GDSL esterase lipase At5g33370-like	2.11294e-226	490.342	0.177799	109.286
HL.SW.v1.0.G007128	GDSL esterase lipase At5g33370-like	2.36028e-77	195.303	0.0561916	18.2855
HL.SW.v1.0.G007154	aldehyde dehydrogenase family 3 member F1-like	0.00012112	7.58685	0.140681	1.35602
HL.SW.v1.0.G007256	DETOXIFICATION 16-like	7.17532e-18	13.4758	0.356529	5.52509
HL.SW.v1.0.G007294	auxin-responsive SAUR36-like	3.06236e-11	3.79348	1.68837	6.89405
HL.SW.v1.0.G007300	plastidial pyruvate kinase 2	7.71788e-14	2.12203	8.88944	20.0431
HL.SW.v1.0.G007310	glycosyl transferase	1.82027e-20	2.26455	11.3008	27.1885
HL.SW.v1.0.G007318	sec-independent translocase TATB, chloroplastic	9.96225e-23	3.0968	5.55318	18.3065
HL.SW.v1.0.G007349	alanine--glyoxylate aminotransferase 2 homolog 1, mitochondrial	0.00191404	2.85442	0.693214	2.16148
HL.SW.v1.0.G007383	transmembrane 33 homolog	1.09876e-26	2.87245	7.95451	24.2931
HL.SW.v1.0.G007386	cucumisin-like isoform X2	3.58721e-13	2.12006	9.92456	22.358
HL.SW.v1.0.G007400	probable calcium-binding CML43	1.10182e-09	2.19706	5.34462	12.495
HL.SW.v1.0.G007453	Peroxisomal membrane PEX14	3.90769e-19	3.74999	3.06121	12.2647
HL.SW.v1.0.G007478	cytochrome P450 CYP72A219-like	9.83653e-19	3.1581	4.32738	14.5657
HL.SW.v1.0.G007512	CASP 1D1	1.50778e-23	7.58616	1.12411	9.27328
HL.SW.v1.0.G007515	Chitinase 2	2.41214e-06	3.56022	0.992396	3.834
HL.SW.v1.0.G007543	RING FYVE PHD zinc finger superfamily , isoform 1	0.00195314	21.3619	0	0.697011
HL.SW.v1.0.G007611	long-chain-alcohol oxidase FAO1	0.000855466	5.66774	0.193909	1.32605
HL.SW.v1.0.G007626	germin 2-1	2.16362e-22	146.465	0	4.98158
HL.SW.v1.0.G007627	germin subfamily 1 member 13	7.29929e-21	14.3114	0.382404	6.26366
HL.SW.v1.0.G007684	Alpha-L-fucosidase 1	1.90471e-15	3.35792	3.06803	11.0045
HL.SW.v1.0.G007710	Homocysteine S-methyltransferase 2	0.00193744	2.05421	1.72921	3.80269
HL.SW.v1.0.G007711	probable serine threonine- kinase WNK11	1.82323e-08	2.27094	4.05598	9.81249
HL.SW.v1.0.G007767	B-box domain 30	1.85096e-11	2.48404	4.59002	12.1374
HL.SW.v1.0.G007866	AP-4 complex subunit mu	0.000305884	3.18826	0.741756	2.58429
HL.SW.v1.0.G007867	AP-4 complex subunit mu-like	3.66783e-13	6.06365	0.833674	5.52939
HL.SW.v1.0.G007889	UDP-glycosyltransferase 83A1-like	1.53681e-08	18.003	0.0791536	2.09181
HL.SW.v1.0.G007905	phosphoglycolate phosphatase 1B, chloroplastic-like	8.71944e-106	3.39602	23.9742	86.4143
HL.SW.v1.0.G007974	Hydroxyproline-rich glyco family ,	0.000170165	3.84231	0.537723	2.28819
HL.SW.v1.0.G008013	AP-1 complex subunit gamma-2	0.000488288	24.7556	0	0.813666
HL.SW.v1.0.G008035	Glucan endo-1,3-beta-glucosidase, basic vacuolar isoform	1.20981e-68	6.76959	26.5228	190.607
HL.SW.v1.0.G008116	aspartic ase-like	0.00259953	4.06825	0.280884	1.31615
HL.SW.v1.0.G008119	DNA-damage-repair toleration DRT100-like	1.05092e-08	6.06039	0.535925	3.61492
HL.SW.v1.0.G008136	probable polygalacturonase	5.26568e-08	5.44812	0.559419	3.38373
HL.SW.v1.0.G008172	probable CCR4-associated factor 1 homolog 11	1.85814e-72	4.00693	10.0346	42.7307
HL.SW.v1.0.G008190	calmodulin-binding 60 A	1.21713e-10	5.80009	0.721929	4.60796
HL.SW.v1.0.G008243	Replication factor C subunit 3	7.6296e-05	12.936	0.0612566	1.24769
HL.SW.v1.0.G008271	proteasome subunit alpha type-7	1.24675e-60	2.55621	24.9349	67.6467
HL.SW.v1.0.G008392	probable xyloglucan endotransglucosylase hydrolase 23	0.00257687	5.35235	0.176208	1.15064
HL.SW.v1.0.G008500	endochitinase EP3	5.60297e-161	7.53555	6.44841	51.7506
HL.SW.v1.0.G008597	SNF1-related kinase regulatory subunit gamma-like PV42a	0.00390628	18.9823	0	0.615342
HL.SW.v1.0.G008599	triacylglycerol lipase,	3.81482e-06	39.3916	0	1.31533
HL.SW.v1.0.G008622	3-hydroxy-3-methylglutaryl-coenzyme A reductase 1-like	1.06091e-42	4.88278	4.39211	22.8802
HL.SW.v1.0.G008633	probable transaldolase	1.57403e-14	2.38413	6.65977	16.8833
HL.SW.v1.0.G008634	probable trehalose-phosphate phosphatase F	1.94172e-06	7.6993	0.242664	2.2114
HL.SW.v1.0.G008635	glutamine--fructose-6-phosphate aminotransferase [isomerizing] 2-like	3.19998e-05	2.16969	2.52176	5.84228
HL.SW.v1.0.G008669	serine threonine- kinase CDL1-like isoform X1	3.16484e-06	2.57836	2.01416	5.56042
HL.SW.v1.0.G008692	hypothetical protein PRUPE_8G234100	0.000855466	5.66125	0.186913	1.284
HL.SW.v1.0.G008695	Annexin D5	1.52592e-05	34.19	0	1.13659
HL.SW.v1.0.G008738	probable plastidic glucose transporter 2	1.10023e-07	2.74667	2.19128	6.44355
HL.SW.v1.0.G008754	transcription factor MYB44-like	9.7419e-36	5.2012	3.10072	17.2397
HL.SW.v1.0.G008808	F-box LRR-repeat 4	0.00445459	2.97464	0.56676	1.85543
HL.SW.v1.0.G008838	pathogenesis-related PR-4-like	1.6628e-12	10.1841	0.336656	3.95439
HL.SW.v1.0.G008875	luminal-binding 5	3.06099e-29	2.02068	23.3903	50.1551
HL.SW.v1.0.G008877	Hop-interacting THI002	0.000141981	3.48981	0.674936	2.58316
HL.SW.v1.0.G008912	thiol-disulfide oxidoreductase LTO1-like	3.65875e-09	7.28111	0.404151	3.33481
HL.SW.v1.0.G008950	embryo-specific ATS3B-like	5.37881e-27	2.15108	17.5146	39.9933
HL.SW.v1.0.G009073	polyadenylate-binding RBP47B isoform X1	0.00183108	7.46404	0.0836069	0.882049
HL.SW.v1.0.G009090	probable sugar phosphate phosphate translocator At5g04160	0.00432416	2.54325	0.728108	2.01806
HL.SW.v1.0.G009147	transmembrane ,	7.6296e-05	19.3586	0.0289121	1.22455
HL.SW.v1.0.G009153	COP9 signalosome complex subunit 5b-like	7.72609e-09	2.24248	4.49827	10.7426
HL.SW.v1.0.G009163	CBL-interacting serine threonine- kinase 6	4.37028e-15	2.69731	5.07604	14.5795
HL.SW.v1.0.G009174	glyceraldehyde-3-phosphate dehydrogenase, cytosolic	0.00109016	2.43113	1.20531	3.15904
HL.SW.v1.0.G009201	probable sugar phosphate phosphate translocator At3g11320	0.00176929	2.54785	0.902018	2.49107
HL.SW.v1.0.G009230	probable carboxylesterase SOBER1-like	1.93559e-53	3.66708	9.52081	37.1141
HL.SW.v1.0.G009231	probable carboxylesterase SOBER1-like	7.82253e-57	2.42257	27.047	69.5341
HL.SW.v1.0.G009293	glutamate decarboxylase 4	4.00555e-05	15.2012	0.0479858	1.2625
HL.SW.v1.0.G009352	pathogenesis-related 3	0.000244144	27.1526	0	0.896115
HL.SW.v1.0.G009400	NAC domain-containing 78	0.000207446	2.14682	2.17388	4.98906
HL.SW.v1.0.G009430	COMPASS-like H3K4 histone methylase component WDR5B	0.000452227	2.39361	1.40543	3.61619
HL.SW.v1.0.G009474	glucan endo-1,3-beta-glucosidase 7-like	1.8155e-32	2.15989	21.1361	48.4527
HL.SW.v1.0.G009501	pathogenesis-related 1-like	3.56994e-91	14.9722	1.54498	25.0088
HL.SW.v1.0.G009526	Universal stress A	9.24841e-39	3.52733	7.43072	27.8689
HL.SW.v1.0.G009568	cytochrome P450 86A22-like	9.25336e-50	31.0401	0.343534	12.3299
HL.SW.v1.0.G009649	NAC domain-containing 100	9.4353e-07	2.76464	1.89513	5.61657
HL.SW.v1.0.G009685	lipid transfer	5.15713e-233	323.899	0.29095	110.985
HL.SW.v1.0.G009722	dihydrolipoyllysine-residue acetyltransferase component 5 of pyruvate dehydrogenase complex, chloroplastic	0.000223107	2.4128	1.52866	3.95876
HL.SW.v1.0.G009745	binding partner of ACD11 1 isoform X1	0.00231576	3.47589	0.40362	1.57246
HL.SW.v1.0.G009754	dof zinc finger -like	2.98037e-06	12.0781	0.0903473	1.53545
HL.SW.v1.0.G009761	GDSL esterase lipase At5g45950	1.3161e-129	26.4681	1.16172	33.4715
HL.SW.v1.0.G009836	probable leucine-rich repeat receptor kinase At5g49770	7.38674e-18	2.75469	5.72394	16.7853
HL.SW.v1.0.G009874	UMP-CMP kinase 3-like	6.94118e-17	2.217	15.2364	35.8848
HL.SW.v1.0.G009935	tropinone reductase homolog	1.28504e-09	9.76463	0.279468	3.19427
HL.SW.v1.0.G010065	GDP-mannose 4,6 dehydratase 1	6.00915e-05	2.63686	1.44864	4.10561
HL.SW.v1.0.G010112	F-box kelch-repeat At1g74510	0.00219237	2.1809	1.37349	3.21596
HL.SW.v1.0.G010139	probable LRR receptor-like serine threonine- kinase At1g53430	0.000144962	10.2398	0.0800613	1.18677
HL.SW.v1.0.G010282	probable WRKY transcription factor 75	2.14733e-33	13.254	0.717482	10.501
HL.SW.v1.0.G010331	Momilactone A synthase	0.00418096	6.63953	0.103847	0.924566
HL.SW.v1.0.G010339	probable linoleate 9S-lipoxygenase 5	2.90064e-06	2.95419	1.42353	4.52663
HL.SW.v1.0.G010377	shaggy-related kinase eta	8.66584e-06	2.04353	3.64584	7.93702
HL.SW.v1.0.G010425	Inositol monophosphatase 3	9.33123e-06	2.16967	2.96143	6.85382
HL.SW.v1.0.G010438	non-functional NADPH-dependent codeinone reductase 2-like	2.27765e-33	6.15196	2.27153	14.9937
HL.SW.v1.0.G010478	glutamate dehydrogenase 2	3.1386e-17	9.28365	0.589754	6.09062
HL.SW.v1.0.G010484	Gibberellin 3-beta-dioxygenase 1	2.43673e-05	3.29684	0.928205	3.32457
HL.SW.v1.0.G010499	small ribosomal subunit S13, mitochondrial-like	8.28223e-07	2.11317	3.98477	8.97001
HL.SW.v1.0.G010501	non-functional pseudokinase ZED1-like	1.7291e-22	21.3551	0.242441	6.18853
HL.SW.v1.0.G010522	probable phosphatase 2C 51	0.000533537	4.85487	0.263712	1.48942
HL.SW.v1.0.G010526	formin 20	3.72987e-45	2.03178	36.1143	77.8442
HL.SW.v1.0.G010623	anthocyanidin 3-O-glucosyltransferase 2-like	9.32185e-24	5.02645	2.25031	12.1344
HL.SW.v1.0.G010663	beta-amylase 1, chloroplastic-like	2.79915e-11	2.81453	3.24603	9.7524
HL.SW.v1.0.G010694	IQ domain-containing IQM3-like	8.36521e-06	5.95149	0.34432	2.34161
HL.SW.v1.0.G010739	RING-H2 finger ATL70	3.05183e-05	33.1748	0	1.1023
HL.SW.v1.0.G010745	aquaporin PIP2-7	5.27204e-61	2.26326	35.2553	84.6534
HL.SW.v1.0.G010754	glycerophosphodiester phosphodiesterase GDPDL3-like	2.52285e-05	2.11806	2.84125	6.42029
HL.SW.v1.0.G010841	GDSL esterase lipase At5g45960 isoform X1	0.00341801	9.29293	0.0507445	0.783585
HL.SW.v1.0.G010846	tyrosine decarboxylase 1-like	7.91696e-09	34.7695	0.0272878	2.16574
HL.SW.v1.0.G010870	expansin A10	1.09186e-145	2.00214	99.055	210.343
HL.SW.v1.0.G010888	cyclic nucleotide-gated ion channel 1-like	1.0184e-09	8.6515	0.344605	3.4242
HL.SW.v1.0.G010896	glucosidase 2 subunit beta-like isoform X1	7.0187e-09	3.73387	1.32185	5.32482
HL.SW.v1.0.G010950	probable serine threonine- kinase NAK	5.37892e-06	4.1804	0.668455	3.07371
HL.SW.v1.0.G010962	Reticuline oxidase	0.000533537	5.77263	0.218278	1.50037
HL.SW.v1.0.G010978	cytochrome P450 CYP72A219-like	1.49022e-08	54.7426	0	1.83988
HL.SW.v1.0.G010981	bifunctional epoxide hydrolase 2-like	0.000179998	5.18822	0.266723	1.61037
HL.SW.v1.0.G011010	PREDICTED: uncharacterized protein LOC103339270	1.10385e-11	2.86671	3.28579	10.0524
HL.SW.v1.0.G011028	translocase of chloroplast 34	1.90897e-07	2.10625	4.48365	10.0512
HL.SW.v1.0.G011045	expansin-like B1	3.05183e-05	33.6425	0	1.11792
HL.SW.v1.0.G011048	peptidyl-prolyl cis-trans isomerase	6.72988e-51	2.19494	32.076	74.7054
HL.SW.v1.0.G011059	pathogenesis related PR10	2.0346e-117	11.0402	21.4377	251.31
HL.SW.v1.0.G011063	succinate-- ligase [ADP-forming] subunit beta, mitochondrial	0.00365791	2.62496	0.759325	2.16901
HL.SW.v1.0.G011066	clathrin assembly At5g35200	4.27159e-11	7.98227	0.438556	3.95383
HL.SW.v1.0.G011085	P-loop NTPase domain-containing LPA1 homolog 1-like	0.000606138	3.2223	0.638304	2.25595
HL.SW.v1.0.G011106	F-box At3g07870-like	2.59705e-13	3.48889	2.37913	8.89014
HL.SW.v1.0.G011213	epidermis-specific secreted glyco EP1-like	0.00154392	4.61513	0.247585	1.33573
HL.SW.v1.0.G011218	methyltransferase 13	9.19301e-09	12.216	0.175562	2.66388
HL.SW.v1.0.G011237	boron transporter 4-like	0.00011362	3.12403	0.844557	2.86945
HL.SW.v1.0.G011265	rhomboid 19	1.39694e-05	2.29853	2.4053	5.90764
HL.SW.v1.0.G011270	E3 ubiquitin- ligase ATL6-like	0.00011362	3.1864	0.826554	2.86779
HL.SW.v1.0.G011302	long chain acyl- synthetase 8-like	0.00087794	4.16534	0.362377	1.70929
HL.SW.v1.0.G011307	gibberellin 2-beta-dioxygenase 1-like	0.00234989	5.5106	0.146031	1.00755
HL.SW.v1.0.G011308	ubiquitin-like modifier-activating enzyme 5	7.73833e-05	2.2231	2.17091	5.1605
HL.SW.v1.0.G011310	probable L-type lectin-domain containing receptor kinase	7.6296e-05	13.7255	0.0549404	1.23532
HL.SW.v1.0.G011411	Serine carboxypeptidase-like 7	2.53226e-05	4.61785	0.452306	2.33986
HL.SW.v1.0.G011450	peroxidase 44	1.16686e-45	5.04128	4.17231	22.4373
HL.SW.v1.0.G011457	cytochrome b-c1 complex subunit 8	1.41027e-15	2.615	75.8595	210.419
HL.SW.v1.0.G011463	cytochrome P450 714C2-like	0.000244144	27.1636	0	0.896929
HL.SW.v1.0.G011552	SIP5 isoform X1	9.62598e-08	5.00943	0.630307	3.48268
HL.SW.v1.0.G011616	aquaporin PIP2-1	2.04383e-34	3.28424	7.58649	26.5001
HL.SW.v1.0.G011647	peroxidase 4-like	0.00131228	7.65531	0.105007	1.07999
HL.SW.v1.0.G011693	histone H2AX	9.57178e-17	3.52395	3.00432	11.3165
HL.SW.v1.0.G011712	TORNADO 1	0.00148967	5.0187	0.203631	1.22213
HL.SW.v1.0.G011792	serine threonine phosphatase 2A regulatory subunit B beta-like	0.000508282	3.69981	0.467797	1.92831
HL.SW.v1.0.G011896	glycerophosphodiester phosphodiesterase GDPD6	2.49645e-20	2.96317	5.48287	17.2949
HL.SW.v1.0.G011909	glycerol-3-phosphate 2-O-acyltransferase 6	1.43926e-37	15.7375	0.644174	11.2579
HL.SW.v1.0.G011923	vacuolar sorting-associated 29	5.50438e-23	2.34092	13.7725	34.2248
HL.SW.v1.0.G011966	dynein light chain 2, cytoplasmic	5.31849e-05	2.17511	2.44997	5.69293
HL.SW.v1.0.G012007	deSI At4g17486	2.02346e-07	2.57245	2.53753	6.97962
HL.SW.v1.0.G012014	60S ribosomal L30	5.55991e-22	2.0183	17.2803	37.0237
HL.SW.v1.0.G012048	hydrolase family	3.10259e-12	2.42609	5.14119	13.2768
HL.SW.v1.0.G012092	Cytochrome P450 94A1	0.000324077	4.07669	0.396194	1.81953
HL.SW.v1.0.G012096	uncharacterized N-acetyltransferase p20-like	0.00027717	5.69206	0.212475	1.44202
HL.SW.v1.0.G012153	uncharacterized LOC8262908	0.00040246	7.25506	0.13261	1.23351
HL.SW.v1.0.G012156	ZINC INDUCED FACILITATOR-LIKE 1-like	6.6191e-05	5.24562	0.32258	1.93897
HL.SW.v1.0.G012192	DNA-directed RNA polymerases IV and V subunit 4 isoform X1	0.000167111	2.10538	2.37858	5.35153
HL.SW.v1.0.G012217	Translocation sec62	2.73313e-17	69.6024	0.0246162	4.16615
HL.SW.v1.0.G012219	Ethylene receptor 2	0.000156969	2.26145	1.91799	4.64338
HL.SW.v1.0.G012268	STAY-GREEN LIKE, chloroplastic	6.38999e-21	5.36971	1.71542	9.91641
HL.SW.v1.0.G012273	ATPase ASNA1 homolog	1.06532e-07	3.15648	1.58771	5.3877
HL.SW.v1.0.G012297	probable folate-biopterin transporter 4	0.00183108	8.51024	0.0678194	0.868797
HL.SW.v1.0.G012375	disulfide-isomerase 5-2	0.000198053	3.15723	0.775678	2.67141
HL.SW.v1.0.G012381	zingipain-2-like	1.72544e-14	21.0114	0.148898	3.99891
HL.SW.v1.0.G012423	eukaryotic translation initiation factor 5A	8.33311e-16	2.21983	205.807	484.529
HL.SW.v1.0.G012432	S-acyltransferase 24	0.000451599	2.36892	1.41667	3.60627
HL.SW.v1.0.G012441	SET DOMAIN GROUP 40	9.28146e-07	3.22002	1.31495	4.56726
HL.SW.v1.0.G012491	probable WRKY transcription factor 75	5.63229e-09	13.6418	0.151319	2.62434
HL.SW.v1.0.G012547	CDI	5.71191e-06	2.65257	1.86842	5.31086
HL.SW.v1.0.G012561	Ethylene-responsive transcription factor 4	9.55286e-39	2.06622	29.1285	63.8558
HL.SW.v1.0.G012593	outer envelope 64, chloroplastic	4.43414e-07	7.35042	0.29422	2.51025
HL.SW.v1.0.G012618	developmental SEPALLATA 2-like	0.00259953	3.96566	0.279916	1.27876
HL.SW.v1.0.G012624	Translation initiation factor IF-2, isoform 1	9.0415e-10	2.13826	5.78969	13.1665
HL.SW.v1.0.G012676	probable S-acyltransferase 7	3.23542e-07	2.37567	3.04672	7.72228
HL.SW.v1.0.G012753	Proteasome subunit beta type-6	6.13712e-33	2.71132	146.691	421.83
HL.SW.v1.0.G012797	cystinosin homolog	2.39045e-122	4.83621	8.80158	45.2768
HL.SW.v1.0.G012813	tropinone reductase homolog	8.96139e-178	11.0429	5.25496	61.8878
HL.SW.v1.0.G012833	UDP-glycosyltransferase 88A1-like	1.53944e-12	3.78515	1.93551	7.86676
HL.SW.v1.0.G012842	K(+) efflux antiporter 3, chloroplastic	1.0738e-13	4.30804	1.63117	7.56476
HL.SW.v1.0.G012881	probable inactive purple acid phosphatase 2	4.76542e-09	2.1447	5.36914	12.2479
HL.SW.v1.0.G012891	ferredoxin--NADP reductase, root isozyme, chloroplastic	3.16471e-26	41.0842	0.118745	6.55476
HL.SW.v1.0.G012936	UDP-glucuronate 4-epimerase 6	1.10909e-33	5.75835	3.15999	19.4543
HL.SW.v1.0.G012949	cysteine protease RD19A-like	2.39036e-22	2.16318	14.1573	32.5128
HL.SW.v1.0.G012968	polyubiquitin isoform X1	3.33696e-13	2.3997	100.447	255.66
HL.SW.v1.0.G013019	aspartate aminotransferase, cytoplasmic	3.18403e-06	4.04477	0.745092	3.30393
HL.SW.v1.0.G013057	ABC transporter C family member 3	5.29801e-06	3.3286	1.06144	3.82614
HL.SW.v1.0.G013097	Proteasome subunit beta type-2-A	4.64502e-15	3.78415	2.29592	9.31116
HL.SW.v1.0.G013126	MITOFERRINLIKE 1, chloroplastic	3.91116e-49	5.31315	4.37952	24.8201
HL.SW.v1.0.G013136	tyrosine aminotransferase-like	0.000469786	2.91975	0.795838	2.52987
HL.SW.v1.0.G013207	GPCR-type G 1	0.000142224	2.60756	1.28966	3.62106
HL.SW.v1.0.G013233	dehydrin Rab18-like	3.55353e-15	98.6563	0	3.34535
HL.SW.v1.0.G013279	glutathione S-transferase U9-like	3.05937e-15	2.24993	8.22702	19.671
HL.SW.v1.0.G013307	(+)-neomenthol dehydrogenase-like	1.94141e-08	16.1924	0.102769	2.28744
HL.SW.v1.0.G013322	L-ascorbate oxidase homolog	6.60442e-05	8.01817	0.142743	1.45308
HL.SW.v1.0.G013373	phosphoenolpyruvate carboxylase kinase 1-like	4.69703e-09	2.36276	3.92232	9.87357
HL.SW.v1.0.G013379	probable mitochondrial-processing peptidase subunit beta, mitochondrial	4.38941e-05	2.76947	1.27523	3.80655
HL.SW.v1.0.G013388	chaperone dnaJ 50	8.70029e-06	4.0247	0.674555	2.98294
HL.SW.v1.0.G013394	transcription factor bHLH35	1.98486e-08	2.61382	2.76124	7.71016
HL.SW.v1.0.G013404	probable dolichyl pyrophosphate Glc1Man9 c2 alpha-1,3-glucosyltransferase	1.29764e-07	2.47064	2.8741	7.58119
HL.SW.v1.0.G013414	Peroxidase 3	1.24808e-08	3.76858	1.21917	4.96479
HL.SW.v1.0.G013425	NAC transcription factor 29-like	3.1966e-66	8.76043	2.31207	21.7423
HL.SW.v1.0.G013500	Solute carrier family 25 member 44	1.43003e-05	5.49328	0.362118	2.26332
HL.SW.v1.0.G013535	2-oxoglutarate (2OG) and Fe(II)-dependent oxygenase superfamily	1.70967e-09	6.51994	0.507051	3.69668
HL.SW.v1.0.G013551	chalcone isomerase	0.00390628	19.7363	0	0.641585
HL.SW.v1.0.G013555	valerophenone synthase, partial	0.000488288	24.2683	0	0.796861
HL.SW.v1.0.G013582	E3 ubiquitin- ligase RING1-like	2.71947e-05	3.39456	0.85729	3.16822
HL.SW.v1.0.G013617	phosphoinositide phosphatase SAC6	3.48567e-14	2.10009	9.51949	21.2418
HL.SW.v1.0.G013645	C2H2L domain class transcription factor	0.00145055	2.86603	0.665378	2.08711
HL.SW.v1.0.G013647	B3 domain-containing transcription factor NGA1-like	6.6639e-22	11.3145	0.58005	7.32056
HL.SW.v1.0.G013648	fusion of histone 2A and enhanced yellow fluorescence	8.31203e-05	3.89677	0.60622	2.60936
HL.SW.v1.0.G013650	vacuolar amino acid transporter 1	0.0037939	2.2436	1.16874	2.82285
HL.SW.v1.0.G013657	peroxidase 73-like	1.17419e-48	4.07665	6.9853	30.3008
HL.SW.v1.0.G013728	diacylglycerol kinase 4-like	0.000677665	2.09612	1.97584	4.42955
HL.SW.v1.0.G013730	hypothetical protein L484_019663	2.29042e-09	2.49139	3.62915	9.63656
HL.SW.v1.0.G013754	F-box PP2-B12	4.18964e-10	2.03354	7.15707	15.4685
HL.SW.v1.0.G013792	cytochrome P450 86A1	0.000244144	14.4574	0.0280246	0.891039
HL.SW.v1.0.G013796	peroxisome biogenesis 19-2	4.64058e-20	6.71559	1.15751	8.44517
HL.SW.v1.0.G013798	glucuronosyltransferase PGSIP8	3.625e-07	5.96316	0.420267	2.8272
HL.SW.v1.0.G013843	Hydroxymethylglutaryl- synthase	6.21256e-07	2.09978	4.14932	9.27643
HL.SW.v1.0.G013974	E3 ubiquitin- ligase ATL41-like	1.31845e-65	16.5255	0.987397	17.8367
HL.SW.v1.0.G014016	xyloglucan endotransglucosylase hydrolase 2-like	1.62432e-06	29.2006	0.192244	5.53319
HL.SW.v1.0.G014072	bifunctional 3-dehydroquinate dehydratase shikimate dehydrogenase, chloroplastic-like isoform X2	0.00231576	3.54322	0.393982	1.56632
HL.SW.v1.0.G014117	Bidirectional sugar transporter N3	2.81807e-19	3.18814	4.35524	14.7965
HL.SW.v1.0.G014144	very-long-chain 3-oxoacyl- reductase 1-like	2.98836e-06	2.3081	2.73785	6.74514
HL.SW.v1.0.G014155	Peroxidase 21	0.00183108	13.8381	0.0320147	0.909218
HL.SW.v1.0.G014163	Xyloglucan endotransglucosylase hydrolase 9	3.13381e-51	3.58425	8.5919	32.7473
HL.SW.v1.0.G014197	dihydrolipoyllysine-residue acetyltransferase component 1 of pyruvate dehydrogenase complex, mitochondrial	3.46569e-06	6.77613	0.262814	2.08538
HL.SW.v1.0.G014212	probable thionin-	4.22798e-05	4.47952	0.447925	2.24557
HL.SW.v1.0.G014258	40S ribosomal SA	0.00219215	2.21519	1.34581	3.20412
HL.SW.v1.0.G014260	Polygalacturonase QRT2	0.00390628	10.4613	0.0243219	0.593436
HL.SW.v1.0.G014330	GDSL esterase lipase At2g04570-like	0	33.4822	11.8848	423.129
HL.SW.v1.0.G014342	small nuclear ribonucleo Sm D2-like	1.17358e-06	2.16418	3.58222	8.25789
HL.SW.v1.0.G014426	diacylglycerol O-acyltransferase 3, cytosolic	1.01966e-20	8.56023	0.787614	7.40429
HL.SW.v1.0.G014567	pathogenesis-related PR-4-like	1.54266e-26	22.1611	0.283133	7.39465
HL.SW.v1.0.G014616	arogenate dehydrogenase 2, chloroplastic	4.0056e-14	10.2996	0.388444	4.56125
HL.SW.v1.0.G014617	serine threonine- kinase rio2	1.18672e-09	4.70653	0.929968	4.76838
HL.SW.v1.0.G014642	mitochondrial succinate-fumarate transporter 1	5.78615e-06	2.21535	2.89559	6.84585
HL.SW.v1.0.G014674	probable disulfide-isomerase A6	2.30186e-20	2.68161	6.99075	19.9397
HL.SW.v1.0.G014745	acid beta-fructofuranosidase-like	1.03274e-08	7.18465	0.385953	3.15373
HL.SW.v1.0.G014763	ankyrin repeat-containing At5g02620-like	0.000536878	2.2457	1.6019	3.85953
HL.SW.v1.0.G014778	ETHYLENE INSENSITIVE 3-like 3	0.00210247	3.40034	0.456583	1.72869
HL.SW.v1.0.G014796	probable glutathione S-transferase	9.0446e-101	3.11034	37.0921	122.408
HL.SW.v1.0.G014802	nuclear transcription factor Y subunit A-1-like	3.28474e-11	7.07895	0.525413	4.15121
HL.SW.v1.0.G014839	(S)-ureidoglycine aminohydrolase	0.00463717	2.04977	1.51377	3.32668
HL.SW.v1.0.G014849	PREDICTED: uncharacterized protein LOC18605980	1.0123e-75	2.67487	27.9268	79.2669
HL.SW.v1.0.G014904	ethylene-responsive transcription factor RAP2-7-like isoform X2	0.00365791	2.61722	0.767737	2.18695
HL.SW.v1.0.G014991	heat shock 83	3.76101e-05	3.14735	0.959243	3.27557
HL.SW.v1.0.G014996	Calcium-transporting ATPase 10, plasma membrane-type	0.000518808	13.5586	0.0401356	1.00668
HL.SW.v1.0.G015043	WRKY transcription factor WRKY24-like	5.28815e-10	2.07731	6.54899	14.4635
HL.SW.v1.0.G015063	hydrolase, hydrolyzing O-glycosyl compounds,	6.58796e-10	2.09628	6.33499	14.1203
HL.SW.v1.0.G015102	tyrosine decarboxylase 1-like	2.98037e-06	21.6514	0.0384309	1.59046
HL.SW.v1.0.G015105	BONZAI 3-like	0.00133998	2.0479	1.8676	4.09141
HL.SW.v1.0.G015201	long chain base biosynthesis 1-like	3.39549e-05	6.98741	0.222761	1.85256
HL.SW.v1.0.G015219	V-type proton ATPase subunit d2	1.08166e-34	2.25907	19.6819	47.1987
HL.SW.v1.0.G015232	dehydrin Rab18-like	2.62122e-38	262.759	0	8.96577
HL.SW.v1.0.G015260	probable glycosyltransferase At5g03795	3.03255e-06	10.6119	0.125363	1.73874
HL.SW.v1.0.G015287	F-box SKP2A	0.000342736	2.11982	2.10977	4.78081
HL.SW.v1.0.G015295	UDP-galactose transporter 1	3.13604e-10	2.87361	2.7007	8.29736
HL.SW.v1.0.G015308	HVA22 e	2.4474e-06	3.07073	1.2987	4.30138
HL.SW.v1.0.G015341	TVP38 TMEM64 family membrane slr0305	1.3493e-09	2.18057	5.36879	12.4536
HL.SW.v1.0.G015349	glyoxylate hydroxypyruvate reductase HPR3-like	1.78833e-22	2.84968	6.70129	20.3165
HL.SW.v1.0.G015360	high mobility group B 9	0.00307329	2.1394	1.37669	3.16146
HL.SW.v1.0.G015478	UDP-arabinose 4-epimerase 1-like	1.90768e-05	2.46242	1.9019	5.01761
HL.SW.v1.0.G015522	probable LRR receptor-like serine threonine- kinase At4g08850	0.00262675	2.18841	1.31133	3.0835
HL.SW.v1.0.G015524	receptor kinase ZAR1	0.00131228	8.02872	0.102967	1.11584
HL.SW.v1.0.G015595	probable inactive receptor kinase At5g58300	0.00087794	4.19306	0.361042	1.71506
HL.SW.v1.0.G015615	pyrrolidone-carboxylate peptidase	1.86357e-114	3.66729	22.784	88.7058
HL.SW.v1.0.G015697	SH3 domain-containing 1	0.000533537	4.9085	0.266921	1.52407
HL.SW.v1.0.G015758	Receptor kinase THESEUS 1	0.0031854	2.38313	0.967444	2.49203
HL.SW.v1.0.G015810	beta-glucosidase 12-like	1.00095e-61	14.8901	1.11804	18.1268
HL.SW.v1.0.G015840	peroxidase 12	6.60442e-05	9.25266	0.118157	1.43979
HL.SW.v1.0.G015862	serine carboxypeptidase-like 50	9.73349e-21	2.38155	9.84612	24.9223
HL.SW.v1.0.G015871	polypyrimidine tract-binding homolog 3 isoform X1	0.00040246	6.57863	0.143609	1.19181
HL.SW.v1.0.G015913	3-phosphoshikimate 1-carboxyvinyltransferase 2	1.39013e-05	2.3564	2.20332	5.55279
HL.SW.v1.0.G015959	osmotin	0.000179998	5.76812	0.236142	1.60515
HL.SW.v1.0.G016056	ZINC INDUCED FACILITATOR-LIKE 1-like isoform X2	0.00418096	5.99401	0.127188	0.981022
HL.SW.v1.0.G016173	probable LRR receptor-like serine threonine- kinase At4g26540	0.00332698	3.29833	0.451848	1.65783
HL.SW.v1.0.G016229	enolase 1, chloroplastic	2.47437e-07	3.0199	1.60879	5.22122
HL.SW.v1.0.G016231	Long chain acyl- synthetase 8	6.60442e-05	9.93038	0.109987	1.46224
HL.SW.v1.0.G016305	probable fructokinase-4	2.80233e-84	5.0536	7.08664	38.1255
HL.SW.v1.0.G016319	Vacuolar cation proton exchanger 3	4.43552e-62	8.9295	2.09264	20.0892
HL.SW.v1.0.G016332	BTB POZ and TAZ domain-containing 4	0.00129909	2.5138	1.11897	3.03538
HL.SW.v1.0.G016381	RING-H2 finger ATL11-like	3.39549e-05	6.57738	0.232137	1.8102
HL.SW.v1.0.G016399	protochlorophyllide-dependent translocon component 52, chloroplastic	4.35647e-12	23.0237	0.0989876	3.17712
HL.SW.v1.0.G016413	peroxidase 12	1.90409e-170	10.3526	4.57314	50.5177
HL.SW.v1.0.G016422	60S ribosomal L31	1.44588e-09	3.10799	2.11444	7.03861
HL.SW.v1.0.G016424	Asparagine--tRNA ligase, cytoplasmic 1	0.00365791	2.66694	0.746662	2.1703
HL.SW.v1.0.G016466	wall-associated receptor kinase-like 16	1.52592e-05	34.9376	0	1.16225
HL.SW.v1.0.G016531	3-ketoacyl- synthase 19-like	7.47564e-126	3.43823	27.9449	101.974
HL.SW.v1.0.G016542	NAC domain-containing 83-like	1.43003e-05	5.49115	0.359164	2.24446
HL.SW.v1.0.G016551	ABC transporter B family member 2-like	0.00151376	3.89489	0.334737	1.48127
HL.SW.v1.0.G016583	EXORDIUM-like	0.0040774	3.85163	0.315499	1.38748
HL.SW.v1.0.G016640	3-oxoacyl-[acyl-carrier- ] synthase 3 A, chloroplastic	5.76193e-10	2.10594	6.27948	14.0623
HL.SW.v1.0.G016645	UDP-glucuronate 4-epimerase 1	2.98014e-25	2.382	12.1167	30.6544
HL.SW.v1.0.G016678	cytochrome P450 81E8-like	2.45796e-17	115.205	0	3.9053
HL.SW.v1.0.G016721	nuclear transcription factor Y subunit C-1-like	6.69715e-29	2.6461	10.4977	29.5115
HL.SW.v1.0.G016770	Mitochondrial outer membrane porin of 36 kDa	9.68405e-08	2.24136	3.89396	9.29854
HL.SW.v1.0.G016791	zinc finger WIP3-like	0.00390628	18.0255	0	0.583425
HL.SW.v1.0.G016817	MLO 1	2.76396e-09	3.85925	1.30864	5.45293
HL.SW.v1.0.G016849	peroxisomal membrane PMP22	6.81112e-33	6.58277	2.03329	14.3845
HL.SW.v1.0.G016875	expansin-A4	2.46497e-189	7.03212	8.27763	61.9365
HL.SW.v1.0.G016914	acid phosphatase 1-like	0.000274664	12.1605	0.0549917	1.09158
HL.SW.v1.0.G017039	CASP 2B1	3.85071e-11	4.38812	1.22189	5.80099
HL.SW.v1.0.G017053	dehydrin Rab18-like	2.84275e-14	93.2718	0	3.16105
HL.SW.v1.0.G017054	proteasome subunit alpha type-3	2.15304e-88	2.86294	27.4633	83.4504
HL.SW.v1.0.G017128	lipid transfer	1.51493e-67	2.32235	36.2437	89.3091
HL.SW.v1.0.G017167	Calcium-transporting ATPase 12, plasma membrane-type	0.00371926	3.35254	0.40324	1.51414
HL.SW.v1.0.G017242	diacylglycerol kinase 5-like isoform X1	0.00087794	3.9074	0.388458	1.70992
HL.SW.v1.0.G017294	aspartyl protease family 1-like	6.13987e-08	3.47504	1.36924	5.1304
HL.SW.v1.0.G017302	---NA---	7.89453e-13	7.74728	0.552829	4.77428
HL.SW.v1.0.G017337	Glycylpeptide N-tetradecanoyltransferase 1	6.10364e-05	31.7223	0	1.05248
HL.SW.v1.0.G017349	G-type lectin S-receptor-like serine threonine- kinase At2g19130	0.000729957	2.59079	1.08413	3.03321
HL.SW.v1.0.G017355	shikimate O-hydroxycinnamoyltransferase	1.14168e-22	8.93951	0.847091	8.30608
HL.SW.v1.0.G017435	fasciclin-like arabinogalactan 1	0.000166694	2.66216	1.20084	3.44823
HL.SW.v1.0.G017569	Potassium voltage-gated channel subfamily C member 4	2.83797e-10	26.4561	0.058876	2.52177
HL.SW.v1.0.G017601	non-specific lipid-transfer At2g13820	1.38253e-13	13.5653	0.249013	4.01063
HL.SW.v1.0.G017617	non-specific lipid transfer GPI-anchored 2-like	3.93739e-34	55.8209	0.109194	8.33107
HL.SW.v1.0.G017670	aspartyl protease family 2-like	0.00148967	5.09098	0.202701	1.23328
HL.SW.v1.0.G017671	60S ribosomal L18a	7.92012e-25	3.53567	5.78043	21.7565
HL.SW.v1.0.G017678	reticulon B11	1.80312e-08	5.7627	0.547503	3.50701
HL.SW.v1.0.G017704	RNA-binding 38-like	0.00267059	2.27584	1.16305	2.85118
HL.SW.v1.0.G017710	aldehyde dehydrogenase family 2 member C4-like	0.000535073	4.02199	0.385735	1.74873
HL.SW.v1.0.G017711	multi -bridging factor 1c	3.62101e-08	2.24081	4.05379	9.67646
HL.SW.v1.0.G017783	WAT1-related At4g19185-like	0.00210247	3.73024	0.412215	1.7241
HL.SW.v1.0.G017797	caffeoyl- O-methyltransferase	7.62048e-76	4.24539	23.309	105.051
HL.SW.v1.0.G017816	hypothetical protein COLO4_17867	5.17983e-30	205.954	0	7.03008
HL.SW.v1.0.G017953	Purple acid phosphatase 23	0.00067958	3.40403	0.559452	2.0995
HL.SW.v1.0.G018012	endo-1,3 1,4-beta-D-glucanase-like	6.60442e-05	8.0576	0.13653	1.40852
HL.SW.v1.0.G018027	NRT1 PTR FAMILY -like	4.23088e-15	9.03028	0.532274	5.37135
HL.SW.v1.0.G018060	TOM1 2	1.86139e-20	3.3935	4.10364	14.8519
HL.SW.v1.0.G018108	temperature-induced lipocalin-1	1.24777e-11	2.22712	8.28336	19.5872
HL.SW.v1.0.G018134	glutaredoxin-C6-like isoform X3	0.000150196	2.46947	1.43436	3.80837
HL.SW.v1.0.G018358	splicing factor 3B subunit 4	5.88189e-09	3.28403	1.75169	6.17672
HL.SW.v1.0.G018391	Blue copper	1.40127e-06	10.2106	0.162055	2.06932
HL.SW.v1.0.G018395	galactinol synthase 1	6.48581e-13	5.07977	1.12058	6.17891
HL.SW.v1.0.G018400	GDP-mannose 3,5-epimerase 1	1.696e-07	4.13785	0.844263	3.81094
HL.SW.v1.0.G018404	Endoglucanase 8	1.98278e-35	43.8869	0.160939	8.96996
HL.SW.v1.0.G018405	NRT1 PTR FAMILY	3.35929e-27	2.61498	10.1964	28.3359
HL.SW.v1.0.G018435	RNA-binding 42-like	5.62192e-06	2.05836	3.59602	7.88702
HL.SW.v1.0.G018488	autophagy-related 8f	1.07879e-09	2.16308	144.258	330.973
HL.SW.v1.0.G018489	serine threonine phosphatase 2A 57 kDa regulatory subunit B beta isoform-like	0.00195314	21.3323	0	0.696328
HL.SW.v1.0.G018515	transmembrane 9 superfamily member 10	2.75609e-12	9.31211	0.386604	4.1014
HL.SW.v1.0.G018519	myb-related Myb4-like	3.35534e-05	31.7279	0	1.05195
HL.SW.v1.0.G018522	protochlorophyllide-dependent translocon component 52, chloroplastic-like	5.87843e-05	2.8124	1.15639	3.51193
HL.SW.v1.0.G018540	Inhibitor of trypsin and hageman factor	3.54511e-10	5.29279	0.780661	4.52541
HL.SW.v1.0.G018609	RNA-binding KH domain-containing isoform 1	6.13435e-08	3.98919	0.978603	4.2411
HL.SW.v1.0.G018658	RING finger and transmembrane domain-containing 2	0.000188756	2.31526	1.73448	4.30536
HL.SW.v1.0.G018714	phosphoglycerate mutase 4	0.000106052	3.65432	0.586323	2.36391
HL.SW.v1.0.G018724	GDSL esterase lipase APG	1.29143e-05	5.88864	0.305777	2.07724
HL.SW.v1.0.G018733	Long chain acyl- synthetase 2	1.28504e-09	8.21002	0.338015	3.1917
HL.SW.v1.0.G018745	glycosyltransferase 7	1.42291e-08	2.19068	4.72257	11.0109
HL.SW.v1.0.G018767	leucine-rich repeat-containing DDB_G0290503 isoform X1	1.35527e-22	3.08193	5.61272	18.4127
HL.SW.v1.0.G018858	calcium-binding PBP1-like	1.94671e-08	10.8502	0.191308	2.53639
HL.SW.v1.0.G019037	GTP-binding SAR1A	9.84957e-05	3.50466	0.649137	2.49856
HL.SW.v1.0.G019054	LIM domain-containing WLIM1-like	7.61041e-09	3.00057	2.09043	6.71718
HL.SW.v1.0.G019125	actin-depolymerizing factor 5	1.06257e-16	2.01703	12.8505	27.5236
HL.SW.v1.0.G019172	ras-related Rab7	4.07828e-31	3.14317	7.57129	25.3133
HL.SW.v1.0.G019206	vacuolar sorting-associated 36	0.00108298	2.20828	1.48931	3.53006
HL.SW.v1.0.G019287	homeobox-leucine zipper ATHB-12-like	4.33681e-07	4.04844	0.858529	3.7887
HL.SW.v1.0.G019297	Calcium and calcium calmodulin-dependent serine threonine- kinase	1.26635e-23	2.85792	7.07304	21.5063
HL.SW.v1.0.G019334	3-ketoacyl- synthase 11-like	8.30291e-11	2.85027	2.94958	8.98118
HL.SW.v1.0.G019361	mitochondrial adenine nucleotide transporter ADNT1	3.41415e-18	3.45306	4.23926	15.6065
HL.SW.v1.0.G019365	Mediator of RNA polymerase II transcription subunit 26,	8.91133e-09	2.11422	5.35655	12.0486
HL.SW.v1.0.G019383	wall-associated receptor kinase-like 14	0.000976573	14.6199	0.0172518	0.734695
HL.SW.v1.0.G019404	transcription factor GTE7-like	0.000274664	15.6787	0.0373027	1.12262
HL.SW.v1.0.G019455	MLP 31	4.13443e-108	4.94496	8.66879	45.5815
HL.SW.v1.0.G019487	WALLS ARE THIN 1-like	1.96024e-09	4.44602	0.975069	4.718
HL.SW.v1.0.G019532	U1 small nuclear ribonucleo A-like	2.09946e-11	2.50612	4.37166	11.669
HL.SW.v1.0.G019535	Aquaporin TIP1-1	2.4732e-121	2.73244	40.7453	118.142
HL.SW.v1.0.G019564	annexin RJ4	0.00341801	12.7414	0.0311361	0.824288
HL.SW.v1.0.G019567	Dr1-associated corepressor	2.79714e-27	3.95268	4.04971	17.0759
HL.SW.v1.0.G019568	Cysteine ase inhibitor 12	3.44228e-26	3.82122	34.1712	138.566
HL.SW.v1.0.G019597	peptidyl-prolyl cis-trans isomerase CYP57	0.000910545	4.56003	0.270975	1.43374
HL.SW.v1.0.G019612	histone	4.20409e-06	2.38144	2.388	6.07771
HL.SW.v1.0.G019667	Serine carboxypeptidase-like 34	3.50425e-34	3.77051	5.65288	22.7042
HL.SW.v1.0.G019707	kDa class I heat shock	0.00390628	18.2602	0	0.591339
HL.SW.v1.0.G019743	CASP 1E2	4.99458e-52	2.71075	21.3273	61.3643
HL.SW.v1.0.G019745	non-specific phospholipase C3-like	0.0025633	2.98159	0.572523	1.87781
HL.SW.v1.0.G019756	phosphoglycerate kinase, cytosolic	3.38605e-31	2.26875	17.5151	42.1835
HL.SW.v1.0.G019779	transcription factor TCP9	7.20369e-15	5.15143	1.27446	7.10623
HL.SW.v1.0.G019827	endochitinase EP3-like	1.39233e-40	6.5464	2.51734	17.6652
HL.SW.v1.0.G019915	Vacuolar-sorting receptor 3	2.29109e-11	2.18032	6.63	15.3745
HL.SW.v1.0.G019938	cinnamoyl- reductase-like SNL6	3.28896e-27	11.8899	0.674199	8.87705
HL.SW.v1.0.G020002	germin subfamily 3 member 1	3.73474e-14	2.82443	4.14606	12.4794
HL.SW.v1.0.G020192	chromatin remodeling SHL	3.96984e-18	4.41299	2.12723	10.0729
HL.SW.v1.0.G020201	UDP-glucose 4-epimerase GEPI48	1.52231e-05	4.27628	0.567351	2.685
HL.SW.v1.0.G020232	cytidine deoxycytidylate deaminase family	9.91787e-07	2.00377	4.57724	9.76055
HL.SW.v1.0.G020248	farnesyl diphosphate synthase	1.29061e-29	3.12844	7.25595	24.1436
HL.SW.v1.0.G020255	glyceraldehyde-3-phosphate dehydrogenase GAPCP1, chloroplastic-like	1.42695e-08	4.19964	0.963238	4.40095
HL.SW.v1.0.G020325	lipid phosphate phosphatase 2-like isoform X1	0.00390628	19.3652	0	0.629299
HL.SW.v1.0.G020330	ubiquitin-fold modifier-conjugating enzyme 1	4.57658e-46	2.40512	22.1729	56.6032
HL.SW.v1.0.G020383	peroxisomal adenine nucleotide carrier 1-like	0.000824125	3.09841	0.687108	2.32914
HL.SW.v1.0.G020393	Nuclear-interacting partner of ALK	2.51646e-06	2.29703	2.8028	6.87088
HL.SW.v1.0.G020446	zinc finger ZAT12-like	0.00195314	19.9716	0	0.649553
HL.SW.v1.0.G020451	transcription factor MYC2-like	0.00106506	3.08124	0.595924	2.01947
HL.SW.v1.0.G020478	UDP-D-apiose UDP-D-xylose synthase 2	3.89429e-05	2.21212	2.33134	5.51027
HL.SW.v1.0.G020487	glucose-6-phosphate phosphate translocator 1, chloroplastic-like	1.05639e-13	4.57023	1.44543	7.12782
HL.SW.v1.0.G020550	mannose-1-phosphate guanylyltransferase 1	6.62191e-14	4.54471	1.50607	7.38114
HL.SW.v1.0.G020591	PREDICTED: uncharacterized protein LOC107431221	0.000912262	4.76832	0.286564	1.57866
HL.SW.v1.0.G020657	CBL-interacting serine threonine- kinase 11	2.31632e-32	3.89778	4.96692	20.6313
HL.SW.v1.0.G020660	hydrolase, hydrolyzing O-glycosyl compounds,	9.62339e-08	2.4367	3.10097	8.06314
HL.SW.v1.0.G020686	alpha-farnesene synthase	1.88678e-33	8.20361	1.46409	12.9862
HL.SW.v1.0.G020808	PLAT domain-containing 3-like	2.1329e-24	2.01828	19.3707	41.4923
HL.SW.v1.0.G020813	CASP 4B1	9.65688e-05	2.66649	1.28987	3.70327
HL.SW.v1.0.G020824	formate--tetrahydrofolate ligase	0.000936275	2.72277	0.854717	2.52714
HL.SW.v1.0.G020849	NAC domain-containing 83-like	2.6616e-08	2.07184	5.33382	11.7536
HL.SW.v1.0.G020874	autophagy-related 3	4.37202e-23	3.12697	5.55693	18.4948
HL.SW.v1.0.G021018	probable S-adenosylmethionine-dependent methyltransferase At5g38100	3.60925e-08	10.66	0.188848	2.46592
HL.SW.v1.0.G021028	crocetin glucosyltransferase, chloroplastic-like	0.000533537	5.58251	0.226769	1.49857
HL.SW.v1.0.G021034	probable phospholipid hydroperoxide glutathione peroxidase	2.32915e-17	3.57192	3.05719	11.6669
HL.SW.v1.0.G021092	transcription initiation factor TFIID subunit 7	0.000150372	2.4946	1.42093	3.81314
HL.SW.v1.0.G021133	biotin carboxylase 1, chloroplastic	7.63617e-13	4.45475	1.42924	6.86989
HL.SW.v1.0.G021172	transcription termination factor MTEF1, chloroplastic	0.00408709	2.10596	1.44549	3.26784
HL.SW.v1.0.G021175	Transmembrane 56-B	0.00067958	3.52759	0.546686	2.13214
HL.SW.v1.0.G021176	glutathione S-transferase DHAR3, chloroplastic-like	3.11049e-14	2.36753	6.63413	16.7028
HL.SW.v1.0.G021179	lipase-like PAD4	3.98187e-06	2.16733	3.16616	7.3157
HL.SW.v1.0.G021196	uncharacterized aarF domain-containing kinase At1g79600, chloroplastic isoform X1	0.000127548	3.15222	0.789468	2.71313
HL.SW.v1.0.G021224	cytochrome b5-like	1.05507e-16	2.22254	9.46428	22.3487
HL.SW.v1.0.G021271	probable carboxylesterase 6	6.38361e-06	2.77799	1.57871	4.71133
HL.SW.v1.0.G021274	tetraspanin-6	7.51403e-07	4.60841	0.627081	3.19004
HL.SW.v1.0.G021288	receptor 12	0.00390628	18.9872	0	0.616333
HL.SW.v1.0.G021371	methylsterol monooxygenase 2-2	1.96836e-15	3.93439	2.17234	9.16453
HL.SW.v1.0.G021450	very-long-chain enoyl- reductase	3.39016e-06	2.03594	4.07122	8.82686
HL.SW.v1.0.G021451	Methyltransf_29 domain-containing	6.63204e-05	30.0493	0	0.994024
HL.SW.v1.0.G021461	CONSTANS-like 1	2.42285e-39	3.13849	9.68242	32.2996
HL.SW.v1.0.G021492	dihydropyrimidinase	1.30416e-05	2.14213	2.96582	6.7821
HL.SW.v1.0.G021501	alpha-amylase-like isoform X1	1.96787e-11	12.7924	0.210055	3.25313
HL.SW.v1.0.G021521	probable inactive receptor kinase At1g48480	0.000262963	2.26478	1.83559	4.45041
HL.SW.v1.0.G021577	Serine threonine- kinase PAK 6	0.00176701	2.11705	1.56088	3.54314
HL.SW.v1.0.G021597	glyoxylate hydroxypyruvate reductase A HPR2-like	7.32883e-23	2.88958	6.58509	20.2452
HL.SW.v1.0.G021598	photosystem I reaction center subunit VI-2, chloroplastic-like	4.28411e-97	2.11527	64.8838	145.59
HL.SW.v1.0.G021611	beta-1,6-galactosyltransferase GALT29A	1.70535e-08	9.91635	0.231907	2.74419
HL.SW.v1.0.G021642	proline-rich receptor kinase PERK3	0.000359211	2.47399	1.24309	3.31161
HL.SW.v1.0.G021655	Ras-related Rab11D	8.14748e-15	2.12701	9.53638	21.5501
HL.SW.v1.0.G021683	5 -adenylylsulfate reductase 3, chloroplastic-like	2.55618e-06	9.89684	0.160316	1.98985
HL.SW.v1.0.G021843	U-box domain-containing 3	5.5511e-06	4.4154	0.606683	2.95927
HL.SW.v1.0.G021858	glutaredoxin family	2.21533e-06	39.6974	0	1.32497
HL.SW.v1.0.G021952	beta-glucosidase 44-like	6.93064e-17	19.0651	0.207291	4.80697
HL.SW.v1.0.G021962	wall-associated receptor kinase-like 22	0.00355371	2.15256	1.3986	3.23276
HL.SW.v1.0.G021977	pectin acetylesterase 8-like	2.86242e-54	5.94439	3.78159	24.0009
HL.SW.v1.0.G021999	2-hydroxyisoflavanone dehydratase-like	8.6436e-14	2.62916	4.7909	13.4139
HL.SW.v1.0.G022049	probable WRKY transcription factor 50 isoform X1	0.00315624	2.21534	1.22429	2.91756
HL.SW.v1.0.G022132	R3H domain-containing 4	2.1559e-11	2.08086	7.52633	16.6412
HL.SW.v1.0.G022150	LOB domain-containing 1-like	5.96081e-08	51.1858	0	1.71878
HL.SW.v1.0.G022173	Adenine nucleotide alpha hydrolases-like superfamily , isoform 1	0.000472009	3.65866	0.506104	2.05357
HL.SW.v1.0.G022200	E3 ubiquitin- ligase MARCH4	7.43502e-05	2.52612	1.53085	4.15265
HL.SW.v1.0.G022236	tropinone reductase homolog At1g07440-like	1.20463e-60	54.406	0.224988	14.8175
HL.SW.v1.0.G022321	glucose-6-phosphate phosphate translocator 2, chloroplastic	1.33555e-12	3.66333	2.06453	8.11321
HL.SW.v1.0.G022323	CRAL-TRIO domain-containing YKL091C	5.40516e-32	2.55793	12.8839	35.0017
HL.SW.v1.0.G022333	3-ketoacyl- synthase 10	1.35705e-64	17.8349	0.941077	18.391
HL.SW.v1.0.G022340	beta-carotene hydroxylase 2, chloroplastic-like	5.6779e-13	2.45356	5.38547	14.0627
HL.SW.v1.0.G022428	geraniol 8-hydroxylase-like	9.26715e-05	2.03863	2.72188	5.91983
HL.SW.v1.0.G022445	beta-glucosidase 3B-like	0.000606138	3.40575	0.604042	2.26467
HL.SW.v1.0.G022489	receptor kinase 1	0.00012112	9.71176	0.10031	1.33096
HL.SW.v1.0.G022515	trithorax group osa	0.00191404	2.84639	0.706436	2.19563
HL.SW.v1.0.G022617	PREDICTED: uncharacterized protein LOC107410704	0.00187829	3.29565	0.495091	1.8096
HL.SW.v1.0.G022725	serine threonine- kinase At5g01020-like	7.45647e-09	6.52429	0.451479	3.31098
HL.SW.v1.0.G022735	xyloglucan endotransglucosylase hydrolase 22-like	0.000274664	11.2679	0.0595618	1.06319
HL.SW.v1.0.G022822	arogenate dehydratase prephenate dehydratase 6, chloroplastic-like	3.93696e-14	2.34228	6.82518	17.0059
HL.SW.v1.0.G022840	Proteasome subunit beta type-1	3.35617e-08	3.92351	1.11245	4.72735
HL.SW.v1.0.G022856	GDSL esterase lipase EXL3-like	2.45806e-15	3.27812	3.18896	11.1658
HL.SW.v1.0.G022890	F-box PP2-B10-like	7.50484e-07	2.91448	1.65136	5.17016
HL.SW.v1.0.G022915	serine threonine- kinase	2.54295e-06	3.00469	1.43295	4.6351
HL.SW.v1.0.G022951	Xylem cysteine ase 1	0.000488294	5.48657	0.210229	1.37621
HL.SW.v1.0.G022952	CMP-sialic acid transporter 4	4.84946e-09	5.22042	0.728435	4.17789
HL.SW.v1.0.G023008	NAC domain-containing 89	7.84731e-05	2.35304	1.81397	4.57404
HL.SW.v1.0.G023011	trans-cinnamate 4-monooxygenase	6.00401e-14	2.38582	6.37164	16.166
HL.SW.v1.0.G023035	DNA-damage-repair toleration DRT100-like	0.000144962	14.1894	0.0477796	1.17173
HL.SW.v1.0.G023039	mitogen-activated kinase homolog MMK2	3.19702e-38	5.12185	3.58733	19.6208
HL.SW.v1.0.G023161	V-type proton ATPase 16 kDa proteolipid subunit	1.97644e-156	5.02595	40.7076	217.183
HL.SW.v1.0.G023245	laccase-11-like	2.49977e-07	7.06753	0.318729	2.59928
HL.SW.v1.0.G023247	1-aminocyclopropane-1-carboxylate oxidase homolog 1-like	5.29623e-09	4.20715	1.03505	4.72618
HL.SW.v1.0.G023362	pentatricopeptide repeat-containing At4g35850, mitochondrial	0.00280677	2.09832	1.5788	3.55025
HL.SW.v1.0.G023367	probable membrane-associated kinase regulator 5	4.92355e-05	7.55288	0.172223	1.60231
HL.SW.v1.0.G023375	ER lumen -retaining receptor	3.42738e-09	2.12368	5.52412	12.4819
HL.SW.v1.0.G023394	hypothetical protein L484_026240	4.22798e-05	4.81119	0.420794	2.27767
HL.SW.v1.0.G023398	serine threonine- kinase 16	6.97478e-08	6.20296	0.441184	3.07979
HL.SW.v1.0.G023435	FT-interacting 1-like	0.00234989	6.26687	0.121899	0.98956
HL.SW.v1.0.G023502	DMR6-LIKE OXYGENASE 2-like	2.45385e-93	66.4594	0.290436	22.7339
HL.SW.v1.0.G023503	DMR6-LIKE OXYGENASE 2-like	9.8221e-14	6.58122	0.816432	5.89518
HL.SW.v1.0.G023515	expansin-A8	5.34352e-08	3.76748	1.14178	4.65635
HL.SW.v1.0.G023534	Allene_ox_cyc domain-containing , partial	6.45249e-06	3.05144	1.23014	4.05022
HL.SW.v1.0.G023536	endoplasmic reticulum oxidoreductin-1-like	3.48938e-08	2.40209	3.37312	8.64009
HL.SW.v1.0.G023548	beta-carotene hydroxylase 2, chloroplastic-like	0.00151376	3.89878	0.344901	1.52556
HL.SW.v1.0.G023573	B-box zinc finger 19-like	5.04933e-09	2.15509	5.13443	11.7741
HL.SW.v1.0.G023575	metallothiol transferase	2.74586e-16	4.85406	1.57218	8.22756
HL.SW.v1.0.G023610	ribonucleoside-diphosphate reductase small chain	1.5572e-16	3.85648	2.46738	10.1906
HL.SW.v1.0.G023655	endochitinase EP3	4.33047e-64	8.58012	16.5263	150.62
HL.SW.v1.0.G023664	syntaxin-31 isoform X2	0.000409568	2.86299	0.856188	2.66319
HL.SW.v1.0.G023672	oleoyl-acyl carrier thioesterase 1, chloroplastic	1.01953e-05	2.59575	1.74907	4.86958
HL.SW.v1.0.G023738	glutathione-specific gamma-glutamylcyclotransferase 2	6.95147e-44	2.44433	20.1133	52.1846
HL.SW.v1.0.G023785	probable serine threonine- kinase At1g54610 isoform X1	1.97014e-06	4.13888	0.736136	3.33745
HL.SW.v1.0.G023836	AMMECR1 family	6.56444e-79	4.31289	23.0579	105.572
HL.SW.v1.0.G023838	vesicle-associated membrane 727	2.20427e-24	2.18169	15.108	35.001
HL.SW.v1.0.G023858	pectinesterase-like	8.71386e-10	2.36163	4.39716	11.0581
HL.SW.v1.0.G023885	squalene monooxygenase-like	0.00257687	5.49935	0.173155	1.16364
HL.SW.v1.0.G023913	26S proteasome non-ATPase regulatory subunit 14 homolog	1.37217e-09	2.44114	3.9385	10.245
HL.SW.v1.0.G023929	beta-hexosaminidase 3	0.00012112	7.17557	0.151749	1.36618
HL.SW.v1.0.G023982	UDP-sugar pyrophosphorylase	0.00434359	3.83537	0.277366	1.22522
HL.SW.v1.0.G024076	haloacid dehalogenase-like hydrolase	6.96306e-18	5.27145	1.5129	8.60703
HL.SW.v1.0.G024158	calmodulin 3	2.98042e-08	52.8214	0	1.77452
HL.SW.v1.0.G024180	hypothetical protein L484_007036	0.0025633	2.86952	0.604248	1.90405
HL.SW.v1.0.G024209	hypothetical protein L484_013594	0.00390628	19.1606	0	0.621848
HL.SW.v1.0.G024225	stress-induced receptor-like kinase	2.31326e-25	5.83815	1.86594	11.718
HL.SW.v1.0.G024254	carotenoid 9,10(9 ,10 )-cleavage dioxygenase 1	0.00106506	3.30884	0.550806	2.01197
HL.SW.v1.0.G024263	ninja-family 1-like	0.00126009	3.04195	0.684616	2.27748
HL.SW.v1.0.G024294	tryptophan synthase beta chain 1	0.000518808	10.5558	0.0617444	1.02054
HL.SW.v1.0.G024328	cytochrome P450 89A2-like	8.19377e-17	8.20486	0.683645	6.20108
HL.SW.v1.0.G024350	bifunctional L-3-cyanoalanine synthase cysteine synthase 1, mitochondrial	6.22487e-37	2.79319	142.297	421.562
HL.SW.v1.0.G024377	probable mitochondrial saccharopine dehydrogenase-like oxidoreductase At5g39410	0.000508282	3.70932	0.453848	1.87809
HL.SW.v1.0.G024381	BAHD acyltransferase DCR	1.9979e-73	18.9364	0.934437	19.3729
HL.SW.v1.0.G024515	uncharacterized acetyltransferase At3g50280-like	8.04706e-07	15.6296	0.0705776	1.67024
HL.SW.v1.0.G024556	COBRA-like	5.21696e-09	4.23064	1.05069	4.8237
HL.SW.v1.0.G024569	probable phosphatase 2C 60	6.11328e-07	2.02491	4.6184	9.95398
HL.SW.v1.0.G024570	TIC 20-II, chloroplastic	1.0336e-10	5.59859	0.811632	4.96849
HL.SW.v1.0.G024688	cytochrome b-c1 complex subunit Rieske, mitochondrial	0.00401962	18.7664	0	0.609391
HL.SW.v1.0.G024692	probable isoaspartyl peptidase L-asparaginase 2	7.04308e-05	2.60889	1.41617	3.97363
HL.SW.v1.0.G024741	probable WRKY transcription factor 70	6.85272e-27	4.90975	2.68566	14.1169
HL.SW.v1.0.G024783	neutral alkaline invertase 3, chloroplastic-like	6.57512e-05	3.67409	0.598162	2.42256
HL.SW.v1.0.G024801	Receptor kinase HAIKU2	0.000912262	4.84361	0.28437	1.59227
HL.SW.v1.0.G024842	lysine--tRNA ligase-like isoform X1	0.000976578	7.60849	0.0892958	0.946332
HL.SW.v1.0.G024878	probable galactinol--sucrose galactosyltransferase 5	5.09084e-09	4.94845	0.792771	4.29655
HL.SW.v1.0.G024882	Phosphoenolpyruvate carboxylase family isoform 2	0.00434359	4.55555	0.230279	1.23376
HL.SW.v1.0.G024897	beta-amyrin 28-oxidase-like	0.00390628	12.8024	0.0137555	0.591706
HL.SW.v1.0.G024937	calmodulin 8	1.37591e-13	5.30429	1.11197	6.40497
HL.SW.v1.0.G025068	FAR1-RELATED SEQUENCE 5-like isoform X1	0.000153902	2.92062	0.918357	2.91019
HL.SW.v1.0.G025093	CYPRO4	0.00260229	2.52513	0.891794	2.43966
HL.SW.v1.0.G025122	probable aldo-keto reductase 1	0.00131228	7.31444	0.109019	1.0631
HL.SW.v1.0.G025145	vacuolar amino acid transporter 1-like	1.88278e-08	2.54586	3.03749	8.25178
HL.SW.v1.0.G025149	serine threonine- kinase At3g51990	2.54505e-05	4.58381	0.485826	2.48316
HL.SW.v1.0.G025157	polyadenylate-binding 2-like	1.99272e-37	3.15725	9.10712	30.5601
HL.SW.v1.0.G025212	early nodulin 3	0.000144962	10.1965	0.0811018	1.18989
HL.SW.v1.0.G025238	hypothetical protein KK1_015115	0.000119761	2.03453	2.81008	6.10108
HL.SW.v1.0.G025325	ER membrane complex subunit 2	6.38849e-06	2.75074	1.5808	4.67232
HL.SW.v1.0.G025362	MYST-like histone acetyltransferase 1	1.40926e-11	2.62728	3.92036	10.9785
HL.SW.v1.0.G025378	psbP domain-containing 1, chloroplastic-like	1.61184e-06	2.12859	3.60665	8.17922
HL.SW.v1.0.G025399	probable transmembrane ascorbate ferrireductase 3	6.67852e-08	10.1393	0.193252	2.39278
HL.SW.v1.0.G025404	lysine histidine transporter-like 8	5.77463e-08	21.5793	0.054738	1.95764
HL.SW.v1.0.G025456	beta-amyrin synthase-like	1.17053e-10	9.95887	0.29749	3.44573
HL.SW.v1.0.G025466	uncharacterized membrane At1g16860-like	0.00341801	6.68614	0.0902258	0.833316
HL.SW.v1.0.G025468	RNA polymerase II subunit A C-terminal domain phosphatase SSU72	5.26733e-07	2.02712	4.6845	10.1111
HL.SW.v1.0.G025527	membrane-anchored ubiquitin-fold 3-like isoform X1	1.64788e-07	2.27549	3.48459	8.45121
HL.SW.v1.0.G025532	(R,S)-reticuline 7-O-methyltransferase-like	0.00195314	20.3564	0	0.663454
HL.SW.v1.0.G025533	acetyl- acetyltransferase, cytosolic 1	3.18676e-10	2.2816	5.05836	12.283
HL.SW.v1.0.G025578	Glucan endo-1,3-beta-glucosidase 13	2.77828e-05	2.28375	2.30301	5.62166
HL.SW.v1.0.G025587	ATP-dependent Clp protease proteolytic subunit 6, chloroplastic	1.70656e-30	2.04372	23.5861	51.1521
HL.SW.v1.0.G025603	Cellulose synthase E6	3.3292e-06	2.93481	1.49963	4.73369
HL.SW.v1.0.G025630	sphinganine C4-monooxygenase 1-like	6.25377e-73	2.91045	18.8126	58.1409
HL.SW.v1.0.G025636	30S ribosomal S5, chloroplastic	5.74327e-21	2.08101	14.9123	32.9457
HL.SW.v1.0.G025697	Zeatin O-glucosyltransferase	7.42805e-06	5.6334	0.342658	2.20725
HL.SW.v1.0.G025726	beta carbonic anhydrase 5, chloroplastic-like isoform X2	2.99206e-07	2.16479	3.97198	9.15846
HL.SW.v1.0.G025855	Serine threonine- kinase WNK-related isoform 1	1.3662e-05	2.38774	2.07957	5.312
HL.SW.v1.0.G025879	E3 ubiquitin- ligase RNF8-B	5.92149e-08	3.92338	1.02059	4.3459
HL.SW.v1.0.G025934	pheophytinase, chloroplastic	0.00119329	3.32675	0.522672	1.92494
HL.SW.v1.0.G025937	caffeoylshikimate esterase-like	1.09687e-05	2.66904	1.56224	4.47957
HL.SW.v1.0.G025955	E3 ubiquitin- ligase RING1	2.91074e-11	73.4041	0	2.48028
HL.SW.v1.0.G025958	glucose-6-phosphate 1-epimerase isoform X1	0.000273353	2.07307	2.30725	5.10909
HL.SW.v1.0.G025979	calmodulin 2	6.46456e-35	3.47525	6.86033	25.3669
HL.SW.v1.0.G026064	N-alpha-acetyltransferase 15, auxiliary subunit	0.000179998	5.54159	0.251475	1.63292
HL.SW.v1.0.G026090	F-box At1g67340	1.99346e-26	8.01573	1.1749	10.2361
HL.SW.v1.0.G026140	probable E3 ubiquitin- ligase XERICO	2.5942e-08	2.52948	2.9681	8.01411
HL.SW.v1.0.G026145	methylthioribose kinase-like	5.50424e-06	2.18173	3.10933	7.23551
HL.SW.v1.0.G026157	tubulin beta-1 chain	2.32221e-34	2.00875	28.247	60.2071
HL.SW.v1.0.G026161	4-hydroxybenzoate polyprenyltransferase, mitochondrial-like	0.00165812	3.0554	0.592121	1.98711
HL.SW.v1.0.G026212	SCO1 homolog 2, mitochondrial-like	9.25948e-11	2.12102	6.70677	15.1254
HL.SW.v1.0.G026221	thylakoid lumenal 15 kDa 1, chloroplastic	0.000379913	2.34104	1.56905	3.942
HL.SW.v1.0.G026243	Actin-related 3	1.74305e-05	3.46402	0.863548	3.25567
HL.SW.v1.0.G026322	glucose-1-phosphate adenylyltransferase large subunit 3, chloroplastic amyloplastic	5.95293e-40	8.88564	1.51775	14.5743
HL.SW.v1.0.G026370	NRT1 PTR FAMILY -like	0.00249398	4.4193	0.285166	1.45493
HL.SW.v1.0.G026419	mitochondrial inner membrane OXA1-like	0.00222767	2.30045	1.20053	2.97359
HL.SW.v1.0.G026431	Purple acid phosphatase 3	2.02715e-06	2.46409	2.35639	6.20677
HL.SW.v1.0.G026442	probable purine permease 11	2.30164e-12	8.94204	0.426255	4.31598
HL.SW.v1.0.G026470	Beta-D-xylosidase 1	1.48794e-12	2.6384	4.24223	11.9228
HL.SW.v1.0.G026486	ethylene-responsive transcription factor RAP2-3	4.58594e-15	5.17994	1.29627	7.26549
HL.SW.v1.0.G026497	polypyrimidine tract-binding homolog 3 isoform X1	1.00004e-05	2.11007	3.23818	7.28336
HL.SW.v1.0.G026521	transaldolase family	4.64697e-10	2.16081	5.87981	13.5164
HL.SW.v1.0.G026530	heat shock 70 kDa	1.94319e-05	10.4806	0.110976	1.55704
HL.SW.v1.0.G026555	enhanced disease susceptibility	7.87931e-08	7.78968	0.300404	2.71613
HL.SW.v1.0.G026622	REDUCED WALL ACETYLATION 2 isoform X1	5.81646e-10	2.18697	5.56642	12.9518
HL.SW.v1.0.G026687	zinc finger ZAT10	3.16397e-10	7.37154	0.470075	3.89369
HL.SW.v1.0.G026692	GABA transporter 1	9.51389e-12	5.85964	0.792275	5.09275
HL.SW.v1.0.G026720	glyoxylate succinic semialdehyde reductase 2, chloroplastic	1.85136e-07	2.09527	4.60599	10.2747
HL.SW.v1.0.G026833	cytokinin dehydrogenase 6-like	0.00337797	2.79591	0.653587	2.00277
HL.SW.v1.0.G026858	aldo-keto reductase family 4 member C10-like	5.52577e-15	3.07375	3.6645	12.0177
HL.SW.v1.0.G026869	lysosomal Pro-X carboxypeptidase-like	5.63229e-09	13.5177	0.153946	2.6345
HL.SW.v1.0.G026910	hypersensitive-induced response 1	6.88885e-18	10.3216	0.514419	5.94886
HL.SW.v1.0.G026981	Phytochrome A-associated F-box	8.39838e-25	2.88443	7.22466	22.161
HL.SW.v1.0.G027019	digalactosyldiacylglycerol synthase 2, chloroplastic-like	2.1636e-08	4.89448	0.706385	3.801
HL.SW.v1.0.G027046	nucleotide-diphospho-sugar transferase, nucleotide-diphospho-sugar transferase	2.25159e-11	3.08476	2.57199	8.48709
HL.SW.v1.0.G027132	mannose glucose-specific lectin-like isoform X2	5.83919e-19	36.6683	0.0920217	4.79542
HL.SW.v1.0.G027174	pectate lyase-like	0.000488288	23.8747	0	0.7833
HL.SW.v1.0.G027179	esterase-like isoform X7	2.77479e-67	7.67001	2.80606	23.0579
HL.SW.v1.0.G027186	Ubiquitin-conjugating enzyme E2 7	0.0018594	2.23509	1.29276	3.10638
HL.SW.v1.0.G027192	MLO 6	1.54915e-11	2.23756	6.09924	14.5153
HL.SW.v1.0.G027204	GDSL esterase lipase	3.70901e-11	14.2328	0.183116	3.21564
HL.SW.v1.0.G027240	probable metal-nicotianamine transporter YSL5	5.55576e-15	4.67182	1.54922	7.80063
HL.SW.v1.0.G027260	enhanced ethylene response 5	0.000728622	6.9706	0.131272	1.1754
HL.SW.v1.0.G027288	cytochrome P450 71D11-like	2.77961e-19	26.4358	0.153679	5.18854
HL.SW.v1.0.G027337	reverse transcriptase	9.2485e-06	4.49912	0.515427	2.57921
HL.SW.v1.0.G027344	homeobox-leucine zipper ATHB-12-like	1.94141e-08	15.183	0.114916	2.33348
HL.SW.v1.0.G027358	UDP-glycosyltransferase 79B30-like	1.11766e-07	18.0602	0.067884	1.88575
HL.SW.v1.0.G027451	PREDICTED: uncharacterized protein LOC107423434 isoform X1	2.45739e-06	2.42828	2.41106	6.25747
HL.SW.v1.0.G027563	probable calcium-binding CML49	7.42805e-06	5.50981	0.344838	2.16824
HL.SW.v1.0.G027639	fasciclin-like arabinogalactan 2	4.99028e-07	3.01499	1.63077	5.28259
HL.SW.v1.0.G027668	cycloeucalenol cycloisomerase	3.02602e-09	2.91634	2.35138	7.33644
HL.SW.v1.0.G027718	TIC 55, chloroplastic	0.00332698	3.1522	0.462242	1.61957
HL.SW.v1.0.G027732	1-aminocyclopropane-1-carboxylate oxidase	2.83982e-15	2.51827	89.8798	240.077
HL.SW.v1.0.G027737	sucrose synthase 5-like	0.00183108	12.8612	0.0332901	0.85999
HL.SW.v1.0.G027800	sugar transporter ERD6-like 5	9.03148e-11	3.83014	1.53555	6.33321
HL.SW.v1.0.G027824	Pyruvate kinase, cytosolic isozyme	2.75127e-06	3.12364	1.22494	4.1324
HL.SW.v1.0.G027878	HOMOLOG OF MAMMALIAN LYST-INTERACTING PROTEIN 5	0.00383845	2.383	1.01911	2.62255
HL.SW.v1.0.G027909	Thioredoxin-like protein	7.88986e-17	2.28837	8.72221	21.2102
HL.SW.v1.0.G027943	probable glutathione S-transferase	1.39703e-152	4.37259	12.7204	59.0996
HL.SW.v1.0.G027961	PREDICTED: uncharacterized protein LOC107411126	2.50378e-06	2.8007	1.64798	4.95611
HL.SW.v1.0.G028003	phospho-2-dehydro-3-deoxyheptonate aldolase 1, chloroplastic-like	4.79684e-18	2.26548	9.69631	23.3373
HL.SW.v1.0.G028016	quinone-oxidoreductase homolog, chloroplastic	5.53701e-35	3.17709	8.38962	28.3488
HL.SW.v1.0.G028019	COFACTOR ASSEMBLY OF COMPLEX C SUBUNIT B CCB3, chloroplastic	0.00108296	2.22498	1.4962	3.5723
HL.SW.v1.0.G028059	14-3-3 C	1.27955e-46	2.68687	16.7335	47.7382
HL.SW.v1.0.G028093	cucumber peeling cupredoxin-like	3.5891e-05	3.82618	0.665798	2.7999
HL.SW.v1.0.G028128	zinc finger ZAT5-like	6.6191e-05	5.02881	0.331453	1.90794
HL.SW.v1.0.G028130	glutathione S-transferase T1	3.84599e-24	23.1626	0.237247	6.5753
HL.SW.v1.0.G028147	endoglucanase 24-like	0.00341801	10.3594	0.0449124	0.81336
HL.SW.v1.0.G028165	probable GABA transporter 2	8.79798e-05	6.86548	0.186127	1.55558
HL.SW.v1.0.G028200	secretory carrier-associated membrane	0.000244144	26.0311	0	0.857005
HL.SW.v1.0.G028240	eukaryotic translation initiation factor NCBP	1.09829e-23	2.49217	10.0135	26.5173
HL.SW.v1.0.G028259	CBL-interacting serine threonine- kinase 9	0.000409568	2.92124	0.847564	2.69263
HL.SW.v1.0.G028350	3-ketoacyl- synthase 6	3.05343e-38	8.52123	9.72746	88.1506
HL.SW.v1.0.G028354	transcription factor MYC2-like	0.00308781	2.65162	0.81578	2.35115
HL.SW.v1.0.G028361	Delta(24)-sterol reductase	3.01855e-09	2.14507	5.34391	12.1986
HL.SW.v1.0.G028374	probable voltage-gated potassium channel subunit beta	2.51496e-06	2.37241	2.91864	7.39086
HL.SW.v1.0.G028409	serine arginine-rich splicing factor SR45 isoform X1	5.26716e-07	2.21745	3.52763	8.33483
HL.SW.v1.0.G028450	monoacylglycerol lipase ABHD6	0.00432416	2.61312	0.722327	2.05729
HL.SW.v1.0.G028517	xyloglucan galactosyltransferase MUR3	5.77895e-05	3.10956	0.941991	3.18007
HL.SW.v1.0.G028532	Enolase	1.01864e-07	2.56009	2.67226	7.3082
HL.SW.v1.0.G028538	PI-PLC X domain-containing At5g67130	0.0037939	2.20224	1.17157	2.77828
HL.SW.v1.0.G028592	SUPPRESSOR OF GENE SILENCING 3	1.59988e-07	3.98656	0.950597	4.11969
HL.SW.v1.0.G028599	myb-related 308-like	0.00195314	20.1131	0	0.654826
HL.SW.v1.0.G028623	1-aminocyclopropane-1-carboxylate oxidase homolog 1-like	0.000170165	3.63918	0.570138	2.28923
HL.SW.v1.0.G028670	phosphoenolpyruvate phosphate translocator 1, chloroplastic	0.000101323	2.14593	2.42354	5.55169
HL.SW.v1.0.G028672	PI-PLC X-box domain-containing DDB_G0293730	5.58555e-96	3.47959	15.0246	55.5324
HL.SW.v1.0.G028721	strigolactone esterase D14	8.15922e-100	2.9648	40.3238	126.848
HL.SW.v1.0.G028749	glutamine synthetase leaf isozyme, chloroplastic	6.23098e-35	3.04747	94.6139	305.835
HL.SW.v1.0.G028890	probable carboxylesterase 15	6.00024e-83	6.44112	4.40851	30.296
HL.SW.v1.0.G028947	beta-fructofuranosidase, insoluble isoenzyme CWINV1	4.6889e-08	5.92398	0.493739	3.27378
HL.SW.v1.0.G028999	alcohol dehydrogenase class-3	5.16616e-23	2.93416	6.44201	20.1079
HL.SW.v1.0.G029073	ras-related RABB1b	1.66322e-06	3.53113	0.982322	3.7652
HL.SW.v1.0.G029199	peroxidase A2-like	3.02174e-09	13.9093	0.15284	2.69634
HL.SW.v1.0.G029228	cyclic nucleotide-gated ion channel 2	1.11206e-05	2.15945	2.90834	6.69875
HL.SW.v1.0.G029233	fatty-acid-binding 1	3.75788e-06	2.05198	3.83226	8.37479
HL.SW.v1.0.G029265	UDP-glucose flavonoid 3-O-glucosyltransferase 3	0.000976578	12.0809	0.0455971	0.963178
HL.SW.v1.0.G029379	annexin D2-like	1.85092e-45	2.55284	18.6068	50.4234
HL.SW.v1.0.G029409	trafficking particle complex subunit 5	1.20364e-30	2.41389	14.3303	36.7329
HL.SW.v1.0.G029411	pollen-specific leucine-rich repeat extensin 1 isoform X1	2.67146e-31	3.68681	5.43016	21.3254
HL.SW.v1.0.G029609	exocyst complex component EXO70B1	0.00231576	3.48075	0.407015	1.5871
HL.SW.v1.0.G029620	G-type lectin S-receptor-like serine threonine- kinase At5g24080	6.16529e-06	7.66087	0.220706	2.02086
HL.SW.v1.0.G029645	cytochrome c6, chloroplastic	1.69417e-19	2.35606	11.32	28.326
HL.SW.v1.0.G029669	probable carboxylesterase 12	3.51458e-10	66.0671	0	2.23025
HL.SW.v1.0.G029713	probable methyltransferase PMT7	0.00432416	2.76977	0.671135	2.03122
HL.SW.v1.0.G029786	GDSL esterase lipase At1g33811	1.13708e-13	87.5725	0	2.96563
HL.SW.v1.0.G029795	cyclin-U4-1	1.61537e-11	5.5421	0.831926	5.04833
HL.SW.v1.0.G029846	peptidyl-prolyl cis-trans isomerase CYP37, chloroplastic isoform X2	1.95891e-26	10.9519	0.740277	8.94162
HL.SW.v1.0.G029905	2-methylene-furan-3-one reductase-like	2.51377e-13	7.85604	0.557639	4.88862
HL.SW.v1.0.G029923	delta(1)-pyrroline-2-carboxylate reductase	6.94113e-18	115.418	0	3.91999
HL.SW.v1.0.G029935	nudix hydrolase 8	0.00380182	2.49875	0.873953	2.3689
HL.SW.v1.0.G030020	transcription termination factor MTERF4, chloroplastic	0.0025633	2.92571	0.602176	1.93395
HL.SW.v1.0.G030041	inositol 1,3,4-trisphosphate 5 6-kinase 4 isoform X1	0.000535471	2.74227	0.912441	2.71407
HL.SW.v1.0.G030053	Histone deacetylase complex subunit SAP30 SAP30	1.5419e-09	3.64816	1.47442	5.79822
HL.SW.v1.0.G030118	digalactosyldiacylglycerol synthase 1, chloroplastic	0.000685609	2.69272	0.969284	2.82541
HL.SW.v1.0.G030138	galactinol synthase 2	2.53176e-83	16.9086	1.2297	22.5876
HL.SW.v1.0.G030301	Cinnamyl alcohol dehydrogenase 1	1.08291e-20	4.14281	2.7697	12.2703
HL.SW.v1.0.G030305	alpha-galactosidase 1	2.57964e-11	2.29513	5.61978	13.7211
HL.SW.v1.0.G030312	Aldehyde dehydrogenase	4.08339e-10	2.75949	2.95177	8.69731
HL.SW.v1.0.G030382	shewanella phosphatase 2	5.24494e-07	3.42198	1.15146	4.26321
HL.SW.v1.0.G030398	tetrahydrocannabinolic acid synthase-like	8.25054e-07	3.49527	1.11835	4.23222
HL.SW.v1.0.G030433	phenylalanine ammonia-lyase	1.50685e-14	3.61913	2.46727	9.55664
HL.SW.v1.0.G030473	bidirectional sugar transporter SWEET2	3.47952e-06	2.64157	1.85621	5.25543
HL.SW.v1.0.G030477	Cysteine-rich receptor kinase 25	2.74417e-05	7.09238	0.196549	1.68845
HL.SW.v1.0.G030487	hypothetical protein L484_003183	2.46219e-18	3.35794	3.73369	13.38
HL.SW.v1.0.G030497	actin	0.00259953	4.52737	0.24451	1.29528
HL.SW.v1.0.G030552	heat shock binding ,	2.02642e-06	2.47671	2.33556	6.18637
HL.SW.v1.0.G030560	CASEIN KINASE I-LIKE 3-like	0.000214623	2.19496	2.04669	4.80698
HL.SW.v1.0.G030642	ubiquinol oxidase, mitochondrial-like	3.26956e-08	3.36613	1.49566	5.41927
HL.SW.v1.0.G030882	haloacid dehalogenase-like hydrolase domain-containing At2g33255	5.08531e-05	3.00699	1.03059	3.35612
HL.SW.v1.0.G030896	gamma aminobutyrate transaminase 3, chloroplastic	4.36517e-67	3.73401	10.4859	41.6129
HL.SW.v1.0.G030914	probable purine permease 11 isoform X2	4.05634e-05	4.01228	0.571239	2.53515
HL.SW.v1.0.G030917	probable pectinesterase pectinesterase inhibitor 34	3.98624e-49	5.00152	4.85799	25.904
HL.SW.v1.0.G030918	beta-galactosidase-like isoform X1	6.08893e-11	4.66416	1.07553	5.4447
HL.SW.v1.0.G030941	Cytochrome P450 98A2	1.00887e-07	6.85576	0.365113	2.85655
HL.SW.v1.0.G030944	Ribosomal L34e superfamily ,	1.20615e-07	2.05058	4.99985	10.9084
HL.SW.v1.0.G030964	CASP 4A4	1.40631e-131	3.71027	13.9565	55.0022
HL.SW.v1.0.G030975	dihydroorotate dehydrogenase,	6.06639e-54	3.82182	8.99296	36.5561
HL.SW.v1.0.G030980	sugar transporter ERD6-like 7	1.01458e-05	3.33685	0.962116	3.48313
HL.SW.v1.0.G031008	1-aminocyclopropane-1-carboxylate oxidase homolog 4-like	1.44461e-11	4.34852	1.28859	6.05515
HL.SW.v1.0.G031026	probable phospholipase A2 homolog 1	0.00145055	2.87141	0.667764	2.09732
HL.SW.v1.0.G031030	U-box domain-containing 13	0.00265119	2.05697	1.71113	3.76703
HL.SW.v1.0.G031077	dihydropyrimidine dehydrogenase (NADP(+)), chloroplastic	1.36237e-08	3.91506	1.10611	4.69106
HL.SW.v1.0.G031079	asparagine synthetase [glutamine-hydrolyzing] 1	1.24226e-12	3.51333	2.18082	8.21131
HL.SW.v1.0.G031150	probable UDP-N-acetylglucosamine--peptide N-acetylglucosaminyltransferase SEC	4.36597e-39	2.17494	25.1077	57.9504
HL.SW.v1.0.G031158	BAG family molecular chaperone regulator 3-like	2.38995e-38	3.08906	9.80695	32.1926
HL.SW.v1.0.G031210	cyclin-dependent kinase E-1-like	1.20647e-11	6.12663	0.711071	4.79854
HL.SW.v1.0.G031224	oligopeptide transporter 1-like	0.00208821	2.72173	0.806232	2.38582
HL.SW.v1.0.G031263	zinc transporter 2	0.0026674	2.43455	1.02228	2.68802
HL.SW.v1.0.G031294	DELLA GAIP-B	7.57665e-08	2.87932	1.98764	6.13109
HL.SW.v1.0.G031347	cytokinin riboside 5 -monophosphate phosphoribohydrolase LOG5-like	5.63229e-09	11.8631	0.179272	2.62552
HL.SW.v1.0.G031375	TLC domain-containing At5g14285-like	9.28648e-61	413.179	0	14.1206
HL.SW.v1.0.G031380	biotin carboxyl carrier of acetyl- carboxylase	1.5402e-40	3.41002	8.37056	30.3504
HL.SW.v1.0.G031411	GDSL esterase lipase At4g26790	3.625e-07	5.83237	0.431265	2.83493
HL.SW.v1.0.G031480	nematode resistance -like HSPRO2	2.18667e-12	3.16571	2.69108	9.10816
HL.SW.v1.0.G031481	probable pectinesterase pectinesterase inhibitor 51	5.26568e-08	5.25813	0.579859	3.37802
HL.SW.v1.0.G031484	mitogen-activated kinase homolog MMK1	3.82153e-06	2.91106	1.45429	4.55387
HL.SW.v1.0.G031557	zinc finger CCCH domain-containing 40-like	0.000976573	23.4887	0	0.77018
HL.SW.v1.0.G031565	probable WRKY transcription factor 70	1.92668e-62	8.92715	15.0761	142.996
HL.SW.v1.0.G031604	NADH dehydrogenase [ubiquinone] 1 beta subcomplex subunit 9	4.37046e-08	2.36303	3.46079	8.72081
HL.SW.v1.0.G031683	inorganic phosphate transporter 1-4-like	0.000912262	4.48058	0.298335	1.53677
HL.SW.v1.0.G031715	probable aldo-keto reductase 1	1.10105e-11	11.798	0.251939	3.52058
HL.SW.v1.0.G031924	transmembrane ,	8.65624e-10	14.5725	0.153585	2.84037
HL.SW.v1.0.G031948	cysteine-rich receptor kinase 19	0.00219411	2.23005	1.34472	3.22473
HL.SW.v1.0.G031994	thylakoidal processing peptidase 2	2.09894e-07	6.25697	0.41442	2.92774
HL.SW.v1.0.G032011	11-beta-hydroxysteroid dehydrogenase-like 4A	1.29143e-05	5.55158	0.33761	2.14325
HL.SW.v1.0.G032105	NAD-dependent deacetylase SRT2 isoform X1	0.00106506	3.20436	0.579152	2.04115
HL.SW.v1.0.G032120	calcium-dependent kinase 26	1.18289e-19	2.16331	12.2903	28.2397
HL.SW.v1.0.G032157	actin	9.57661e-06	2.18924	2.82412	6.59741
HL.SW.v1.0.G032176	Proteasome subunit beta type-7-B	1.52574e-107	4.15201	11.1082	49.0113
HL.SW.v1.0.G032191	Dual specificity kinase shkB	1.97014e-06	4.1316	0.739189	3.34791
HL.SW.v1.0.G032193	homeobox-leucine zipper HOX3	0.000191086	4.29447	0.430066	2.07101
HL.SW.v1.0.G032224	SSUH2 homolog	5.70983e-15	4.48275	1.64354	7.93482
HL.SW.v1.0.G032269	O-acyltransferase WSD1-like	4.43414e-07	7.02237	0.309703	2.51294
HL.SW.v1.0.G032317	PRA1 family D-like	1.87981e-34	3.10683	8.65404	28.5861
HL.SW.v1.0.G032363	DC1 domain-containing	3.10315e-07	6.52769	0.363894	2.7096
HL.SW.v1.0.G032420	probable receptor kinase At5g20050	2.98095e-06	2.65506	1.88684	5.36923
HL.SW.v1.0.G032464	peroxiredoxin-2E-1, chloroplastic-like	7.6296e-05	13.5073	0.0579764	1.25725
HL.SW.v1.0.G032469	probable WRKY transcription factor 15	2.95936e-10	2.16726	5.85151	13.4908
HL.SW.v1.0.G032503	phytanoyl- dioxygenase	5.31998e-13	2.51357	5.09196	13.6225
HL.SW.v1.0.G032540	NUCLEAR FUSION DEFECTIVE 4-like	2.64696e-12	5.33989	0.984409	5.72475
HL.SW.v1.0.G032587	vesicle transport v-SNARE 12	2.21214e-08	2.83091	2.32581	7.04558
HL.SW.v1.0.G032669	50S ribosomal L13, chloroplastic	1.21134e-12	4.65932	1.26988	6.40622
HL.SW.v1.0.G032706	Quinone oxidoreductase	5.5511e-06	4.38122	0.610881	2.95542
HL.SW.v1.0.G032755	carbonic anhydrase 2 isoform X1	2.04914e-113	3.2069	28.4713	96.9144
HL.SW.v1.0.G032784	caffeoylshikimate esterase	3.61668e-50	13.6195	1.06354	15.7933
HL.SW.v1.0.G032957	transporter arsB	3.71561e-27	6.38864	1.73243	11.9244
HL.SW.v1.0.G032974	bifunctional 3-dehydroquinate dehydratase shikimate dehydrogenase, chloroplastic	3.625e-07	5.95098	0.42578	2.85684
HL.SW.v1.0.G033023	transport Sec61 subunit gamma	1.14698e-68	3.70218	139.085	546.182
HL.SW.v1.0.G033024	peroxidase 55	2.98042e-08	52.8554	0	1.77573
HL.SW.v1.0.G033063	hypothetical protein L484_026326	9.12165e-06	2.04769	3.52728	7.69684
HL.SW.v1.0.G033119	2-succinylbenzoate-- ligase, chloroplastic peroxisomal	0.00432416	2.75623	0.685955	2.06521
HL.SW.v1.0.G033142	photosystem I chlorophyll a b-binding 5, chloroplastic	5.28796e-31	2.25408	17.6192	42.1558
HL.SW.v1.0.G033143	homeobox-leucine zipper ATHB-52-like	3.48506e-10	2.45925	4.09453	10.7236
HL.SW.v1.0.G033180	probable pectate lyase 18	1.04786e-06	3.67072	0.948418	3.78356
HL.SW.v1.0.G033201	ribosome production factor 2 homolog	4.46547e-05	2.18888	2.47519	5.78929
HL.SW.v1.0.G033208	proline dehydrogenase 2, mitochondrial	0.000244144	27.3075	0	0.901105
HL.SW.v1.0.G033209	KH domain-containing At4g18375	0.00111537	2.05749	1.93282	4.25327
HL.SW.v1.0.G033218	Zinc finger, RING-CH-type	2.20798e-08	2.77096	2.37099	7.02887
HL.SW.v1.0.G033309	Axonemal dynein light chain,	0.000221258	7.30764	0.135322	1.26361
HL.SW.v1.0.G033323	non-specific lipid-transfer 2-like	1.3176e-102	31.6503	0.741648	25.9186
HL.SW.v1.0.G033418	V-type proton ATPase subunit H	0.00365791	2.58031	0.777205	2.18131
HL.SW.v1.0.G033438	adenylate kinase 4	2.4301e-06	6.14559	0.326024	2.30061
HL.SW.v1.0.G033442	S-norcoclaurine synthase 1-like	0.00434359	3.85393	0.273145	1.21445
HL.SW.v1.0.G033478	Fatty acyl- reductase 3	1.53681e-08	20.8297	0.0644854	2.10123
HL.SW.v1.0.G033528	Sec14 cytosolic factor	8.7276e-09	2.43383	3.51443	9.11755
HL.SW.v1.0.G033637	chitinase LA-ab , partial	1.51233e-92	4.02881	21.6218	92.4915
HL.SW.v1.0.G033679	enoyl-[acyl-carrier- ] reductase [NADH] 1, chloroplastic-like	8.79798e-05	7.45096	0.169005	1.55484
HL.SW.v1.0.G033706	glutamate dehydrogenase 1	2.94179e-05	2.81045	1.29005	3.90549
HL.SW.v1.0.G033721	21 kDa -like	0.000131188	28.8855	0	0.955355
HL.SW.v1.0.G033801	probable serine incorporator	4.49195e-105	7.80563	3.99075	33.2691
HL.SW.v1.0.G033933	thioredoxin H2-like	1.43551e-05	2.12455	3.1069	7.03912
HL.SW.v1.0.G033979	protoporphyrinogen oxidase, mitochondrial isoform X1	4.59669e-15	5.18762	1.30244	7.30572
HL.SW.v1.0.G033986	probable 2-oxoglutarate-dependent dioxygenase At5g05600	4.22412e-05	3.21592	0.902452	3.1525
HL.SW.v1.0.G033997	probable lysophospholipase BODYGUARD 3	1.93022e-05	6.71613	0.244558	1.9383
HL.SW.v1.0.G034029	probable nuclear hormone receptor HR38 isoform X1	0.00195314	12.7545	0.0229837	0.71457
HL.SW.v1.0.G034031	CURVATURE THYLAKOID 1B, chloroplastic	0.00456175	2.31786	1.06408	2.66123
HL.SW.v1.0.G034044	NAC transcription factor 29-like	9.13689e-40	9.09205	1.49443	14.6875
HL.SW.v1.0.G034060	STRICTOSIDINE SYNTHASE-LIKE 4-like	1.27933e-06	3.38591	1.13936	4.17385
HL.SW.v1.0.G034081	sulfite exporter family 3-like	4.11531e-10	4.80214	0.911119	4.76914
HL.SW.v1.0.G034083	adenylate kinase 1, chloroplastic	1.8574e-10	2.40092	4.48545	11.4706
HL.SW.v1.0.G034105	PREDICTED: uncharacterized protein LOC109009582 isoform X1	4.79699e-07	3.44508	1.19052	4.4354
HL.SW.v1.0.G034178	patellin-3-like	4.64404e-16	2.0251	12.1973	26.2301
HL.SW.v1.0.G034209	plasma membrane ATPase 4	4.36136e-14	2.23429	7.71149	18.3143
HL.SW.v1.0.G034245	SAR DEFICIENT 1	3.15072e-12	4.79301	1.18216	6.13786
HL.SW.v1.0.G034251	Peroxidase 66	0.000324927	4.82716	0.303827	1.68823
HL.SW.v1.0.G034316	probable xyloglucan endotransglucosylase hydrolase 23	0.00148967	4.94158	0.210091	1.23675
HL.SW.v1.0.G034327	transcription factor HBP-1b(c38)-like	2.73844e-10	3.47352	1.78424	6.65822
HL.SW.v1.0.G034357	Two-component response regulator	2.37983e-09	2.23628	4.80349	11.4315
HL.SW.v1.0.G034401	vacuolar cation proton exchanger 3-like	0.00087794	3.69224	0.412411	1.70611
HL.SW.v1.0.G034467	ER lumen -retaining receptor-like	0.000234464	2.83935	0.92138	2.83485
HL.SW.v1.0.G034534	probable linoleate 9S-lipoxygenase 5	3.63639e-08	5.04467	0.677	3.76033
HL.SW.v1.0.G034574	probable amino acid permease 7 isoform X2	3.71711e-18	4.10475	2.41182	10.6087
HL.SW.v1.0.G034593	hypothetical protein L484_007260	2.83926e-06	3.59745	0.902127	3.5285
HL.SW.v1.0.G034604	EXORDIUM-like 3	8.19348e-38	2.4898	16.3813	43.3096
HL.SW.v1.0.G034608	CASP 2A1	5.2611e-96	5.07256	7.23441	39.0586
HL.SW.v1.0.G034626	linoleate 13S-lipoxygenase 2-1, chloroplastic-like	3.54295e-09	6.07151	0.550703	3.72222
HL.SW.v1.0.G034681	ABHD17B isoform X1	0.000422165	2.54962	1.16188	3.19477
HL.SW.v1.0.G034709	alanine--tRNA ligase	0.000488294	6.35777	0.170412	1.33227
HL.SW.v1.0.G034757	short-chain dehydrogenase TIC 32, chloroplastic-like	1.21152e-75	14.1641	1.37275	21.0701
HL.SW.v1.0.G034794	probable WRKY transcription factor 40	4.99146e-61	26.4237	0.525446	15.5873
HL.SW.v1.0.G034796	probable nucleoredoxin 1	1.09046e-229	8.0832	8.41245	72.3582
HL.SW.v1.0.G034945	DEAD-box ATP-dependent RNA helicase 50	0.00341801	10.841	0.0428109	0.830012
HL.SW.v1.0.G034950	hevamine-A	7.29552e-61	9.60011	1.91658	19.7949
HL.SW.v1.0.G035007	vacuolar sorting-associated 55 homolog	9.74063e-43	2.18384	28.4824	66.0021
HL.SW.v1.0.G035036	cyclin-C1-2-like	7.09707e-29	2.41775	13.3332	34.2304
HL.SW.v1.0.G035065	NAC domain-containing 90-like	0.000274664	14.4876	0.0418726	1.10715
HL.SW.v1.0.G035147	oxygen-evolving enhancer 2, chloroplastic	1.45498e-29	2.52865	180.625	484.422
HL.SW.v1.0.G035178	peptide methionine sulfoxide reductase A5	0.000460038	2.8456	0.929852	2.86889
HL.SW.v1.0.G035204	UDP-glycosyltransferase 89B2	5.43576e-05	2.19201	2.32268	5.43966
HL.SW.v1.0.G035256	crocetin glucosyltransferase, chloroplastic-like	0.00119329	3.22694	0.538643	1.91961
HL.SW.v1.0.G035316	B-cell receptor-associated 31	2.08045e-06	2.38698	2.50385	6.38669
HL.SW.v1.0.G035320	basic 7S globulin-like	7.6607e-07	8.74478	0.20049	2.1251
HL.SW.v1.0.G035342	nudix hydrolase 9	9.4313e-07	6.39527	0.350116	2.55866
HL.SW.v1.0.G035356	probable calcium-binding CML45	4.31991e-16	3.36641	3.18271	11.4438
HL.SW.v1.0.G035444	probable galactinol--sucrose galactosyltransferase 2	1.90946e-21	3.79322	3.38226	13.7039
HL.SW.v1.0.G035484	Galacturonosyltransferase 8	1.38569e-11	4.62319	1.1496	5.76156
HL.SW.v1.0.G035489	branched-chain-amino-acid aminotransferase 2, chloroplastic-like	2.77639e-17	112.501	0	3.81968
HL.SW.v1.0.G035569	Mannose glucose-specific lectin family	7.45113e-09	32.6693	0.0232774	1.8935
HL.SW.v1.0.G035577	vacuolar sorting-associated 24 homolog 1	0.00265483	2.0529	1.70765	3.74977
HL.SW.v1.0.G035597	tas	0.00067958	3.28544	0.578782	2.09633
HL.SW.v1.0.G035615	DNA polymerase delta subunit 4	1.03717e-08	2.01231	6.23456	13.3404
HL.SW.v1.0.G035641	CONSTANS-like 5	2.60709e-22	3.07086	5.7356	18.7472
HL.SW.v1.0.G035715	ABC transporter A family member 2	7.28934e-07	5.02058	0.551246	3.07282
HL.SW.v1.0.G035723	mitochondrial pyruvate carrier 1-like	1.77644e-30	35.0718	0.178203	7.78473
HL.SW.v1.0.G035729	ras-related RABH1e	0.000518808	10.3651	0.0667929	1.05482
HL.SW.v1.0.G035787	cell division cycle 48 homolog	3.89514e-23	2.21051	13.6579	32.0632
HL.SW.v1.0.G035819	laccase-7-like	2.3843e-07	34.3524	0.0109365	1.53982
HL.SW.v1.0.G035838	extracellular ribonuclease LE-like	0.00455151	2.96954	0.518914	1.70121
HL.SW.v1.0.G035990	probable beta-1,3-galactosyltransferase 14	4.63302e-05	2.37304	1.8762	4.76769
HL.SW.v1.0.G036000	aspartyl protease family At5g10770-like	5.00349e-25	26.9518	0.207963	6.8264
HL.SW.v1.0.G036058	phosphatase family	1.44869e-18	5.4751	1.49123	8.81156
HL.SW.v1.0.G036073	NAC domain-containing 72	1.12661e-19	18.3725	0.252394	5.5131
HL.SW.v1.0.G036086	, chloroplastic	4.10577e-33	3.26787	7.40738	25.7528
HL.SW.v1.0.G036098	COP9 signalosome complex subunit 4	6.0067e-08	2.53375	2.77145	7.49883
HL.SW.v1.0.G036120	eukaryotic translation initiation factor 2 subunit alpha homolog	4.37806e-12	2.86514	3.37735	10.3249
HL.SW.v1.0.G036128	auxin transporter 2	1.63894e-07	2.36397	3.19079	8.04796
HL.SW.v1.0.G036155	transcription factor VOZ1	1.53753e-05	4.3412	0.515141	2.48692
HL.SW.v1.0.G036220	UDP-glucose 6-dehydrogenase 1	0.00293515	3.25012	0.483472	1.74373
HL.SW.v1.0.G036226	probable xyloglucan endotransglucosylase hydrolase 30	2.38634e-05	3.99674	0.611509	2.69311
HL.SW.v1.0.G036279	spermidine coumaroyl- acyltransferase-like	4.37514e-16	30.0757	0.0983773	4.13358
HL.SW.v1.0.G036289	poly polymerase	2.34482e-11	4.52545	1.19241	5.84324
HL.SW.v1.0.G036312	monodehydroascorbate reductase	1.53512e-58	2.12074	41.182	92.6512
HL.SW.v1.0.G036348	gibberellin 2-beta-dioxygenase 8	0.00280708	2.04283	1.62135	3.54864
HL.SW.v1.0.G036357	CASP 2D1	0.00257687	5.7037	0.159757	1.12805
HL.SW.v1.0.G036361	formate dehydrogenase, mitochondrial	7.62004e-60	4.31992	7.10912	32.6827
HL.SW.v1.0.G036372	probable cyclic nucleotide-gated ion channel 5	0.000855466	6.34452	0.1648	1.29149
HL.SW.v1.0.G036471	oligopeptide transporter 3	0.000221258	8.30058	0.117703	1.28649
HL.SW.v1.0.G036576	Glycerol kinase	3.82512e-26	4.11903	3.56571	15.6814
HL.SW.v1.0.G036644	cytochrome P450 71A9-like	2.88205e-09	5.0095	0.766865	4.2102
HL.SW.v1.0.G036663	probable galacturonosyltransferase-like 1	0.000976578	11.3247	0.047439	0.924938
HL.SW.v1.0.G036689	Interactor of constitutive active ROPs 2	0.00040246	8.00843	0.115345	1.22078
HL.SW.v1.0.G036702	NAC domain-containing 69	1.89435e-21	2.9239	5.94782	18.5112
HL.SW.v1.0.G036816	Golgi SNAP receptor complex member 1-1	1.87032e-06	2.7232	1.79379	5.23994
HL.SW.v1.0.G036827	chorismate mutase 2	3.93951e-20	7.35524	0.989186	7.93634
HL.SW.v1.0.G036865	Uncharacterized oxidoreductase	1.2252e-16	2.97464	4.39661	13.9351
HL.SW.v1.0.G036903	pathogenesis-related genes transcriptional activator PTI6-like	3.84622e-05	3.79684	0.638753	2.66763
HL.SW.v1.0.G036928	spermidine coumaroyl- acyltransferase-like	1.0006e-11	33.3291	0.0497502	2.8633
HL.SW.v1.0.G036948	argonaute 5	8.70029e-06	3.9172	0.703802	3.02302
HL.SW.v1.0.G036959	bark storage A-like	1.0706e-14	3.04343	3.59044	11.6603
HL.SW.v1.0.G037042	acyl-lipid omega-3 desaturase (cytochrome b5), endoplasmic reticulum	0.0025633	2.97616	0.591031	1.93358
HL.SW.v1.0.G037058	dof zinc finger -like	0.00210247	3.46086	0.44302	1.70828
HL.SW.v1.0.G037075	Zinc finger CONSTANS-LIKE 5	0.000990717	2.00913	2.15251	4.62035
HL.SW.v1.0.G037081	phytoene synthase 2, chloroplastic-like	7.08379e-17	2.76341	5.25513	15.4581
HL.SW.v1.0.G037092	Aquaporin NIP1-2	1.13143e-171	57.721	0.657774	42.1865
HL.SW.v1.0.G037147	Dehydrogenase reductase SDR family member 7	1.05953e-08	2.22823	4.5818	10.8694
HL.SW.v1.0.G037201	probable aspartyl aminopeptidase	3.03255e-06	10.2088	0.13224	1.74912
HL.SW.v1.0.G037204	GATA transcription factor 5-like	6.88371e-10	4.7884	0.893433	4.6674
HL.SW.v1.0.G037209	methanol O-anthraniloyltransferase-like	0.000152121	2.80541	1.07795	3.26808
HL.SW.v1.0.G037241	probable histone	0.0002643	2.81425	1.01064	3.07496
HL.SW.v1.0.G037319	probable flavin-containing monooxygenase 1	0.000518808	11.7442	0.052324	1.02075
HL.SW.v1.0.G037384	probable carboxylesterase 120	9.29111e-106	6.20224	5.38493	35.5976
HL.SW.v1.0.G037394	26S proteasome non-ATPase regulatory subunit 8 homolog A	1.31842e-80	2.58891	32.0213	87.9517
HL.SW.v1.0.G037456	probable sugar phosphate phosphate translocator At3g14410	2.12191e-07	3.49007	1.16744	4.40574
HL.SW.v1.0.G037469	GDT1 3	4.62105e-19	2.56595	7.29831	19.916
HL.SW.v1.0.G037487	serine threonine- kinase BLUS1 isoform X1	0.0026674	2.41023	1.01166	2.6336
HL.SW.v1.0.G037511	peroxisomal membrane 11A	0.000773437	2.07397	2.03023	4.50245
HL.SW.v1.0.G037519	soluble inorganic pyrophosphatase 4	3.11107e-14	2.764	4.39046	12.9281
HL.SW.v1.0.G037565	hydrolase	0.000144962	10.8873	0.071573	1.16379
HL.SW.v1.0.G037575	cysteine ase COT44-like	0.000122072	28.7429	0	0.95001
HL.SW.v1.0.G037661	cyclic nucleotide-gated ion channel 1-like	4.30588e-50	14.3586	0.910966	14.3272
HL.SW.v1.0.G037663	NIM1-INTERACTING 1	1.61688e-61	8.63865	2.32445	21.5475
HL.SW.v1.0.G037693	Tubulin beta-1 chain	0.000523511	2.55004	1.20177	3.30269
HL.SW.v1.0.G037707	ECERIFERUM 3	3.15555e-36	3.14705	8.85029	29.6091
HL.SW.v1.0.G037717	gamma-interferon-inducible lysosomal thiol reductase	2.38518e-28	2.40373	13.37	34.1265
HL.SW.v1.0.G037776	Acid phosphatase 1	1.7303e-09	3.87369	1.3267	5.54762
HL.SW.v1.0.G037814	3-isopropylmalate dehydrogenase 2, chloroplastic-like	0.000813151	2.06798	1.93552	4.28113
HL.SW.v1.0.G037835	NADP-dependent malic enzyme	2.02728e-16	6.18877	1.04662	7.04561
HL.SW.v1.0.G037860	tetraspanin-2	1.79296e-98	4.50587	8.85926	42.4495
HL.SW.v1.0.G037865	probable disease resistance At4g33300	5.59486e-20	2.58916	7.52586	20.721
HL.SW.v1.0.G037882	plastid division PDV1 isoform X1	0.00131877	3.33609	0.475589	1.76271
HL.SW.v1.0.G037884	CIA30 domain-containing NAD_binding_10 domain-containing	2.12769e-12	2.72152	3.89314	11.293
HL.SW.v1.0.G037950	U-box domain-containing 30-like	0.000910545	4.70454	0.258101	1.41243
HL.SW.v1.0.G037979	Lysosomal beta glucosidase	1.04842e-06	3.77955	0.923994	3.79785
HL.SW.v1.0.G038030	ATP-dependent Clp protease ATP-binding subunit	8.83838e-05	2.99183	0.961622	3.11808
HL.SW.v1.0.G038095	mitogen-activated kinase kinase kinase 18-like	0.0040774	3.61783	0.331493	1.36179
HL.SW.v1.0.G038138	ankyrin repeat-containing At3g12360-like	2.18569e-23	6.51485	1.39874	9.85152
HL.SW.v1.0.G038175	probable xyloglucan endotransglucosylase hydrolase 23	0.0040774	3.51001	0.341236	1.35565
HL.SW.v1.0.G038224	Aquaporin PIP1-1	1.1948e-102	7.84448	31.0097	258.211
HL.SW.v1.0.G038240	GDSL esterase lipase At3g48460	7.37801e-154	11.03	3.82168	45.0416
HL.SW.v1.0.G038258	lectin-domain containing receptor kinase -like	0.000426746	2.1148	1.94913	4.40903
HL.SW.v1.0.G038275	ferrochelatase-2, chloroplastic	1.62579e-07	3.04022	1.62058	5.29518
HL.SW.v1.0.G038387	Cytochrome P450 704C1	0.00195314	19.9935	0	0.650313
HL.SW.v1.0.G038404	GTP-binding At2g22870	0.000307117	2.20319	1.90115	4.48227
HL.SW.v1.0.G038416	very-long-chain enoyl- reductase-like	8.56695e-08	2.8208	2.09953	6.3433
HL.SW.v1.0.G038500	acetyltransferase NSI	2.30064e-12	6.57098	0.689681	4.99107
HL.SW.v1.0.G038528	cationic amino acid transporter 9, chloroplastic	3.05183e-05	32.5938	0	1.08264
HL.SW.v1.0.G038555	UDP-glucuronate:xylan alpha-glucuronosyltransferase 2 isoform X2	4.79504e-05	2.67171	1.39754	4.01506
HL.SW.v1.0.G038614	NRT1 PTR FAMILY isoform X1	1.54517e-08	3.18699	1.74015	5.95521
HL.SW.v1.0.G038647	endoplasmic reticulum oxidoreductin-1-like	4.92355e-05	6.69421	0.200607	1.61865
HL.SW.v1.0.G038672	probable uridine nucleosidase 2	1.09588e-05	2.05235	3.45906	7.56308
HL.SW.v1.0.G038710	homogentisate phytyltransferase 1, chloroplastic isoform X2	0.00119329	3.23741	0.538807	1.9252
HL.SW.v1.0.G038796	glutamate-1-semialdehyde 2,1-aminomutase 2, chloroplastic-like	4.34572e-05	2.1286	2.64898	6.01955
HL.SW.v1.0.G038830	acyl carrier 1, mitochondrial	2.80383e-116	2.62578	42.1496	117.413
HL.SW.v1.0.G038881	ABC transporter G family member 11	1.2645e-06	2.27239	3.0675	7.4362
HL.SW.v1.0.G038908	F-box kelch-repeat At1g22040-like	0.00030697	2.77415	0.96467	2.90041
HL.SW.v1.0.G038989	sulfated surface glyco 185-like	3.30877e-11	5.08531	0.944899	5.23765
HL.SW.v1.0.G038997	BOI-related E3 ubiquitin- ligase 1	0.00255418	2.16134	1.41943	3.29336
HL.SW.v1.0.G039051	berberine bridge enzyme-like 26	0.000156527	7.56277	0.15821	1.49161
HL.SW.v1.0.G039066	nudix hydrolase 2-like isoform X2	4.74321e-36	4.56137	4.15784	20.2402
HL.SW.v1.0.G039129	glutamyl-trna reductase 1, chloroplastic	0.00040246	7.6789	0.123163	1.23322
HL.SW.v1.0.G039132	HVA22 k	7.27166e-10	3.43407	1.72778	6.37365
HL.SW.v1.0.G039180	IQ-DOMAIN 1-like	0.00265003	2.07177	1.70401	3.7807
HL.SW.v1.0.G039345	26S protease regulatory subunit 6A homolog	3.09476e-58	2.18554	37.3713	86.6562
HL.SW.v1.0.G039357	glutathione reductase, chloroplastic	0.00428201	2.05597	1.37844	3.04073
HL.SW.v1.0.G039471	probable inactive poly [ADP-ribose] polymerase SRO3	0.000448995	2.25924	1.67528	4.05544
HL.SW.v1.0.G039478	BTB POZ domain-containing At1g21780	3.02147e-38	2.87137	11.5465	35.2271
HL.SW.v1.0.G039573	ninja-family AFP3-like	0.00249398	3.99966	0.310548	1.41984
HL.SW.v1.0.G039733	polygalacturonase-inhibiting	0.00012112	7.17032	0.152501	1.3722
HL.SW.v1.0.G039737	beta-glucosidase 40	4.19371e-05	4.01658	0.530045	2.3595
HL.SW.v1.0.G039770	rhomboid 20	5.0267e-08	2.01463	5.63385	12.0682
HL.SW.v1.0.G039803	transcription factor MYB44-like	1.43003e-05	5.18331	0.387237	2.27064
HL.SW.v1.0.G039822	probable aquaporin PIP1-2	1.2688e-40	3.4979	7.8986	29.3835
HL.SW.v1.0.G039825	F-box kelch-repeat At1g23390	1.29227e-09	2.48079	3.72426	9.84721
HL.SW.v1.0.G039858	ranBP2-type zinc finger At1g67325 isoform X1	0.00293515	3.24692	0.490866	1.76593
HL.SW.v1.0.G040003	probable WRKY transcription factor 40	8.172e-05	3.29952	0.782512	2.81409
HL.SW.v1.0.G040014	UDP-galactose UDP-glucose transporter 3	4.80215e-12	2.30078	5.89771	14.4352
HL.SW.v1.0.G040020	methyl- -binding domain-containing 11	4.75082e-82	2.16212	52.6491	120.76
HL.SW.v1.0.G040057	alpha-amylase-like isoform X1	3.17724e-15	28.4305	0.098869	3.9214
HL.SW.v1.0.G040106	ADP-ribosylation factor 2	2.20554e-20	2.97274	5.5106	17.4397
HL.SW.v1.0.G040123	LEAF RUST 10 DISEASE-RESISTANCE LOCUS RECEPTOR-LIKE PROTEIN KINASE-like isoform X2	3.76101e-05	3.26304	0.932275	3.30373
HL.SW.v1.0.G040140	aldo-keto reductase family 4 member C9-like	7.00138e-22	2.28072	11.7731	28.518
HL.SW.v1.0.G040292	ADP,ATP carrier , mitochondrial	2.7227e-15	3.29197	3.1437	11.0548
HL.SW.v1.0.G040381	CLP protease regulatory subunit CLPX3, mitochondrial	0.00255475	2.13551	1.44179	3.30229
HL.SW.v1.0.G040385	NAD(P)H-quinone oxidoreductase subunit O, chloroplastic	8.74598e-07	2.00244	4.78516	10.1969
HL.SW.v1.0.G040431	F-box SKIP16	0.00219242	2.23114	1.34298	3.21877
HL.SW.v1.0.G040437	calmodulin-binding receptor-like cytoplasmic kinase 2	4.71088e-05	3.25914	0.844314	2.99526
HL.SW.v1.0.G040464	3-ketoacyl- synthase 1	8.78597e-16	6.02303	1.02598	6.72231
HL.SW.v1.0.G040472	serine-threonine kinase, plant-type,	2.0579e-18	10.4316	0.519237	6.06389
HL.SW.v1.0.G040504	probable N-acetyltransferase HLS1	8.86424e-16	14.5389	0.263868	4.5276
HL.SW.v1.0.G040538	DNAse I-like superfamily	0.00148967	5.20736	0.192719	1.20895
HL.SW.v1.0.G040592	chaperonin-like 2, chloroplastic isoform X2	3.74066e-06	2.53177	2.00776	5.44059
HL.SW.v1.0.G040597	calcium-dependent lipid-binding	2.02608e-06	2.49691	2.33663	6.23755
HL.SW.v1.0.G040629	rust resistance kinase Lr10-like	0.00131228	5.599	0.157655	1.0926
HL.SW.v1.0.G040637	probable xyloglucan endotransglucosylase hydrolase 6	9.40115e-08	2.12855	126.575	285.776
HL.SW.v1.0.G040717	mitogen-activated kinase 15 isoform X1	1.57189e-05	3.19856	0.973083	3.37465
HL.SW.v1.0.G040739	thioredoxin-like 1-1, chloroplastic	1.30444e-06	2.02931	4.26055	9.2035
HL.SW.v1.0.G040905	inorganic pyrophosphatase 1-like	0.00249398	3.72634	0.340817	1.44111
HL.SW.v1.0.G040929	Plasma membrane isoform 1	1.4057e-08	4.66805	0.819604	4.18188
HL.SW.v1.0.G040946	non-specific lipid transfer GPI-anchored 1	4.18656e-12	2.502	5.84438	15.55
HL.SW.v1.0.G040948	phosphoglycerate mutase 4	3.38742e-13	2.62141	4.56243	12.737
HL.SW.v1.0.G040977	NAC domain-containing 2	5.41336e-30	7.87608	1.3738	11.7117
HL.SW.v1.0.G041011	nicalin-1 isoform X2	0.000821427	3.69033	0.452229	1.86175
HL.SW.v1.0.G041034	F-box SKIP27-like	2.75271e-16	2.90171	4.56931	14.1261
HL.SW.v1.0.G041094	probable serine threonine- kinase Cx32, chloroplastic	1.3665e-05	2.4646	2.02258	5.33687
HL.SW.v1.0.G041126	cathepsin B	6.12237e-39	3.10513	9.8155	32.3943
HL.SW.v1.0.G041186	ankyrin repeat-containing ITN1-like isoform X1	0.00017514	3.15665	0.810583	2.78823
HL.SW.v1.0.G041211	cysteine synthase-like isoform X2	1.38078e-22	52.3954	0.0655014	5.40011
HL.SW.v1.0.G041231	E3 ubiquitin- ligase RNF4	5.83326e-12	8.34008	0.466024	4.3736
HL.SW.v1.0.G041260	general transcription factor IIE subunit 1 isoform X1	2.27233e-07	9.39754	0.199196	2.27249
HL.SW.v1.0.G041347	2,3-bisphosphoglycerate-dependent phosphoglycerate mutase	4.40648e-08	8.66912	0.277517	2.81634
HL.SW.v1.0.G041385	sm LSM7	1.04324e-37	2.16925	24.3506	56.0531
HL.SW.v1.0.G041399	alkane hydroxylase MAH1-like	5.43645e-14	3.45716	2.55665	9.455
HL.SW.v1.0.G041438	patatin 2	9.3988e-171	5.02145	11.6933	62.3981
HL.SW.v1.0.G041439	patatin 2	2.37804e-35	9.29161	1.39898	14.0659
HL.SW.v1.0.G041441	calcium-binding CML24-like	7.9275e-08	3.52113	1.23645	4.70077
HL.SW.v1.0.G041454	suppressor of mec-8 and unc-52 homolog 2-like	0.00195314	21.6975	0	0.708936
HL.SW.v1.0.G041482	PREDICTED: uncharacterized protein LOC103444905 isoform X1	0.000151097	2.01212	2.65793	5.70582
HL.SW.v1.0.G041497	probable 2-oxoglutarate-dependent dioxygenase At3g49630 isoform X1	0.000855466	5.01552	0.214119	1.27532
HL.SW.v1.0.G041531	beta-amyrin synthase	0.000976573	23.5574	0	0.772816
HL.SW.v1.0.G041548	SODIUM POTASSIUM ROOT DEFECTIVE 2-like	2.71947e-05	3.22341	0.918274	3.2151
HL.SW.v1.0.G041557	axial regulator YABBY 1-like	2.76182e-110	5.21307	13.7556	76.1863
HL.SW.v1.0.G041558	axial regulator YABBY 1	1.02213e-07	4.3211	0.853495	4.02678
HL.SW.v1.0.G041567	sulfite exporter family 3-like	8.26659e-08	2.38262	3.3112	8.41311
HL.SW.v1.0.G041635	3-oxoacyl-[acyl-carrier- ] reductase 4	1.40657e-08	4.71256	0.799282	4.12343
HL.SW.v1.0.G041636	TLC domain-containing At5g14285-like	1.07696e-09	32.803	0.03795	2.4098
HL.SW.v1.0.G041755	GDSL esterase lipase CPRD49	0.000111588	2.2694	1.94315	4.72117
HL.SW.v1.0.G041869	phospholipid-transporting ATPase 9	0.0021903	2.57175	0.942106	2.62216
HL.SW.v1.0.G041930	sphinganine C4-monooxygenase 1-like	2.09894e-07	6.21733	0.419879	2.94804
HL.SW.v1.0.G041959	GDSL esterase lipase At2g42990-like	2.82239e-122	139.963	0.162869	28.9683
HL.SW.v1.0.G042080	zinc transporter 5	0.000523279	2.49119	1.22166	3.27825
HL.SW.v1.0.G042081	probable pectate lyase 8	2.09677e-59	3.42995	12.2013	44.4647
HL.SW.v1.0.G042136	Serine carboxypeptidase-like 25	0.000132816	2.35451	1.72986	4.36588
HL.SW.v1.0.G042179	major allergen Pru ar 1-like	8.42819e-143	4.45789	11.577	54.8478
HL.SW.v1.0.G042189	ribulose bisphosphate carboxylase small chain, chloroplastic-like	1.93899e-22	32.5928	0.132587	5.66871
HL.SW.v1.0.G042195	lipid phosphate phosphatase delta	1.06901e-07	3.1234	1.59258	5.35086
HL.SW.v1.0.G042381	probable serine threonine- kinase WNK4 isoform X1	1.32942e-05	2.16268	2.84247	6.55977
HL.SW.v1.0.G042390	probable sphingolipid transporter spinster homolog 2	0.000976573	23.1604	0	0.758923
HL.SW.v1.0.G042393	mitochondrial carnitine acylcarnitine carrier	1.0879e-15	2.3842	7.2628	18.4134
HL.SW.v1.0.G042413	cytochrome P450 71A22	0.000976573	23.1676	0	0.758968
HL.SW.v1.0.G042452	transcription factor BIM2 isoform X1	0.00131877	3.59086	0.445274	1.78441
HL.SW.v1.0.G042468	mannose glucose-specific lectin-like	0.00195314	21.4864	0	0.701672
HL.SW.v1.0.G042574	serine threonine- kinase	0.00434359	3.79192	0.27866	1.21569
HL.SW.v1.0.G042589	shikimate O-hydroxycinnamoyltransferase	5.41362e-23	25.6666	0.190167	6.01732
HL.SW.v1.0.G042591	Calcium-binding EF-hand	9.36617e-28	13.258	0.600685	8.86019
HL.SW.v1.0.G042691	P-loop nucleoside triphosphate hydrolase superfamily	2.43441e-05	4.88008	0.394458	2.1734
HL.SW.v1.0.G042698	signal recognition particle receptor subunit beta-like	4.04698e-42	3.58672	7.80232	29.7626
HL.SW.v1.0.G042713	secoisolariciresinol dehydrogenase	0.00036745	2.20899	1.85903	4.39712
HL.SW.v1.0.G042807	dynein light chain, cytoplasmic-like	3.54295e-09	6.05394	0.552564	3.71925
HL.SW.v1.0.G042810	Ubiquitin-conjugating enzyme E2 11	9.06417e-06	4.1257	0.628672	2.85645
HL.SW.v1.0.G042819	AT-rich interactive domain-containing 5	6.97478e-08	6.03672	0.45643	3.09381
HL.SW.v1.0.G042879	Serine carboxypeptidase 24	0.000122072	28.589	0	0.944663
HL.SW.v1.0.G042906	TIC 20-I, chloroplastic-like	0.00018087	2.04106	2.56312	5.58356
HL.SW.v1.0.G042930	bifunctional riboflavin biosynthesis RIBA 1, chloroplastic-like	4.98472e-06	2.2644	2.70381	6.53735
HL.SW.v1.0.G042957	1-aminocyclopropane-1-carboxylate oxidase homolog 1	2.54876e-24	5.33684	2.04285	11.7074
HL.SW.v1.0.G043064	allene oxide cyclase 4, chloroplastic	0.00257687	4.97274	0.19931	1.1878
HL.SW.v1.0.G043096	BRANCHLESS TRICHOME	4.05634e-05	4.09938	0.561859	2.552
HL.SW.v1.0.G043170	PAL2, partial	1.12681e-10	18.2475	0.115798	2.83503
HL.SW.v1.0.G043186	ribosomal S3 (chloroplast)	1.125e-07	2.60387	2.51143	6.98916
HL.SW.v1.0.G043197	S-adenosylmethionine synthase 1	2.31008e-57	36.3237	2.2038	86.0597
HL.SW.v1.0.G043238	bZIP transcription factor	0.00080238	2.72951	0.900884	2.6666
HL.SW.v1.0.G043275	CTD small phosphatase 2-A isoform X1	8.22058e-06	3.86163	0.741158	3.13458
HL.SW.v1.0.G043288	4-coumarate-- ligase-like 1	1.32707e-26	174.284	0	5.93521
HL.SW.v1.0.G043303	Peptidyl-prolyl cis-trans isomerase CYP19-4	0.000106052	3.91834	0.549336	2.38171
HL.SW.v1.0.G043309	choline ethanolaminephosphotransferase 1	1.50983e-05	4.9963	0.420058	2.3621
HL.SW.v1.0.G043341	cytochrome c oxidase assembly COX15	0.000546131	4.39343	0.332206	1.66344
HL.SW.v1.0.G043354	26S protease regulatory subunit 8 homolog A	8.77335e-09	2.84249	2.39076	7.27435
HL.SW.v1.0.G043355	Serine-threonine kinase receptor-associated	1.42107e-25	2.4971	10.7952	28.6387
HL.SW.v1.0.G043402	Hydroxycinnamoyl-Coenzyme A shikimate quinate hydroxycinnamoyltransferase	9.02217e-05	3.37762	0.719803	2.66033
HL.SW.v1.0.G043441	alpha-amylase-like isoform X1	9.84135e-17	23.2027	0.15553	4.58531
HL.SW.v1.0.G043451	desumoylating isopeptidase 1	2.16407e-07	2.1787	3.98326	9.2441
HL.SW.v1.0.G043521	FT-interacting 1-like	0.000219998	2.24572	1.9151	4.60531
HL.SW.v1.0.G043593	probable phosphatase 2C 60 isoform X1	0.000221258	8.51931	0.117309	1.3184
HL.SW.v1.0.G043605	glutamate decarboxylase	2.94338e-22	8.24856	0.930534	8.38914
HL.SW.v1.0.G043654	L-ascorbate oxidase	3.89211e-10	9.15449	0.312196	3.3108
HL.SW.v1.0.G043711	probable WRKY transcription factor 7	5.12943e-06	2.09078	3.42272	7.62718
HL.SW.v1.0.G043743	vestitone reductase-related family	0.000910545	5.11432	0.236216	1.4209
HL.SW.v1.0.G043776	E3 ubiquitin- ligase MARCH8	0.00491613	2.11908	1.37716	3.13501
HL.SW.v1.0.G043787	Transcription factor ORG2	0.000976573	23.688	0	0.777135
HL.SW.v1.0.G043831	wall-associated receptor kinase-like 1	9.97285e-05	2.00273	2.91434	6.22427
HL.SW.v1.0.G043988	senescence-specific cysteine protease SAG39-like	3.90335e-36	7.13588	1.96871	15.1122
HL.SW.v1.0.G043989	Fruit bromelain	3.80374e-11	11.728	0.243661	3.39992
HL.SW.v1.0.G044000	major allergen Pru ar 1-like	1.10262e-30	10.7029	0.889493	10.4244
HL.SW.v1.0.G044044	lignin-forming anionic peroxidase-like	6.61944e-09	2.29003	4.28622	10.4542
HL.SW.v1.0.G044064	probable enoyl- hydratase 1, peroxisomal	0.00257687	5.85053	0.157254	1.14303
HL.SW.v1.0.G044211	far upstream element-binding 2-like	0.000113079	4.67157	0.34528	1.83613
HL.SW.v1.0.G044257	aquaporin SIP1-1-like	1.30161e-14	4.89262	1.34661	7.12145
HL.SW.v1.0.G044301	Aspartic ase nepenthesin-1	0.000912262	4.39478	0.305144	1.53881
HL.SW.v1.0.G044333	probable phosphatase 2C 25	1.75429e-10	8.87193	0.352014	3.58283
HL.SW.v1.0.G044356	General transcription factor IIH subunit 2	0.000127548	3.27831	0.760875	2.7257
HL.SW.v1.0.G044375	21 kDa	2.04268e-26	11.82	0.665928	8.72072
HL.SW.v1.0.G044420	anthranilate phosphoribosyltransferase, chloroplastic	1.65896e-23	2.70833	7.99262	23.0094
HL.SW.v1.0.G044451	probable dolichyl pyrophosphate Man9 c2 alpha-1,3-glucosyltransferase	6.6191e-05	5.09823	0.321087	1.8758
HL.SW.v1.0.G044478	transcription factor bHLH113	3.01635e-06	3.7403	0.83507	3.40884
HL.SW.v1.0.G044558	HEAT-STRESS-ASSOCIATED 32	2.04625e-25	3.61942	4.53926	17.5269
HL.SW.v1.0.G044638	GATA transcription factor 11-like	3.00854e-06	2.31606	2.73589	6.76246
HL.SW.v1.0.G044649	uncharacterized oxidoreductase At4g09670-like	3.37074e-15	8.46545	0.5927	5.57782
HL.SW.v1.0.G044662	chalcone synthase (CHS2)	0.00442512	5.312	0.163681	1.06909
HL.SW.v1.0.G044670	glutamate receptor -like	0.000546131	4.21768	0.344192	1.64964
HL.SW.v1.0.G044725	UPF0235 At5g63440 isoform X1	1.51038e-06	2.34585	2.7479	6.88187
HL.SW.v1.0.G044771	E3 ubiquitin ligase BIG BROTHER-related	1.83336e-20	4.2088	2.60909	11.757
HL.SW.v1.0.G044787	dolichol kinase EVAN isoform X2	0.000861839	2.66124	0.990116	2.85153
HL.SW.v1.0.G044863	ABSCISIC ACID-INSENSITIVE 5	0.000122072	18.0288	0.0187618	0.943243
HL.SW.v1.0.G044898	CBL-interacting serine threonine- kinase 25	0.00109676	2.33263	1.31966	3.30981
HL.SW.v1.0.G044899	probable carboxylesterase 8	6.88496e-37	4.18209	4.99798	22.2787
HL.SW.v1.0.G044910	AAA-ATPase ASD, mitochondrial-like	1.02594e-07	9.30887	0.228822	2.54145
HL.SW.v1.0.G044926	Sucrose synthase	0.00176929	2.55614	0.904741	2.50651
HL.SW.v1.0.G044963	NADH-ubiquinone oxidoreductase kDa subunit	5.77895e-05	3.06854	0.957143	3.18529
HL.SW.v1.0.G044972	casein kinase 1 2	1.30897e-08	6.46676	0.452942	3.2944
HL.SW.v1.0.G045009	monoglyceride lipase-like	2.2529e-05	2.48721	1.85604	4.94334
HL.SW.v1.0.G045014	Glutathione S-transferase U17	1.35831e-89	4.66384	7.58609	37.6444
HL.SW.v1.0.G045034	receptor kinase At1g72540	3.60758e-16	20.3152	0.174251	4.41786
HL.SW.v1.0.G045109	PHD finger ING2	2.09143e-11	6.45516	0.659712	4.70002
HL.SW.v1.0.G045147	ase inhibitor	0.00183108	12.4361	0.0360303	0.865814
HL.SW.v1.0.G045160	Glyoxysomal fatty acid beta-oxidation multifunctional MFP-a	4.126e-05	5.16866	0.354968	2.09117
HL.SW.v1.0.G045194	RING-H2 finger ATL3	3.02174e-09	11.7681	0.186553	2.69485
HL.SW.v1.0.G045248	metallothiol transferase	1.34734e-63	51.5243	0.25226	15.5178
HL.SW.v1.0.G045277	ethylene-responsive transcription factor ERF027	2.49977e-07	6.82731	0.329048	2.58258
HL.SW.v1.0.G045298	dynamin-related 4C-like	1.27591e-21	5.50839	1.7112	10.1504
HL.SW.v1.0.G045302	ORM1 2	1.81606e-19	2.2922	10.1966	24.8282
HL.SW.v1.0.G045322	heavy metal-associated isoprenylated plant 3	0.00390628	10.2411	0.0245039	0.583486
HL.SW.v1.0.G045323	pheophorbide a oxygenase, chloroplastic	4.44566e-10	2.31864	4.6959	11.5898
HL.SW.v1.0.G045403	Enolase	1.84161e-18	14.8491	0.315542	5.44421
HL.SW.v1.0.G045404	RING-H2 finger ATL52-like	1.03692e-07	4.69222	0.733982	3.77606
HL.SW.v1.0.G045480	AP2-like ethylene-responsive transcription factor At1g16060	1.77678e-15	65.7452	0.0168909	3.39257
HL.SW.v1.0.G045529	sugar transport 13	2.25937e-33	5.83943	2.47384	15.4778
HL.SW.v1.0.G045546	endochitinase EP3-like	0.000100505	3.20617	0.863049	3.01212
HL.SW.v1.0.G045628	elongation factor 1-alpha	4.38376e-96	4.51443	25.8966	124.065
HL.SW.v1.0.G045641	RING-H2 finger ATL78	0.00380182	2.46232	0.894641	2.38749
HL.SW.v1.0.G045675	CBS domain-containing CBSX3, mitochondrial	0.00040246	7.01525	0.140206	1.2501
HL.SW.v1.0.G045683	sm LSM2	9.74053e-54	2.18306	34.4057	79.693
HL.SW.v1.0.G045737	ABC transporter G family member 29-like	0.00187829	3.52556	0.477057	1.86975
HL.SW.v1.0.G045754	phenazine biosynthesis family	6.87756e-05	3.95339	0.524252	2.29757
HL.SW.v1.0.G045788	acetylornithine deacetylase	2.73012e-14	2.23874	7.76943	18.4894
HL.SW.v1.0.G045805	DNA damage-inducible 1	3.18599e-08	2.53175	2.98636	8.07152
HL.SW.v1.0.G045837	Nuclear pore complex	0.00308781	2.66236	0.798556	2.31259
HL.SW.v1.0.G045867	beta-amyrin synthase	1.51261e-12	9.75561	0.370657	4.13808
HL.SW.v1.0.G045911	24-methylenesterol C-methyltransferase 2	5.50392e-56	4.12695	29.5383	129.394
HL.SW.v1.0.G045959	endonuclease 2	8.68048e-07	9.84342	0.150704	1.87676
HL.SW.v1.0.G045965	glutathione S-transferase DHAR2-like	1.37863e-45	2.27616	25.8415	62.4132
HL.SW.v1.0.G046001	charged multivesicular body 7 isoform X1	0.00434359	4.06042	0.267315	1.25558
HL.SW.v1.0.G046042	nudix hydrolase 18, mitochondrial-like	1.6841e-33	219.966	0	7.50199
HL.SW.v1.0.G046194	adenosylhomocysteinase	8.77508e-09	2.82394	2.40846	7.27783
HL.SW.v1.0.G046220	E3 ubiquitin- ligase MARCH2	4.50442e-15	2.89417	4.20128	12.962
HL.SW.v1.0.G046239	proteasome subunit alpha type-2-A	6.51946e-14	2.63303	4.897	13.7262
HL.SW.v1.0.G046305	glucan endo-1,3-beta-glucosidase 14-like	1.81409e-12	4.9179	1.1386	6.07464
HL.SW.v1.0.G046338	probable LRR receptor-like serine threonine- kinase At1g05700	4.40648e-08	7.90327	0.308071	2.81968
HL.SW.v1.0.G046348	uncharacterized membrane At1g16860	4.92355e-05	7.99995	0.166575	1.65321
HL.SW.v1.0.G046375	clavaminate synthase At3g21360	1.08125e-54	2.26733	31.3503	75.4283
HL.SW.v1.0.G046401	serine threonine- kinase SAPK3-like	0.0025633	2.93308	0.588657	1.89681
HL.SW.v1.0.G046425	Zinc finger CCCH domain-containing 6	1.92864e-05	2.19379	2.583	6.0504
HL.SW.v1.0.G046495	LAG1 longevity assurance homolog 2	0.00380182	2.38094	0.913684	2.35595
HL.SW.v1.0.G046546	B-cell receptor-associated 31	4.11316e-14	2.18337	8.21929	19.0721
HL.SW.v1.0.G046644	B-cell receptor-associated	2.12809e-32	9.47178	1.12606	11.5986
HL.SW.v1.0.G046706	Uncharacterized protein L484_019585	4.37917e-06	2.99337	1.37509	4.43408
HL.SW.v1.0.G046707	probable inactive purple acid phosphatase 29	3.83217e-11	3.10088	2.50339	8.3052

## Sheet: Down-regulated
Feature ID	Annotations	P-value	Fold change	Control (FPKM)	Infected (FPKM)
HL.SW.v1.0.G000015	probable glutathione S-transferase	1.638e-33	-4.19095	18.8061	4.73324
HL.SW.v1.0.G000045	ubiquitin receptor RAD23b-like	2.84429e-09	-2.24127	10.6025	4.99731
HL.SW.v1.0.G000059	gamma-tubulin complex component 2 isoform X1	8.6979e-14	-6.0254	5.61681	0.960118
HL.SW.v1.0.G000060	RNA polymerase sigma factor sigA	2.3682e-08	-3.07836	5.59973	1.90556
HL.SW.v1.0.G000061	50S ribosomal L27-like	5.69455e-06	-2.91289	3.93958	1.41173
HL.SW.v1.0.G000087	probable calcium-binding CML16	3.35534e-05	-32.4303	1.01277	0
HL.SW.v1.0.G000113	PREDICTED: uncharacterized protein At4g14450, chloroplastic	4.47785e-05	-2.85376	3.29943	1.20338
HL.SW.v1.0.G000152	hypothetical protein L484_015323	6.05041e-36	-2.0243	58.0486	30.3943
HL.SW.v1.0.G000226	dual specificity phosphatase 1 isoform X1	0.00149634	-2.53184	2.53639	1.04116
HL.SW.v1.0.G000264	Patatin group A-3	2.60418e-31	-2.47025	33.7947	14.4883
HL.SW.v1.0.G000389	40S ribosomal S14-3	2.0507e-07	-2.11988	9.14066	4.55586
HL.SW.v1.0.G000443	hypothetical protein L484_027126	0.000126875	-2.01906	5.58766	2.9172
HL.SW.v1.0.G000520	DNA replication complex GINS SLD5 isoform X1	9.78659e-07	-2.83333	4.99181	1.84619
HL.SW.v1.0.G000548	late embryogenesis abundant 1-like	3.93316e-48	-7.21755	18.605	2.70439
HL.SW.v1.0.G000603	SAP domain-containing , isoform 1	0.00131105	-2.27819	3.08145	1.41549
HL.SW.v1.0.G000668	ERBB-3 BINDING PROTEIN 1	1.64675e-19	-2.7371	17.1298	6.61439
HL.SW.v1.0.G000671	eukaryotic translation initiation factor 2A	0.00080238	-2.66709	2.50328	0.973959
HL.SW.v1.0.G000700	ATP synthase CF0 subunit I (chloroplast)	2.22415e-07	-2.55958	6.31601	2.59589
HL.SW.v1.0.G000712	cytochrome P450 CYP736A12-like	8.63303e-13	-2.97869	9.7378	3.44437
HL.SW.v1.0.G000715	rho GTPase-activating gacII-like	6.95361e-06	-2.57124	4.66648	1.9035
HL.SW.v1.0.G000789	hypothetical protein Csa_5G146940	2.62309e-60	-3.14673	46.8793	15.7747
HL.SW.v1.0.G000962	CBS domain-containing CBSCBSPB3 isoform X1	1.42471e-28	-2.26532	35.6862	16.6853
HL.SW.v1.0.G000980	Ribosomal L25 L23	1.6741e-14	-18.1138	3.99455	0.201782
HL.SW.v1.0.G001095	carbamoyl-phosphate synthase large chain, chloroplastic	0.000453231	-2.31174	3.6421	1.65131
HL.SW.v1.0.G001227	dessication-induced 1VOC superfamily	1.96622e-54	-5.76481	22.7364	4.15551
HL.SW.v1.0.G001228	ubiquitin-conjugating enzyme E2 7	4.11192e-29	-3.17488	21.5624	7.17898
HL.SW.v1.0.G001232	indeterminate-domain 7-like	0.0018634	-2.24595	3.00986	1.40217
HL.SW.v1.0.G001233	alternative NAD(P)H-ubiquinone oxidoreductase C1, chloroplastic mitochondrial	9.80121e-06	-2.19208	6.08518	2.92364
HL.SW.v1.0.G001257	cytokinin riboside 5 -monophosphate phosphoribohydrolase LOG8	0.0021903	-2.43223	2.47711	1.06014
HL.SW.v1.0.G001269	phosphoglycolate phosphatase-like	0.00308781	-2.61807	2.20038	0.870114
HL.SW.v1.0.G001370	WVD2-like 3	0.000621081	-2.8785	2.49533	0.896575
HL.SW.v1.0.G001469	MLP 31	0.00087794	-3.65402	1.61451	0.443739
HL.SW.v1.0.G001539	signal recognition particle receptor subunit alpha homolog	1.52118e-08	-2.32402	8.87378	4.02989
HL.SW.v1.0.G001568	DETOXIFICATION 40	5.71564e-08	-2.3633	7.82827	3.49293
HL.SW.v1.0.G001600	magnesium transporter MRS2-11, chloroplastic isoform X1	8.32214e-11	-2.06691	15.195	7.7768
HL.SW.v1.0.G001635	pentatricopeptide repeat-containing At3g04130, mitochondrial	0.00418096	-6.60009	0.905819	0.116533
HL.SW.v1.0.G001636	E3 ubiquitin- ligase mib1	7.34244e-05	-2.14989	5.31515	2.60395
HL.SW.v1.0.G001651	hypothetical protein L484_008432	0.000107656	-2.41423	3.87274	1.68106
HL.SW.v1.0.G001711	L-ascorbate peroxidase, cytosolic	6.64324e-68	-2.9773	122.154	43.4844
HL.SW.v1.0.G001716	patatin 2	9.09028e-18	-2.64484	16.3957	6.55218
HL.SW.v1.0.G001769	E3 ubiquitin- ligase MARCH10	3.69914e-27	-2.96468	21.9016	7.81181
HL.SW.v1.0.G001804	membrane family	0	-2.31496	238.485	109.26
HL.SW.v1.0.G001871	Leucine-rich repeat structural ORF147 isoform 1	0.0031854	-2.39097	2.39502	1.04193
HL.SW.v1.0.G001940	40S ribosomal S5	5.27897e-17	-2.6381	15.872	6.35945
HL.SW.v1.0.G001960	transcription factor UNE12	0.000440167	-2.19173	4.02586	1.92912
HL.SW.v1.0.G001971	UPF0047 isoform X1	1.42852e-72	-3.7813	104.266	29.2135
HL.SW.v1.0.G002000	E3 ubiquitin- ligase RHB1A	0.000199544	-2.09575	4.95262	2.48854
HL.SW.v1.0.G002052	60S ribosomal L14-1-like	8.07695e-36	-2.12845	51.7997	25.7859
HL.SW.v1.0.G002098	chaperonin-like RBCX 1, chloroplastic	0.000226902	-2.6368	3.06367	1.21124
HL.SW.v1.0.G002197	phospho-2-dehydro-3-deoxyheptonate aldolase 2, chloroplastic-like	4.97554e-73	-2.65781	71.5257	28.5191
HL.SW.v1.0.G002215	RETICULATA-RELATED 1, chloroplastic-like	6.13256e-28	-3.56622	17.997	5.32771
HL.SW.v1.0.G002224	peptidyl-tRNA hydrolase ICT1, mitochondrial	2.40891e-20	-2.7583	17.8062	6.82446
HL.SW.v1.0.G002257	probable diphthine methyl ester synthase	7.44398e-05	-2.46136	3.94406	1.67823
HL.SW.v1.0.G002294	Auxin-responsive IAA9	0.00338121	-2.04518	3.22451	1.65418
HL.SW.v1.0.G002423	rop guanine nucleotide exchange factor 14	0.00134147	-2.01665	3.88343	2.02615
HL.SW.v1.0.G002452	Histone H4	0.00170061	-4.6355	1.33306	0.278339
HL.SW.v1.0.G002510	Pentatricopeptide repeat-containing	4.33695e-07	-4.60148	3.00713	0.666323
HL.SW.v1.0.G002527	sphingolipid delta(4)-desaturase DES1-like	0.000122072	-29.4115	0.918458	0
HL.SW.v1.0.G002532	WD repeat-containing VIP3	1.43064e-06	-2.06613	8.36633	4.27628
HL.SW.v1.0.G002573	guanine nucleotide-binding -like NSN1	0.00432416	-2.5636	1.93339	0.77891
HL.SW.v1.0.G002641	40S ribosomal S30	1.30158e-09	-2.59246	8.66177	3.52373
HL.SW.v1.0.G002646	transmembrane ,	2.09894e-07	-5.57543	2.7762	0.499907
HL.SW.v1.0.G002737	ribonuclease III domain-containing RNC1, chloroplastic	0.0037939	-2.29203	2.66171	1.21207
HL.SW.v1.0.G002784	LIM domain-containing WLIM1-like	0.00371926	-3.45998	1.40786	0.407261
HL.SW.v1.0.G002834	cytochrome P450 704C1-like	2.4728e-06	-2.06539	7.98633	4.08303
HL.SW.v1.0.G002852	SNAP25 homologous SNAP30	0.00390628	-18.6081	0.568199	0
HL.SW.v1.0.G002882	---NA---	1.34829e-12	-3.51197	7.75999	2.31949
HL.SW.v1.0.G002971	ATP synthase subunit d, mitochondrial	9.18079e-06	-2.46581	4.95502	2.10932
HL.SW.v1.0.G003018	thioredoxin AAED1, chloroplastic isoform X2	3.27037e-29	-2.79183	25.9174	9.82282
HL.SW.v1.0.G003139	phosphatase and actin regulator 4B-like	8.45736e-51	-2.66441	49.2396	19.5747
HL.SW.v1.0.G003233	hypothetical protein L484_002721	1.47438e-05	-2.72927	4.00692	1.53558
HL.SW.v1.0.G003346	heat shock 70 kDa , mitochondrial	1.63083e-10	-2.3304	11.4227	5.17881
HL.SW.v1.0.G003584	eukaryotic translation initiation factor 3 subunit A-like	9.74958e-06	-2.19616	6.10624	2.92984
HL.SW.v1.0.G003767	uncharacterized aarF domain-containing kinase At4g31390, chloroplastic	0.000129089	-2.17622	4.7578	2.29988
HL.SW.v1.0.G003775	methylmalonate-semialdehyde dehydrogenase [acylating], mitochondrial-like isoform X1	4.22798e-05	-4.54081	2.13962	0.473104
HL.SW.v1.0.G003793		1.87851e-11	-2.49407	11.0232	4.66623
HL.SW.v1.0.G003812	probable calcium-binding CML36	2.69509e-10	-2.12177	13.4514	6.70591
HL.SW.v1.0.G003834	LRR receptor-like serine threonine- kinase GSO1	2.24358e-32	-2.72969	29.8418	11.5711
HL.SW.v1.0.G003847	ARM repeat superfamily	0.0039333	-2.96964	1.74012	0.598647
HL.SW.v1.0.G004007	phytochrome A	0.0026674	-2.40949	2.53386	1.0952
HL.SW.v1.0.G004025	28 kDa ribonucleoprotein, chloroplastic	2.61625e-11	-2.29708	12.6301	5.81356
HL.SW.v1.0.G004118	probable zinc metalloprotease EGY1, chloroplastic	6.17712e-09	-3.46881	5.31145	1.59879
HL.SW.v1.0.G004156	Ras association domain-containing 5	7.32314e-07	-3.06184	4.64698	1.5858
HL.SW.v1.0.G004203	protein gigantea	4.1076e-28	-2.04731	43.8364	22.6888
HL.SW.v1.0.G004208	DEAD-box ATP-dependent RNA helicase 22 isoform X2	5.08531e-05	-2.90365	3.17042	1.13557
HL.SW.v1.0.G004368	heat shock 90-5, chloroplastic	6.76538e-05	-2.84667	3.24972	1.18831
HL.SW.v1.0.G004403	APO 1, chloroplastic	3.63555e-36	-5.05221	17.426	3.63028
HL.SW.v1.0.G004497	transducin WD40 repeat	0.00280673	-2.04828	3.39102	1.73822
HL.SW.v1.0.G004628	5 -3 exonuclease	0.00267059	-2.24341	2.71883	1.26592
HL.SW.v1.0.G004660	NADH-plastoquinone oxidoreductase subunit J (plastid)	0.000312566	-3.67894	1.87666	0.516683
HL.SW.v1.0.G004662	Secologanin synthase	8.0541e-23	-2.39264	25.3947	11.2352
HL.SW.v1.0.G004664	glucosidase 2 subunit beta	0.00223268	-2.36426	2.67357	1.17968
HL.SW.v1.0.G004705	3R-hydroxymyristoyl- dehydratase-hydroxymyristoyl ACP dehydrase isoform 1	7.22892e-36	-3.20006	26.747	8.83998
HL.SW.v1.0.G004782	hypothetical protein L484_011438	4.61077e-06	-2.09717	8.56623	4.31193
HL.SW.v1.0.G004809	nucleolin 2 isoform X2	4.56479e-07	-2.31696	7.26023	3.30335
HL.SW.v1.0.G004821	E3 ubiquitin- ligase RHA1B-like	0.000205513	-2.03525	5.40773	2.8014
HL.SW.v1.0.G004921	proline synthase co-transcribed bacterial homolog	2.75433e-26	-3.04946	20.5871	7.13584
HL.SW.v1.0.G004973	probable adenylate kinase 7, mitochondrial	5.00608e-07	-2.87294	4.98588	1.81851
HL.SW.v1.0.G005010	transcription termination factor MTERF4, chloroplastic	0.000912262	-4.06001	1.48539	0.362264
HL.SW.v1.0.G005013	GTP-binding homolog	2.72289e-36	-2.32497	43.7675	19.9437
HL.SW.v1.0.G005020	60S ribosomal L30	1.72751e-13	-2.27985	292.265	135.929
HL.SW.v1.0.G005069	Tmemb_185A domain-containing zf-C3HC4_3 domain-containing	0.00020855	-2.51353	3.38289	1.40662
HL.SW.v1.0.G005146	ATP-dependent Clp protease proteolytic subunit-related 2, chloroplastic	0.00102012	-23.5752	0.729699	0
HL.SW.v1.0.G005203	uncharacterized protein LOC110426295	1.53791e-05	-2.16556	6.32362	3.07963
HL.SW.v1.0.G005228	60S ribosomal L18-2	2.61204e-26	-2.29933	36.716	16.914
HL.SW.v1.0.G005301	mediator of RNA polymerase II transcription subunit 32	3.42037e-06	-3.30672	3.67318	1.15382
HL.SW.v1.0.G005355	chaperone -like	5.46609e-19	-4.26085	10.0448	2.47432
HL.SW.v1.0.G005494	DUF1446 domain-containing	0.000127174	-2.49292	3.76952	1.58324
HL.SW.v1.0.G005509	Phosphoglucan, water dikinase	2.42295e-10	-2.0434	14.6416	7.58102
HL.SW.v1.0.G005530	Survival of motor neuron-related-splicing factor 30	9.81572e-07	-2.46135	6.03831	2.58202
HL.SW.v1.0.G005561	60S ribosomal L44	1.4509e-52	-3.14558	40.8819	13.7597
HL.SW.v1.0.G005579	2-alkenal reductase (NADP(+)-dependent)-like	6.44307e-23	-2.06632	34.6151	17.7487
HL.SW.v1.0.G005614	uncharacterized protein At4g37920, chloroplastic	0.000107708	-2.46213	3.89851	1.65812
HL.SW.v1.0.G005660	auxin-responsive SAUR36-like	1.06966e-57	-3.86739	142.534	39.0617
HL.SW.v1.0.G005782	glutathione S-transferase-like	3.91096e-05	-2.39032	4.65497	2.04593
HL.SW.v1.0.G005879	violaxanthin de-epoxidase, chloroplastic	0.00293515	-2.9976	1.70876	0.58143
HL.SW.v1.0.G005968	carotenoid cleavage dioxygenase 1	2.84313e-06	-3.56311	3.39255	0.985317
HL.SW.v1.0.G005974	exosome complex component RRP45A-like isoform X1	2.54505e-05	-4.20193	2.34779	0.566524
HL.SW.v1.0.G006187	phytoene synthase 2, chloroplastic-like	6.36773e-17	-2.19642	21.7134	10.4661
HL.SW.v1.0.G006250	heterogeneous nuclear ribonucleo 1	1.47638e-06	-2.00447	8.81257	4.64493
HL.SW.v1.0.G006291	probable polygalacturonase	1.48455e-09	-2.21235	235.378	112.812
HL.SW.v1.0.G006293	photosystem I reaction center subunit N, chloroplastic-like	0	-2.13288	653.408	324.861
HL.SW.v1.0.G006371	alkaline neutral invertase A, mitochondrial	2.11614e-11	-3.75428	6.37603	1.77568
HL.SW.v1.0.G006480	haloacid dehalogenase-like hydrolase domain-containing At2g33255	6.14364e-19	-10.2797	5.9371	0.582123
HL.SW.v1.0.G006489	WD repeat-containing 3	0.000855466	-5.24085	1.21743	0.218533
HL.SW.v1.0.G006706	actin-depolymerizing factor 2	1.49748e-93	-2.50409	99.907	42.2913
HL.SW.v1.0.G006759	RAP domain-containing , chloroplastic	2.82912e-06	-5.67893	2.31182	0.403613
HL.SW.v1.0.G006880	glucan endo-1,3-beta-glucosidase 5-like	0.000247103	-3.43195	2.30755	0.688897
HL.SW.v1.0.G006970	probable peroxygenase 4	1.53328e-28	-3.57721	17.5051	5.16355
HL.SW.v1.0.G006981	probable fructokinase-7	0.000359175	-2.58682	3.19637	1.28959
HL.SW.v1.0.G007266	photosystem I assembly ycf3 (plastid)	1.00329e-28	-4.49945	14.8199	3.46669
HL.SW.v1.0.G007298	hypothetical protein L484_009756	0.0025633	-3.03219	1.78877	0.602712
HL.SW.v1.0.G007405	TATA-box-binding	0.000523262	-2.39567	3.09397	1.34968
HL.SW.v1.0.G007510	divinyl chlorophyllide a 8-vinyl-reductase, chloroplastic	1.84017e-05	-2.47453	4.61154	1.95599
HL.SW.v1.0.G007537	eukaryotic initiation factor 4A-I	5.75978e-08	-2.89979	5.79766	2.09859
HL.SW.v1.0.G007556	H ACA ribonucleo complex subunit 3	2.1787e-07	-2.00749	10.2313	5.38913
HL.SW.v1.0.G007570	chlorophyll a-b binding of LHCII type 1	4.35401e-06	-2.58086	5.04677	2.05365
HL.SW.v1.0.G007571	calvin cycle CP12-3, chloroplastic	1.33951e-13	-2.4038	14.5398	6.39668
HL.SW.v1.0.G007595	hypothetical protein MANES_02G064800	0.000116848	-4.28147	1.87502	0.438532
HL.SW.v1.0.G007616	clathrin interactor EPSIN 1	0.000179287	-2.14899	4.69162	2.2968
HL.SW.v1.0.G007650	serine arginine-rich SC35-like splicing factor SCL28	8.99497e-09	-2.84378	6.60823	2.44175
HL.SW.v1.0.G007818	hypothetical protein L484_009506	4.75465e-23	-3.5877	14.671	4.31179
HL.SW.v1.0.G007825	endoglucanase 4-like	7.91696e-09	-18.1047	2.11357	0.0914372
HL.SW.v1.0.G007840	CBS domain-containing CBSX5-like	7.56233e-07	-4.06609	3.16811	0.800633
HL.SW.v1.0.G007853	twinkle homolog , chloroplastic mitochondrial isoform X1	1.85997e-05	-2.0394	6.80637	3.5231
HL.SW.v1.0.G007991	NADH:ubiquinone oxidoreductase intermediate-associated 30	2.37849e-10	-3.12022	7.06908	2.37904
HL.SW.v1.0.G008159	protein SRG1-like	0.000102309	-7.4383	1.52464	0.187351
HL.SW.v1.0.G008186	cytochrome b561 domain-containing At2g30890-like	0.000153902	-2.91759	2.82436	1.00377
HL.SW.v1.0.G008205	profilin	0	-2.00576	192.447	101.732
HL.SW.v1.0.G008244	alpha carbonic anhydrase 7-like	1.32621e-24	-2.24376	31.3237	14.7831
HL.SW.v1.0.G008257	CAAX amino terminal protease	8.67475e-05	-3.99299	2.35736	0.600028
HL.SW.v1.0.G008266	40S ribosomal S4-3	6.66954e-52	-2.44507	58.1463	25.1981
HL.SW.v1.0.G008281	two-pore potassium channel 3-like	0.000305884	-3.14596	2.45524	0.804524
HL.SW.v1.0.G008321	hypothetical protein L484_027958	6.99206e-07	-2.00139	9.52476	5.02866
HL.SW.v1.0.G008344	bromodomain-containing DDB_G0278469	0.00231576	-3.54426	1.49045	0.421283
HL.SW.v1.0.G008409	bidirectional sugar transporter SWEET4	0.000336737	-2.61809	3.01069	1.19823
HL.SW.v1.0.G008440	translationally-controlled tumor homolog	0	-3.19229	2351.87	781.362
HL.SW.v1.0.G008450	1,4-alpha-glucan-branching enzyme 2-2, chloroplastic amyloplastic	1.03113e-09	-3.26757	6.18108	1.9825
HL.SW.v1.0.G008570	serine threonine- kinase BLUS1-like isoform X1	0.00315624	-2.23273	2.79299	1.30793
HL.SW.v1.0.G008665	kDa vesicle transport	1.3274e-07	-2.15349	8.93807	4.38224
HL.SW.v1.0.G008731	glyceraldehyde-3-phosphate dehydrogenase B, chloroplastic	9.49168e-96	-2.31335	112.85	51.7127
HL.SW.v1.0.G008759	stem-specific TSJT1	4.07235e-83	-2.29891	101.814	46.9476
HL.SW.v1.0.G008908	UPF0548 At2g17695	3.28433e-11	-7.35673	4.00035	0.546593
HL.SW.v1.0.G008910	thiol-disulfide oxidoreductase LTO1	2.12169e-12	-2.67455	10.7836	4.25533
HL.SW.v1.0.G008963	argonaute 10	0.000234464	-2.90863	2.71554	0.96762
HL.SW.v1.0.G009041	Spermine synthase	2.79531e-05	-2.31989	5.12683	2.32457
HL.SW.v1.0.G009056	probable E3 ubiquitin- ligase RHY1A	1.24129e-06	-2.42689	6.32043	2.74099
HL.SW.v1.0.G009143	DNA-binding family	1.90699e-46	-2.00308	77.6311	41.0825
HL.SW.v1.0.G009304	allene oxide cyclase 3, chloroplastic-like	1.07949e-05	-2.54409	4.82264	1.9893
HL.SW.v1.0.G009373	hypothetical protein Ccrd_004022	3.30568e-05	-3.5132	2.78229	0.81563
HL.SW.v1.0.G009395	H ACA ribonucleo complex subunit 2	3.39483e-05	-2.88458	3.59635	1.30059
HL.SW.v1.0.G009427	copper-transporting ATPase PAA1, chloroplastic-like isoform X2	1.9526e-05	-2.33372	4.9799	2.24389
HL.SW.v1.0.G009433	RNA-binding S4 domain-containing	0.00105659	-2.13369	3.58344	1.76245
HL.SW.v1.0.G009452	60S ribosomal L22-2	7.82862e-82	-4.07659	72.1187	18.7381
HL.SW.v1.0.G009464	cryptochrome-1	1.5045e-30	-2.3007	37.3709	17.2074
HL.SW.v1.0.G009543	eukaryotic translation initiation factor	1.62179e-115	-2.76718	103.313	39.5713
HL.SW.v1.0.G009567	20 kDa chaperonin, chloroplastic-like	6.12635e-64	-2.11295	95.6263	47.9779
HL.SW.v1.0.G009718	phosphoglucan phosphatase DSP4, amyloplastic	3.42103e-52	-2.01354	86.4458	45.512
HL.SW.v1.0.G009723	ATP-dependent protease La domain-containing isoform 1	0.00108859	-2.96422	2.30446	0.801496
HL.SW.v1.0.G009776	mediator of RNA polymerase II transcription subunit 17	0.00380182	-2.37433	2.25757	0.98837
HL.SW.v1.0.G009822	dnaJ homolog subfamily B member 6	5.52322e-27	-2.21505	35.3207	16.8937
HL.SW.v1.0.G009873	UMP CMP kinase	5.3545e-14	-2.27449	16.488	7.66937
HL.SW.v1.0.G009917	pentatricopeptide repeat-containing At5g46580, chloroplastic	9.70121e-32	-3.02533	25.3725	8.87112
HL.SW.v1.0.G009932	actin, partial	9.03354e-17	-114.507	3.66098	0
HL.SW.v1.0.G009933	transcription factor bHLH130-like	2.65018e-05	-2.02121	6.54211	3.41441
HL.SW.v1.0.G009939	G3BP-like protein	4.52975e-12	-3.06626	8.72581	2.9949
HL.SW.v1.0.G009947	DNA-binding protein SMUBP-2	3.82869e-25	-2.32359	29.6571	13.5155
HL.SW.v1.0.G009979	lipase YDR444W isoform X1	0.0002643	-2.66494	2.92071	1.14063
HL.SW.v1.0.G009983	nascent polypeptide-associated complex subunit alpha 2	4.1339e-12	-2.70545	10.4787	4.08568
HL.SW.v1.0.G010003	Universal stress A-like protein	0	-3.08565	339.284	116.586
HL.SW.v1.0.G010031	tricin synthase 1-like	0.000912262	-4.61065	1.50232	0.31873
HL.SW.v1.0.G010127	pentatricopeptide repeat-containing At5g50280, chloroplastic	2.58687e-07	-2.60257	6.1815	2.49792
HL.SW.v1.0.G010171	GTP-binding At3g49725, chloroplastic	4.19371e-05	-4.20145	2.29098	0.551947
HL.SW.v1.0.G010194	zinc finger VAR3, chloroplastic	0.00210247	-3.63684	1.6446	0.454579
HL.SW.v1.0.G010232	ATP synthase subunit b , chloroplastic	2.53702e-36	-5.02429	17.6502	3.69868
HL.SW.v1.0.G010321	probable galactinol--sucrose galactosyltransferase 1	3.36613e-12	-3.22533	8.17731	2.66473
HL.SW.v1.0.G010369	alpha-glucan phosphorylase, H isozyme	2.07946e-11	-2.06776	16.0172	8.19782
HL.SW.v1.0.G010410	general transcription factor IIE subunit 2-like	4.86994e-14	-2.17124	18.0639	8.80403
HL.SW.v1.0.G010420	calcineurin B 1	0.000880818	-2.16082	3.70085	1.79828
HL.SW.v1.0.G010424	MO25 At5g47540	8.97041e-15	-2.83442	11.9906	4.46305
HL.SW.v1.0.G010498	small heat shock , chloroplastic-like	0	-9.20851	450.986	51.9071
HL.SW.v1.0.G010517	transcription factor PRE6	1.63627e-06	-5.61594	2.43082	0.430543
HL.SW.v1.0.G010530	serine arginine-rich SC35-like splicing factor SCL30	8.9101e-08	-2.10715	9.57226	4.80106
HL.SW.v1.0.G010632	cytochrome P450 71A26-like	7.85576e-05	-2.28123	4.73015	2.17987
HL.SW.v1.0.G010650	cytochrome P450 84A1	4.70158e-17	-2.9742	13.165	4.67147
HL.SW.v1.0.G010665	BAHD acyltransferase DCR	1.39138e-05	-2.24806	5.84676	2.73926
HL.SW.v1.0.G010703	trichome birefringence-like 31	1.47917e-07	-2.04305	10.0459	5.19588
HL.SW.v1.0.G010720	phosphoenolpyruvate carboxylase kinase 1-like	4.85734e-36	-2.88595	30.822	11.3008
HL.SW.v1.0.G010764	presequence protease 1, chloroplastic mitochondrial-like	5.19917e-12	-2.39543	12.4692	5.50006
HL.SW.v1.0.G010836	PREDICTED: uncharacterized protein LOC107425994	1.98536e-41	-4.63829	21.3219	4.84806
HL.SW.v1.0.G010905	Post-illumination chlorophyll fluorescence increase isoform 1	9.92096e-82	-2.4017	95.4284	42.1161
HL.SW.v1.0.G010919	COMPASS-like H3K4 histone methylase component WDR5B	4.19371e-05	-4.12276	2.27747	0.559767
HL.SW.v1.0.G010967	calcium uniporter 2, mitochondrial	0.000375757	-2.23936	3.98469	1.86876
HL.SW.v1.0.G010990	NAD_binding_10 domain-containing , partial	7.84395e-34	-2.61838	33.5054	13.5493
HL.SW.v1.0.G010991	Peptidyl-prolyl cis-trans isomerase FKBP12	2.22045e-15	-2.48829	219.299	93.4525
HL.SW.v1.0.G010995	mitogen-activated kinase 9	3.98115e-06	-2.17801	6.95516	3.36794
HL.SW.v1.0.G011075	Aldehyde dehydrogenase family 3 member H1	2.42457e-06	-2.19557	7.15392	3.43781
HL.SW.v1.0.G011102	RNA polymerase sigma factor sigD, chloroplastic	8.10451e-06	-2.58695	4.52992	1.83587
HL.SW.v1.0.G011103	uncharacterized protein LOC110654593 isoform X2	6.79987e-36	-2.46435	39.0388	16.779
HL.SW.v1.0.G011231	octicosapeptide Phox Bem1p domain-containing family	6.41701e-07	-2.25889	7.38524	3.44866
HL.SW.v1.0.G011256	R3H domain-containing protein 1	8.4762e-15	-2.25127	17.9484	8.43546
HL.SW.v1.0.G011271	peptide methionine sulfoxide reductase B1, chloroplastic	1.05169e-50	-4.1176	104.245	26.8229
HL.SW.v1.0.G011284	pheophytinase, chloroplastic	0.00182982	-2.02237	3.8125	1.98172
HL.SW.v1.0.G011290	phosphomannomutase phosphoglucomutase	1.39153e-16	-5.62872	6.95356	1.28235
HL.SW.v1.0.G011320	HVA22 e isoform X2	5.6773e-10	-7.21765	3.32118	0.458729
HL.SW.v1.0.G011367	histone deacetylase complex subunit SAP18	1.85638e-41	-3.88129	25.3329	6.89588
HL.SW.v1.0.G011368	PGR5 1A, chloroplastic	5.88862e-13	-2.47121	185.938	79.7754
HL.SW.v1.0.G011502	probable Xaa-Pro aminopeptidase P	1.18612e-13	-3.33418	9.01186	2.8426
HL.SW.v1.0.G011517	pto-interacting 1	4.47369e-10	-2.29241	11.01	5.07321
HL.SW.v1.0.G011571	Lactoylglutathione lyase glyoxalase I family	2.55413e-15	-2.22183	19.0186	9.05914
HL.SW.v1.0.G011866	cellulose synthase G3	1.94172e-06	-7.05743	2.08157	0.283445
HL.SW.v1.0.G011905	omega-3 fatty acid desaturase, chloroplastic	4.46823e-26	-2.75759	23.3558	8.95893
HL.SW.v1.0.G011925	RAE1	0.00143095	-3.49919	1.55878	0.447859
HL.SW.v1.0.G012035	40S ribosomal S19-3	2.28511e-08	-2.13232	10.4726	5.19058
HL.SW.v1.0.G012053	Cysteine-rich receptor kinase 3	0.00102012	-23.5112	0.727273	0
HL.SW.v1.0.G012077	C2 domain-containing At1g53590 isoform X1	0.000107651	-2.50249	3.89332	1.62963
HL.SW.v1.0.G012117	probable phospholipid hydroperoxide glutathione peroxidase	7.21458e-09	-3.0687	6.12203	2.09222
HL.SW.v1.0.G012137	Cathepsin B	1.19438e-118	-10.1481	36.4835	3.77982
HL.SW.v1.0.G012218	hypothetical protein L484_015703	1.70369e-05	-2.78471	3.87912	1.45518
HL.SW.v1.0.G012253	carboxyl-terminal-processing peptidase 3, chloroplastic	2.71947e-05	-3.25736	3.05188	0.969844
HL.SW.v1.0.G012418	ubiquinol oxidase, mitochondrial	3.46407e-19	-6.31471	7.68911	1.26365
HL.SW.v1.0.G012454	E3 ubiquitin- ligase XBAT35 isoform X1	3.13428e-05	-2.48509	4.44541	1.87714
HL.SW.v1.0.G012536	E3 ubiquitin- ligase RNF181-like	0.00155527	-2.26436	3.12931	1.44658
HL.SW.v1.0.G012548	mediator of RNA polymerase II transcription subunit 15	0.00432416	-2.67052	1.9674	0.760485
HL.SW.v1.0.G012663	cytochrome P450 71A1-like	2.43441e-05	-4.60351	2.05863	0.447361
HL.SW.v1.0.G012677	Mitochondrial import inner membrane translocase subunit Tim8	3.94643e-05	-2.28051	4.8616	2.24256
HL.SW.v1.0.G012712	A_thal_3526 domain-containing	1.94447e-10	-2.02801	15.015	7.83378
HL.SW.v1.0.G012717	NADH dehydrogenase subunit 4 (chloroplast)	0.00109016	-2.38421	2.97207	1.30286
HL.SW.v1.0.G012803	2-isopropylmalate synthase 2, chloroplastic-like	5.26258e-07	-2.20096	7.94236	3.80811
HL.SW.v1.0.G012818	glycine-rich RNA-binding GRP1A-like	1.6563e-20	-2.09307	29.6711	15.0175
HL.SW.v1.0.G012843	peptide methionine sulfoxide reductase B5-like	7.3081e-47	-2.18239	65.4626	31.7987
HL.SW.v1.0.G012988	pseudouridine-5 -monophosphatase	1.47175e-07	-20.2789	1.84154	0.0636146
HL.SW.v1.0.G013078	Glycerol-3-phosphate acyltransferase 3	1.74698e-33	-2.13438	47.9627	23.8157
HL.SW.v1.0.G013119	D-amino-acid transaminase, chloroplastic-like	0.000617426	-2.45007	2.97624	1.26835
HL.SW.v1.0.G013129	ribosome biogenesis BRX1-like	6.6191e-05	-4.99548	1.84121	0.363585
HL.SW.v1.0.G013167	phosphoserine phosphatase, chloroplastic	1.19207e-07	-3.08639	4.99334	1.69243
HL.SW.v1.0.G013181	Damaged dna-binding 2, isoform 1	2.20342e-09	-2.04443	13.3311	6.89637
HL.SW.v1.0.G013186	auxin response factor 4 isoform X1	0.00126009	-3.01001	2.16923	0.741539
HL.SW.v1.0.G013376	CTP synthase	0.00307267	-2.20091	2.99553	1.4245
HL.SW.v1.0.G013384	nitric oxide synthase 1	2.14507e-29	-2.77274	26.2887	10.0335
HL.SW.v1.0.G013407	two-component response regulator-like APRR7	2.79008e-07	-2.0957	9.07876	4.57596
HL.SW.v1.0.G013436	probable wrky transcription factor 4	0.00427422	-2.11748	2.92619	1.4473
HL.SW.v1.0.G013451	pentatricopeptide repeat-containing At3g08820	2.54581e-05	-2.55875	4.347	1.78017
HL.SW.v1.0.G013453	aspartyl protease family At5g10770-like	0.00105791	-2.10993	3.53803	1.76061
HL.SW.v1.0.G013492	Ankyrin repeat-containing	0.00183108	-8.07762	0.821268	0.0779622
HL.SW.v1.0.G013561	NHL repeat-containing 2	3.34241e-15	-2.91522	11.9846	4.33723
HL.SW.v1.0.G013577	serine arginine-rich splicing factor RSZ21 isoform X1	3.2044e-06	-2.62721	4.77766	1.90737
HL.SW.v1.0.G013625	vacuolar iron transporter 1-like	5.49091e-07	-2.51679	6.02686	2.51917
HL.SW.v1.0.G013627	DEAD-box ATP-dependent RNA helicase 47, mitochondrial	3.59536e-13	-5.18669	5.86465	1.17104
HL.SW.v1.0.G013636	uncharacterized RNA-binding	1.25513e-37	-3.15908	28.7897	9.6418
HL.SW.v1.0.G013734	dynein light chain 1, cytoplasmic-like	1.43763e-07	-2.10295	9.41574	4.72988
HL.SW.v1.0.G013739	Late embryogenesis abundant , LEA-14	2.69989e-05	-2.19445	5.69543	2.73326
HL.SW.v1.0.G013802	glutamic acid-rich	0.00129749	-2.20421	3.22609	1.53306
HL.SW.v1.0.G013936	thiamine thiazole synthase, chloroplastic-like	7.83729e-12	-2.04423	549.137	284.857
HL.SW.v1.0.G013941	calcium-binding EF hand family	1.06346e-11	-2.00428	17.6879	9.34181
HL.SW.v1.0.G014018	probable 18S rRNA (guanine-N(7))-methyltransferase	0.00119329	-3.48842	1.79845	0.522223
HL.SW.v1.0.G014188	H ACA ribonucleo complex subunit 4	6.02861e-08	-4.45131	3.49467	0.806092
HL.SW.v1.0.G014196	mRNA cap guanine-N7 methyltransferase 2	0.00119329	-3.36257	1.84438	0.557652
HL.SW.v1.0.G014243	hypothetical protein L484_010964	5.33996e-05	-2.49353	4.20737	1.76906
HL.SW.v1.0.G014302	superoxide dismutase [Cu-Zn] 2	2.07927e-06	-2.37513	6.12078	2.71262
HL.SW.v1.0.G014341	ribosomal RNA-processing 14-C-like	1.45623e-11	-2.82507	9.32038	3.47525
HL.SW.v1.0.G014359	60S ribosomal L34	0	-3.68679	327.538	94.1997
HL.SW.v1.0.G014472	serine threonine- kinase STN7, chloroplastic	1.1127e-31	-2.35029	37.5749	16.9328
HL.SW.v1.0.G014497	Ribonuclease J	2.35265e-11	-4.10755	5.86628	1.48853
HL.SW.v1.0.G014524	methyltransferase 6	3.38021e-09	-2.75178	7.56043	2.89184
HL.SW.v1.0.G014622	EMBRYO SAC DEVELOPMENT ARREST 3, chloroplastic	1.51179e-46	-3.28607	33.7835	10.8789
HL.SW.v1.0.G014677	integral membrane	1.01051e-26	-2.10072	38.9671	19.6534
HL.SW.v1.0.G014686	non-functional pseudokinase ZED1-like	1.79864e-08	-2.5345	7.65274	3.18228
HL.SW.v1.0.G014693	Inorganic pyrophosphatase 3	0.000590834	-2.0979	4.17163	2.09077
HL.SW.v1.0.G014708	monodehydroascorbate reductase 5, mitochondrial	4.1926e-10	-2.01888	14.7128	7.71108
HL.SW.v1.0.G014751	linoleate 13S-lipoxygenase 2-1, chloroplastic-like	6.55553e-53	-2.41461	60.6551	26.6203
HL.SW.v1.0.G014782	PREDICTED: uncharacterized protein LOC103324333 isoform X1	7.73385e-05	-2.92397	3.09447	1.10005
HL.SW.v1.0.G014863	CHAPERONE-LIKE PROTEIN OF POR1, chloroplastic	7.27238e-45	-2.21785	60.8499	29.0783
HL.SW.v1.0.G014917	acyl-activating enzyme 19	0.000535615	-2.99866	2.29633	0.789268
HL.SW.v1.0.G014934	probable galactinol--sucrose galactosyltransferase 2	2.87961e-10	-2.04901	14.5588	7.51756
HL.SW.v1.0.G014941	HMG1 2-like protein	5.60397e-25	-2.62923	23.8295	9.59022
HL.SW.v1.0.G014977	COBW domain-containing 1-like	6.70281e-27	-2.17261	36.467	17.7809
HL.SW.v1.0.G014988	BIG GRAIN 1-like A	1.61282e-12	-3.62533	7.32007	2.11669
HL.SW.v1.0.G014995	Outer envelope 61	1.6747e-08	-3.00251	5.94691	2.07727
HL.SW.v1.0.G015030	IAA-amino acid hydrolase ILR1-like 4	3.91791e-07	-3.22919	4.45811	1.44026
HL.SW.v1.0.G015182	REVEILLE 6 isoform X1	2.51157e-13	-3.00885	9.95093	3.4845
HL.SW.v1.0.G015192	glutathione S-transferase	0	-5.34188	1011.67	200.807
HL.SW.v1.0.G015246	bZIP transcription factor 11-like	5.42884e-42	-9.00598	17.537	2.03617
HL.SW.v1.0.G015284	O-acyltransferase WSD1	6.97283e-36	-2.24358	46.4544	21.9404
HL.SW.v1.0.G015311	interaptin-like isoform X1	1.24855e-07	-2.1379	9.3623	4.62679
HL.SW.v1.0.G015330	thioredoxin F-type, chloroplastic-like	0	-3.80232	326.662	91.1501
HL.SW.v1.0.G015397	Dipeptide transport ATP-binding dppF	4.08374e-12	-2.03229	17.5675	9.15041
HL.SW.v1.0.G015464	cytochrome P450 78A3-like	1.54273e-11	-2.06731	16.1098	8.24752
HL.SW.v1.0.G015613	hydroquinone glucosyltransferase-like	7.08926e-05	-2.07233	5.48376	2.78979
HL.SW.v1.0.G015646	protein root primordium defective 1	6.97957e-17	-3.98257	9.35234	2.46463
HL.SW.v1.0.G015733	protein plastid movement impaired 2 isoform x3	0.000453244	-2.31581	3.62457	1.64031
HL.SW.v1.0.G015742	protein iq-domain 1	0.00129732	-2.19401	3.23453	1.54477
HL.SW.v1.0.G015807	ribulose bisphosphate carboxylase oxygenase activase, chloroplastic	0.0037939	-2.29559	2.67665	1.21704
HL.SW.v1.0.G015917	transketolase, chloroplastic	1.96496e-99	-3.1368	79.7036	26.9244
HL.SW.v1.0.G015918	Prefoldin subunit 1	9.32908e-20	-2.25655	24.5492	11.5154
HL.SW.v1.0.G015962	PREDICTED: uncharacterized protein LOC104879889 isoform X1	1.70726e-05	-2.72939	3.89252	1.49055
HL.SW.v1.0.G015977	60S acidic ribosomal P2A-like	4.82421e-22	-2.18424	29.1298	14.1243
HL.SW.v1.0.G016065	multiple organellar RNA editing factor 8, chloroplastic mitochondrial	6.07817e-28	-2.16601	38.2954	18.7304
HL.SW.v1.0.G016165	MLP 28 protein	1.04624e-213	-6.8612	65.9064	10.1566
HL.SW.v1.0.G016190	Calmodulin 1	9.21219e-10	-2.44797	9.38805	4.04769
HL.SW.v1.0.G016321	photosynthetic NDH subunit of subcomplex B 3, chloroplastic	1.38973e-16	-2.29149	20.1551	9.30858
HL.SW.v1.0.G016327	transcription factor MYB51-like isoform X1	1.42615e-05	-2.10529	6.70638	3.36006
HL.SW.v1.0.G016337	small nuclear ribonucleo Sm D1	4.0521e-11	-2.36485	11.6616	5.20951
HL.SW.v1.0.G016348	pentatricopeptide repeat-containing At4g18975, chloroplastic	3.67324e-08	-11.404	2.16649	0.170377
HL.SW.v1.0.G016349	Tetratricopeptide repeat-like superfamily	7.43989e-16	-2.17558	20.7103	10.0784
HL.SW.v1.0.G016402	DETOXIFICATION 29	0.000376049	-2.22101	3.93008	1.85728
HL.SW.v1.0.G016412	hsp70 nucleotide exchange factor fes1-like	0.000518808	-10.3302	0.971603	0.068992
HL.SW.v1.0.G016423	PREDICTED: uncharacterized protein LOC101306458	8.90405e-40	-2.90445	33.7539	12.302
HL.SW.v1.0.G016496	Ribosome maturation factor rimM	9.54934e-08	-3.82602	4.12178	1.11668
HL.SW.v1.0.G016518	DNA polymerase delta subunit 3	0.00176929	-2.53077	2.40617	0.987325
HL.SW.v1.0.G016525	NEP1-interacting -like 1	0.00183009	-2.01773	3.85444	2.00794
HL.SW.v1.0.G016657	staphylococcal nuclease domain-containing 1-like	8.20129e-08	-2.55178	6.86172	2.83052
HL.SW.v1.0.G016680	sucrose transport SUC4-like	0.00212654	-2.1867	3.26272	1.56444
HL.SW.v1.0.G016858	PREDICTED: uncharacterized protein LOC103940956	9.80787e-11	-2.26375	12.4252	5.80126
HL.SW.v1.0.G016949	40S ribosomal S9-2	2.00706e-88	-2.66785	107.343	42.644
HL.SW.v1.0.G016951	40S ribosomal S9-1	1.82251e-32	-2.48275	80.7583	34.482
HL.SW.v1.0.G016957	ATP-dependent Clp protease proteolytic subunit-related 3, chloroplastic	3.42758e-37	-2.84264	32.4099	12.068
HL.SW.v1.0.G016974	sufE 1, chloroplastic mitochondrial	1.77191e-07	-6.11141	2.65784	0.432722
HL.SW.v1.0.G017047	NADH dehydrogenase [ubiquinone] iron-sulfur 8, mitochondrial	6.51457e-23	-2.10973	32.7923	16.4674
HL.SW.v1.0.G017067	25S rRNA (cytosine-C(5))-methyltransferase nop2	2.45941e-06	-2.35898	5.94977	2.65555
HL.SW.v1.0.G017089	NAP1 isoform X1	0.00202418	-21.7378	0.669664	0
HL.SW.v1.0.G017154	thioredoxin CDSP32, chloroplastic	0	-2.36532	186.125	83.4338
HL.SW.v1.0.G017194	copper transporter	0.00105517	-2.00672	4.22405	2.21451
HL.SW.v1.0.G017204	glutamate receptor -like	3.67266e-11	-2.78553	9.05995	3.42713
HL.SW.v1.0.G017226	thioredoxin H-type-like	0	-2.86672	287.178	106.226
HL.SW.v1.0.G017319	hypothetical protein L484_002910	2.84935e-17	-2.94826	13.7432	4.92074
HL.SW.v1.0.G017389	pectinesterase-like	1.903e-55	-5.58943	158.876	30.1151
HL.SW.v1.0.G017409	catalase isozyme 1	4.12804e-34	-6.21192	14.2552	2.40557
HL.SW.v1.0.G017451	peptidyl-prolyl cis-trans isomerase CYP19-3	4.78834e-07	-3.28636	4.21939	1.33814
HL.SW.v1.0.G017538	NADH dehydrogenase [ubiquinone] iron-sulfur 6, mitochondrial	2.11352e-05	-2.1197	6.21335	3.09042
HL.SW.v1.0.G017778	transcription factor MYB1R1	0.00126718	-2.16503	3.45394	1.67342
HL.SW.v1.0.G017787	regulator of nonsense transcripts UPF2	1.66939e-12	-2.39828	13.1963	5.81511
HL.SW.v1.0.G017897	Disease resistance	4.58889e-15	-4.94911	6.98998	1.47048
HL.SW.v1.0.G017923	hypothetical protein L484_026364	0.000226902	-2.78067	3.06634	1.14713
HL.SW.v1.0.G017977	Patatin-like phospholipase domain-containing 2	0.00212412	-2.13943	3.25248	1.59356
HL.SW.v1.0.G018020	importin subunit alpha-2-like	6.78074e-09	-2.12506	11.3686	5.65448
HL.SW.v1.0.G018024	Ubiquitin carboxyl-terminal hydrolase 10	0.00369017	-2.19068	2.82476	1.34883
HL.SW.v1.0.G018042	DUF3741 domain-containing DUF4378 domain-containing	0.000898111	-2.38132	2.89579	1.2699
HL.SW.v1.0.G018091	metal-dependent phosphohydrolase	1.65313e-38	-81.2968	8.65079	0.0790909
HL.SW.v1.0.G018235	flavonol synthase flavanone 3-hydroxylase-like	0.00101559	-4.73623	1.36833	0.279791
HL.SW.v1.0.G018238	phosphate transporter PHO1 homolog 1	4.22673e-11	-6.27678	4.07411	0.659399
HL.SW.v1.0.G018302	jacalin-related lectin 3-like	3.1216e-06	-4.88553	2.45397	0.505443
HL.SW.v1.0.G018389	metallothionein type 3	0	-9.1283	27866.2	3237.43
HL.SW.v1.0.G018571	TIC 20-v, chloroplastic	7.00267e-34	-2.66579	32.3976	12.8676
HL.SW.v1.0.G018574	transcription factor EGL1-like	0.000729957	-2.47211	2.86485	1.20829
HL.SW.v1.0.G018590	B3 domain-containing transcription factor VRN1-like	2.61455e-05	-2.1187	5.88745	2.92892
HL.SW.v1.0.G018595	sporulation RMD1	2.53987e-06	-2.88378	4.44065	1.61073
HL.SW.v1.0.G018599	glycerol-3-phosphate dehydrogenase SDP6, mitochondrial-like	0.00444425	-2.13723	2.75323	1.34807
HL.SW.v1.0.G018625	aceous RNase P 2-like	0.00245199	-2.13907	3.33562	1.6357
HL.SW.v1.0.G018648	hypothetical protein PRUPE_3G266100	2.90811e-12	-2.58633	11.3947	4.65271
HL.SW.v1.0.G018652	jmjC domain-containing 4	1.19041e-05	-2.65711	4.51164	1.77936
HL.SW.v1.0.G018706	RPM1-interacting 4 isoform X1	5.30004e-06	-4.81389	2.42725	0.507643
HL.SW.v1.0.G018740	late embryogenesis abundant , group 3	7.87931e-08	-7.11397	2.60898	0.359484
HL.SW.v1.0.G018804	aquaporin SIP1-2-like	0.00444425	-2.13005	2.69498	1.32372
HL.SW.v1.0.G018872	40S ribosomal S16	5.86881e-12	-3.28864	8.01264	2.55969
HL.SW.v1.0.G018934	60S ribosomal L28-2-like	9.7822e-46	-2.59466	46.3085	18.9081
HL.SW.v1.0.G018967	early nodulin-93-like	0.000630607	-2.18461	3.75337	1.80351
HL.SW.v1.0.G019019	subtilisin-like protease	0	-2.06095	135.113	69.5068
HL.SW.v1.0.G019047	adenylate isopentenyltransferase 5, chloroplastic-like	4.00555e-05	-13.3491	1.22685	0.0658519
HL.SW.v1.0.G019059	meiotically up-regulated gene 185	4.12744e-12	-2.44863	12.2134	5.26991
HL.SW.v1.0.G019128	hypothetical chloroplast RF19 (chloroplast)	0.0040774	-3.61083	1.27987	0.351307
HL.SW.v1.0.G019173	hypothetical protein L484_026204	0.0015225	-2.0353	3.98187	2.05749
HL.SW.v1.0.G019200	actin-depolymerizing factor	1.61647e-40	-2.79859	36.3936	13.7669
HL.SW.v1.0.G019253	leukotriene A-4 hydrolase homolog	1.40758e-19	-2.03714	29.9047	15.55
HL.SW.v1.0.G019343	calmodulin 3	3.91107e-05	-2.86251	3.41998	1.2445
HL.SW.v1.0.G019352	probable plastid-lipid-associated 6, chloroplastic	2.44277e-82	-4.08817	38.8936	10.0629
HL.SW.v1.0.G019451	shikimate O-hydroxycinnamoyltransferase	3.67835e-31	-2.01756	50.1411	26.3395
HL.SW.v1.0.G019541	pectinesterase pectinesterase inhibitor 6	9.40116e-21	-3.26356	14.6562	4.73913
HL.SW.v1.0.G019599	dihydroxy-acid dehydratase, chloroplastic	1.92733e-07	-2.93374	5.28934	1.88876
HL.SW.v1.0.G019712	NEOXANTHIN-DEFICIENT 1-like isoform X1	0.0015209	-2.23771	3.33676	1.56268
HL.SW.v1.0.G019728	FAD synthetase 2, chloroplastic	1.50948e-17	-3.50347	11.1951	3.36449
HL.SW.v1.0.G019734	katanin p60 ATPase-containing subunit A-like 2 isoform X1	5.45147e-12	-4.22633	6.07809	1.49946
HL.SW.v1.0.G019755	phosphoglycerate kinase, chloroplastic	5.4313e-59	-2.32998	72.4874	32.9695
HL.SW.v1.0.G020050	ribosomal S1 (mitochondrion)	7.44333e-05	-2.48564	3.97709	1.67569
HL.SW.v1.0.G020212	high mobility group B 1-like	0.00149634	-2.62006	2.56133	1.01559
HL.SW.v1.0.G020223	cytochrome c oxidase assembly factor 5	0.00219434	-2.20737	3.04433	1.44323
HL.SW.v1.0.G020301	NDR1 HIN1-Like 3-like	9.25115e-11	-72.0985	2.29524	0
HL.SW.v1.0.G020336	rrna intron-encoded homing endonuclease	2.96419e-14	-2.67236	12.6834	5.01234
HL.SW.v1.0.G020382	PREDICTED: uncharacterized protein LOC107434437 isoform X1	2.69995e-06	-2.48657	5.47426	2.31396
HL.SW.v1.0.G020569	regulatory NPR3-like	0.00067958	-3.41903	2.01821	0.601541
HL.SW.v1.0.G020624	FRIGIDA 4a	7.45518e-07	-3.32815	4.16094	1.30239
HL.SW.v1.0.G020716	60S ribosomal L27a-3	1.04203e-42	-2.03681	70.7921	36.8351
HL.SW.v1.0.G020722	dynein light chain LC6, flagellar outer arm-like	5.9946e-15	-2.35836	16.6177	7.45272
HL.SW.v1.0.G020878	PREDICTED: uncharacterized protein LOC103437160	0.00131228	-7.75797	1.03534	0.111619
HL.SW.v1.0.G020898	hypothetical protein L484_020980	0.000409568	-2.91139	2.52205	0.895934
HL.SW.v1.0.G020975	casein kinase 1 10	0.000488294	-6.03808	1.29855	0.199463
HL.SW.v1.0.G020991	CDPK-related kinase 3	0.000207612	-2.12736	4.7226	2.33633
HL.SW.v1.0.G020994	Chlorophyll a-b binding 3, chloroplastic	0	-44792.5	1447.05	0
HL.SW.v1.0.G021060	hypothetical protein L484_009641	0.000149649	-2.81665	3.18191	1.17359
HL.SW.v1.0.G021081	4-hydroxy-3-methylbut-2-en-1-yl diphosphate synthase (ferredoxin), chloroplastic	1.79205e-21	-2.04653	32.739	16.9472
HL.SW.v1.0.G021126	wall-associated receptor kinase-like 9	0.00191404	-2.8104	2.08312	0.763711
HL.SW.v1.0.G021130	Flavonoid 3'-hydroxylase	6.17011e-05	-3.75619	2.48991	0.67795
HL.SW.v1.0.G021160	60S ribosomal L10a	7.65215e-59	-2.38205	70.1735	31.2204
HL.SW.v1.0.G021170	transcription termination factor MTEF1, chloroplastic	0.00213948	-2.17666	3.2318	1.55738
HL.SW.v1.0.G021229	probable acyl-activating enzyme 1, peroxisomal	3.41961e-06	-3.31447	3.68818	1.15677
HL.SW.v1.0.G021311	fasciclin-like arabinogalactan 12	0.000821427	-3.47775	1.75967	0.511788
HL.SW.v1.0.G021379	bifunctional purine biosynthesis	1.27105e-06	-2.30453	6.65882	3.04502
HL.SW.v1.0.G021385	chaperone dnaJ	7.02359e-16	-2.60544	15.1264	6.13722
HL.SW.v1.0.G021386	SSUH2 homolog	1.05106e-56	-2.54529	82.2456	34.2572
HL.SW.v1.0.G021417	ras-related RABA6a-like	0.00418096	-6.16239	0.927887	0.130806
HL.SW.v1.0.G021428	HMG-Y-related A-like	1.08057e-05	-2.12842	6.56992	3.25446
HL.SW.v1.0.G021434	xylose isomerase	1.33918e-09	-63.3266	2.01538	0
HL.SW.v1.0.G021435	Transferring glycosyl groups	8.45029e-16	-2.04537	23.7292	12.2861
HL.SW.v1.0.G021463	probable cytokinin riboside 5 -monophosphate phosphoribohydrolase LOGL10	3.20119e-08	-2.13241	10.1678	5.03825
HL.SW.v1.0.G021511	probable indole-3-pyruvate monooxygenase YUCCA10	1.05871e-12	-2.12124	460.442	230.172
HL.SW.v1.0.G021545	DNA-directed RNA polymerases I, II, and III subunit RPABC5	6.16156e-21	-2.33667	24.4003	11.0556
HL.SW.v1.0.G021578	cysteine synthase	0	-2.09791	256.948	129.873
HL.SW.v1.0.G021601	Elongation factor Ts	1.03387e-09	-2.29978	10.8094	4.9655
HL.SW.v1.0.G021828	G-type lectin S-receptor-like serine threonine- kinase LECRK3	0.000535073	-4.12316	1.7115	0.414455
HL.SW.v1.0.G021849	hypothetical protein L484_004572	2.34517e-11	-2.51669	10.7631	4.51514
HL.SW.v1.0.G021898	zinc finger VAR3, chloroplastic-like	6.52858e-09	-3.1929	5.76706	1.89197
HL.SW.v1.0.G021959	Mini-ribonuclease 3	5.47769e-09	-2.10305	11.7019	5.88204
HL.SW.v1.0.G022006	CEN 1	1.30373e-44	-2.98953	36.7115	12.9977
HL.SW.v1.0.G022024	bidirectional sugar transporter SWEET17-like	7.56381e-23	-2.05267	34.9015	18.0146
HL.SW.v1.0.G022038	RNA polymerase alpha subunit (chloroplast)	2.73753e-10	-4.324	5.00223	1.20053
HL.SW.v1.0.G022039	ribosomal S3 (chloroplast)	1.67267e-100	-5.4008	37.1681	7.27032
HL.SW.v1.0.G022062	carboxymethylenebutenolidase homolog	1.46322e-12	-2.13283	16.6592	8.26528
HL.SW.v1.0.G022114	phosphopantothenoylcysteine decarboxylase subunit VHS3	0	-3.11448	232.571	79.1706
HL.SW.v1.0.G022327	probable aquaporin NIP5-1	2.0305e-06	-2.14949	7.23965	3.55376
HL.SW.v1.0.G022395	transferase At1g60990, chloroplastic	9.32401e-06	-2.17497	6.49308	3.14785
HL.SW.v1.0.G022500	Myelin-associated oligodendrocyte basic isoform 1	5.9264e-95	-2.40706	104.905	46.1992
HL.SW.v1.0.G022536	universal stress PHOS32-like	1.71795e-06	-2.29877	7.40989	3.40078
HL.SW.v1.0.G022574	nicalin-1	0.000584406	-2.62798	2.7957	1.10718
HL.SW.v1.0.G022769	2,3-dimethylmalate lyase isoform X1	1.23023e-08	-3.28095	5.46062	1.74128
HL.SW.v1.0.G022904	protein chloroplast import apparatus 2	0.00383845	-2.27129	2.43592	1.11785
HL.SW.v1.0.G022908	dna-directed rna polymerase i subunit rpa2	7.49279e-11	-2.62899	9.51559	3.81813
HL.SW.v1.0.G022956	aspartate carbamoyltransferase, chloroplastic	2.09894e-07	-5.99415	2.80643	0.468145
HL.SW.v1.0.G023105	ras-related RABE1c isoform X1	1.38169e-09	-2.08604	12.7332	6.45403
HL.SW.v1.0.G023115	uncharacterized protein LOC105645131	7.07437e-11	-2.25743	12.4522	5.83155
HL.SW.v1.0.G023213	iron-sulfur assembly , chloroplastic	1.82911e-33	-2.36438	38.9397	17.4457
HL.SW.v1.0.G023248	solute carrier family 25 member 41	0.00176929	-2.48313	2.37011	0.991581
HL.SW.v1.0.G023269	regulatory-associated of TOR 1-like isoform X2	0.00442512	-4.61017	1.01755	0.207184
HL.SW.v1.0.G023280	stress-induced-phospho 1	0.00455151	-2.90435	1.60491	0.563509
HL.SW.v1.0.G023350	K(+) efflux antiporter 2, chloroplastic	1.71762e-10	-3.21821	7.03724	2.29534
HL.SW.v1.0.G023642	hypothetical protein L484_003356	7.65035e-19	-2.29844	22.2521	10.2467
HL.SW.v1.0.G023683	ferredoxin	0	-2.70625	285.84	111.988
HL.SW.v1.0.G023698	EARLY-RESPONSIVE TO DEHYDRATION 7, chloroplastic-like	9.76064e-06	-2.37661	5.32644	2.35725
HL.SW.v1.0.G023786	probable nucleolar 5-2	4.95076e-05	-2.0828	5.7603	2.91478
HL.SW.v1.0.G023805	RRP15-like protein	0.00105647	-2.21543	3.59468	1.70204
HL.SW.v1.0.G023870	plastid DNA-binding , partial	0.00232898	-3.37571	1.48642	0.442202
HL.SW.v1.0.G024132	PREDICTED: uncharacterized protein LOC109001662	0.00293515	-3.11398	1.6614	0.542535
HL.SW.v1.0.G024245	GMP synthase [glutamine-hydrolyzing]	1.34481e-07	-3.49469	4.27091	1.27096
HL.SW.v1.0.G024358	L10-interacting MYB domain-containing -like	9.14421e-06	-3.28362	3.4311	1.08418
HL.SW.v1.0.G024397	PREDICTED: uncharacterized protein LOC107435073	1.8025e-10	-69.8807	2.22561	0
HL.SW.v1.0.G024424	LOB domain-containing 38-like	9.97651e-18	-3.98456	9.86065	2.599
HL.SW.v1.0.G024590	HBS1 isoform X2	1.93022e-05	-5.77137	1.83008	0.307961
HL.SW.v1.0.G024609	probable polyamine oxidase 2	0.0026674	-2.42958	2.51094	1.07586
HL.SW.v1.0.G024687	cofactor assembly of complex c isoform 1	2.70469e-06	-2.51938	5.4808	2.28662
HL.SW.v1.0.G024740	cinnamoyl- reductase 1-like	1.09574e-31	-3.3352	22.3701	7.09017
HL.SW.v1.0.G024804	hypothetical protein L484_018253	7.6296e-05	-9.54113	1.14193	0.0961134
HL.SW.v1.0.G024831	F-box 7	2.90871e-07	-46.764	1.47876	0
HL.SW.v1.0.G024907	KAT8 regulatory NSL complex subunit 3	0.000940718	-3.14006	2.08972	0.682641
HL.SW.v1.0.G024956	exosome complex component RRP43	1.11054e-18	-7.57662	6.58221	0.891794
HL.SW.v1.0.G024970	40S ribosomal S18	3.94494e-25	-2.66729	23.7314	9.41308
HL.SW.v1.0.G025031	centromere kinetochore zw10 homolog	1.40144e-05	-3.89581	2.80095	0.736793
HL.SW.v1.0.G025033	G patch domain-containing 8	1.24855e-12	-3.00197	9.39061	3.29292
HL.SW.v1.0.G025073	auxin efflux carrier component 8	5.65377e-08	-8.96356	2.46283	0.260912
HL.SW.v1.0.G025140	pentatricopeptide repeat-containing At4g14820	0.0025633	-2.90031	1.78674	0.63095
HL.SW.v1.0.G025156	Potassium sodium hyperpolarization-activated cyclic nucleotide-gated channel 1	0.00122519	-2.1506	3.61691	1.7653
HL.SW.v1.0.G025371	Receptor 12	4.56732e-07	-4.12877	3.37975	0.842708
HL.SW.v1.0.G025437	peptidyl-prolyl cis-trans isomerase NIMA-interacting 4	1.23974e-43	-2.0858	110.934	56.3993
HL.SW.v1.0.G025444	F-box PP2-A13-like	1.86853e-06	-2.75287	5.03221	1.91664
HL.SW.v1.0.G025507	PREDICTED: uncharacterized protein LOC103333685	4.14177e-06	-3.49529	3.43427	1.0179
HL.SW.v1.0.G025552	probable RNA helicase SDE3	1.7017e-05	-3.02981	3.55829	1.22295
HL.SW.v1.0.G025602	40S ribosomal S27-2-like	8.35253e-98	-3.57261	73.0907	21.6759
HL.SW.v1.0.G025693	2-oxoglutarate (2OG) and Fe(II)-dependent oxygenase superfamily isoform 1	0.00434359	-4.31742	1.15442	0.257233
HL.SW.v1.0.G025723	hypothetical protein L484_002283	0.000470779	-2.07702	4.45987	2.25923
HL.SW.v1.0.G025849	protochlorophyllide-dependent translocon component 52, chloroplastic	2.10281e-13	-3.30425	10.4229	3.31635
HL.SW.v1.0.G025863	Potassium transporter 2	0.000155239	-2.42106	3.80824	1.64786
HL.SW.v1.0.G025877	plastid division PDV2-like	0.000526703	-2.15633	3.90272	1.90146
HL.SW.v1.0.G025949	60S acidic ribosomal P2B-like	1.46198e-09	-2.32698	10.3072	4.67876
HL.SW.v1.0.G025967	PREDICTED: uncharacterized protein LOC107428290	5.10263e-13	-2.08407	27.0445	13.7436
HL.SW.v1.0.G026089	F-box At1g67340	0.00338598	-2.05578	3.21426	1.64028
HL.SW.v1.0.G026183	nudix hydrolase 15, mitochondrial	0.000976573	-13.9819	0.694426	0.0209015
HL.SW.v1.0.G026254	Peptidyl-prolyl cis-trans isomerase FKBP20-1	6.55147e-08	-2.91911	5.67901	2.04071
HL.SW.v1.0.G026286	hypothetical protein POPTR_0008s11310g	5.43948e-168	-7.66643	70.4525	9.71746
HL.SW.v1.0.G026294	BTB POZ and TAZ domain-containing 1-like	7.56195e-44	-2.86754	37.8564	13.9773
HL.SW.v1.0.G026372	mediator of RNA polymerase II transcription subunit 6	0.00288736	-2.74224	2.04374	0.768552
HL.SW.v1.0.G026378	single-stranded DNA-binding , mitochondrial-like	0.000305884	-3.11195	2.4808	0.822204
HL.SW.v1.0.G026395	(R)-mandelonitrile lyase 1-like	1.80312e-08	-5.6057	3.40358	0.615991
HL.SW.v1.0.G026432	heavy metal-associated isoprenylated plant 36-like	1.09114e-06	-2.71254	5.19418	2.00978
HL.SW.v1.0.G026450	phosphomethylethanolamine N-methyltransferase	2.10054e-82	-16.8865	20.6191	1.26283
HL.SW.v1.0.G026490	eukaryotic translation initiation factor 6-2	0.00012114	-2.53638	3.57824	1.47542
HL.SW.v1.0.G026562	YLS3	1.40555e-37	-2.1014	58.4813	29.4974
HL.SW.v1.0.G026573	50S ribosomal L18	3.16771e-06	-2.50839	5.33282	2.23381
HL.SW.v1.0.G026592	probable tyrosine- phosphatase At1g05000	2.61855e-07	-2.0711	9.44776	4.81973
HL.SW.v1.0.G026663	hypothetical protein L484_001174	1.37908e-09	-2.05699	13.3995	6.89108
HL.SW.v1.0.G026675	eukaryotic translation initiation factor 3 subunit C-like	6.60903e-05	-2.38691	4.49199	1.97563
HL.SW.v1.0.G026710	polyadenylate-binding 2-like	8.37467e-41	-2.22764	53.8239	25.6062
HL.SW.v1.0.G026722	glyoxylate succinic semialdehyde reductase 2, chloroplastic	6.09841e-25	-2.79693	21.8538	8.26152
HL.SW.v1.0.G026841	uncharacterized membrane -like	1.67094e-09	-2.18674	11.3465	5.48363
HL.SW.v1.0.G026906	60S ribosomal L12	2.93003e-55	-2.00109	95.4726	50.5824
HL.SW.v1.0.G026941	p21-activated kinase-interacting 1-like	2.94096e-05	-2.70644	3.68452	1.42213
HL.SW.v1.0.G026982	hypothetical protein L484_026028	0.000373105	-2.0267	4.81119	2.50054
HL.SW.v1.0.G027112	Fatty acid amide hydrolase	0.000910545	-5.00934	1.37297	0.263412
HL.SW.v1.0.G027125	Lysosomal Pro-X carboxypeptidase	0.000518808	-9.31372	0.992165	0.0824437
HL.SW.v1.0.G027142	F-box LRR-repeat At4g29420	0.00208821	-2.68283	2.25965	0.87188
HL.SW.v1.0.G027158	LOV domain-containing	6.08407e-15	-3.60143	9.24946	2.6988
HL.SW.v1.0.G027248	hypothetical protein L484_021704	1.28004e-06	-2.59497	5.6152	2.27438
HL.SW.v1.0.G027289	cytochrome P450 71D11-like	0.000207528	-2.10385	4.7619	2.38239
HL.SW.v1.0.G027296	PIR isoform X2	0.000182176	-3.78782	2.10213	0.562606
HL.SW.v1.0.G027312	4-alpha-glucanotransferase DPE2	9.12409e-15	-4.41691	7.41937	1.75475
HL.SW.v1.0.G027401	PREDICTED: uncharacterized protein LOC108993701 isoform X1	0.00202579	-2.40396	2.94429	1.27956
HL.SW.v1.0.G027412	24-methylenesterol C-methyltransferase 2	1.36587e-139	-92.2507	30.788	0.320303
HL.SW.v1.0.G027414	probable dolichyl-diphosphooligosaccharide-- glycosyltransferase subunit 3B	1.86389e-06	-2.51214	5.52128	2.30954
HL.SW.v1.0.G027415	nuclear transport factor 2	3.01189e-05	-3.32452	2.95467	0.919048
HL.SW.v1.0.G027455	chaperonin-like 2, chloroplastic	9.72693e-29	-2.79937	25.2268	9.53479
HL.SW.v1.0.G027466	superoxide dismutase [Fe] 3, chloroplastic	0.000881101	-2.13805	3.69882	1.81723
HL.SW.v1.0.G027514	ferritin-3, chloroplastic	0	-5.55329	356.059	67.9671
HL.SW.v1.0.G027573	protein DA1	5.5126e-07	-2.70374	5.51536	2.14218
HL.SW.v1.0.G027705	MLO-like protein 10	0.000644134	-2.06328	4.40939	2.24826
HL.SW.v1.0.G027717	dynamin-related 3A-like	0.000898111	-2.43813	2.89226	1.2373
HL.SW.v1.0.G027762	phosphatase 2C 57	1.70791e-121	-3.45839	57.5767	17.6298
HL.SW.v1.0.G027851	Phospholipase D delta	1.23029e-06	-2.20719	7.46983	3.5704
HL.SW.v1.0.G027898	Serine threonine- phosphatase PP2A-4 catalytic subunit	6.33431e-05	-2.14453	5.25348	2.57952
HL.SW.v1.0.G027960	THO complex subunit 4A-like	1.67885e-21	-2.44898	22.931	9.90959
HL.SW.v1.0.G028077	tRNA (cytosine(34)-C(5))-methyltransferase	1.40705e-13	-7.8385	4.77125	0.615263
HL.SW.v1.0.G028110	probable serine threonine- kinase At4g35230	1.93854e-47	-2.82296	42.1651	15.818
HL.SW.v1.0.G028114	ATP-dependent zinc metalloprotease FTSH, chloroplastic	1.67668e-21	-2.53854	21.4964	8.95979
HL.SW.v1.0.G028149	B-box zinc finger 19-like isoform X2	5.8566e-68	-3.21626	51.4206	16.9314
HL.SW.v1.0.G028217	heavy metal-associated isoprenylated plant 45	3.25759e-12	-5.63949	5.01943	0.916542
HL.SW.v1.0.G028343	1-aminocyclopropane-1-carboxylate oxidase homolog 1-like	1.57713e-27	-2.58726	27.1636	11.1133
HL.SW.v1.0.G028348	glutathione-specific gamma-glutamylcyclotransferase 2	1.01457e-34	-3.21757	25.7752	8.47139
HL.SW.v1.0.G028534	Peptidyl-prolyl cis-trans isomerase FKBP53	0.00193039	-6.73549	0.852791	0.10506
HL.SW.v1.0.G028615	40S ribosomal S25-2	2.07275e-22	-2.39834	24.9299	11.0051
HL.SW.v1.0.G028779	protein eceriferum 26-like	0.000537462	-2.00308	4.51795	2.37433
HL.SW.v1.0.G028816	auxin response factor 1	0.000813138	-2.0689	4.12052	2.09438
HL.SW.v1.0.G028842	NHP2-like protein1	2.57666e-14	-2.45917	14.555	6.25487
HL.SW.v1.0.G028880	glycine-rich RNA-binding RZ1A	7.55275e-06	-2.90737	4.03928	1.45149
HL.SW.v1.0.G028881	MAM33 domain-containing	0.00460151	-2.30477	2.36337	1.06824
HL.SW.v1.0.G028888	uncharacterized protein At2g27730, mitochondrial	3.82373e-05	-2.18625	5.43948	2.62032
HL.SW.v1.0.G028911	alpha-glucan water dikinase, chloroplastic isoform X2	0.000271554	-3.56083	2.17132	0.621892
HL.SW.v1.0.G028937	cytochrome c oxidase subunit 6b-1-like	0.00111488	-2.07084	4.02046	2.04128
HL.SW.v1.0.G028951	heme-binding At3g10130, chloroplastic	1.8316e-28	-3.28583	20.1936	6.49339
HL.SW.v1.0.G028981	DNA-directed RNA polymerases II, IV and V subunit 9A	0.0037939	-2.18884	2.67916	1.27989
HL.SW.v1.0.G028994	uncharacterized oxidoreductase At1g06690, chloroplastic	0.000990634	-2.00257	4.42187	2.32409
HL.SW.v1.0.G029006	plant UBX domain-containing 7 isoform X1	8.45328e-12	-2.08514	16.2181	8.22976
HL.SW.v1.0.G029020	SRC1-like	0	-3.80948	2766.86	770.218
HL.SW.v1.0.G029027	alcohol dehydrogenase 1	0.00259953	-4.70574	1.2167	0.247158
HL.SW.v1.0.G029072	Nuclear transport factor 2 family	1.88927e-41	-3.7032	26.277	7.50074
HL.SW.v1.0.G029104	peroxisomal (S)-2-hydroxy-acid oxidase	7.7002e-11	-2.0654	453.34	232.744
HL.SW.v1.0.G029179	mitogen-activated kinase kinase kinase 3-like	0.000708229	-2.11817	4.00018	1.98491
HL.SW.v1.0.G029198	neutral alkaline invertase 3, chloroplastic-like	1.15773e-12	-2.89601	9.82472	3.57608
HL.SW.v1.0.G029317	lupeol synthase-like	0.00148967	-5.67184	1.19493	0.194951
HL.SW.v1.0.G029318	PREDICTED: uncharacterized protein LOC103432480	1.57039e-26	-21.735	6.93593	0.305606
HL.SW.v1.0.G029436	G-type lectin S-receptor-like serine threonine- kinase At1g11410	0.00223268	-2.4079	2.65833	1.15086
HL.SW.v1.0.G029494	ACT domain-containing ACR10	0	-2.75742	187.606	72.1317
HL.SW.v1.0.G029552	hypothetical protein L484_009389	1.8982e-10	-3.23347	6.87632	2.23133
HL.SW.v1.0.G029578	late embryogenesis abundant At1g64065	6.94512e-07	-2.12807	8.23971	4.0881
HL.SW.v1.0.G029707	beta-galactosidase 9 isoform X2	0.000526547	-2.20046	3.90125	1.86203
HL.SW.v1.0.G030023	transmembrane adipocyte-associated 1-like	9.52782e-19	-2.41133	20.4422	8.96915
HL.SW.v1.0.G030042	tRNA (cytidine(34)-2 -O)-methyltransferase	0.000533537	-4.75666	1.41894	0.289172
HL.SW.v1.0.G030131	zeaxanthin epoxidase, chloroplastic	5.1845e-26	-3.28721	163.001	52.5613
HL.SW.v1.0.G030218	SWIB MDM2 domain protein	0.000523238	-2.44295	3.11099	1.32995
HL.SW.v1.0.G030257	homogentisate phytyltransferase	4.32249e-10	-4.44835	4.66107	1.08427
HL.SW.v1.0.G030326	hypothetical protein L484_010182	0.000179345	-2.136	4.66172	2.29614
HL.SW.v1.0.G030327	PREDICTED: uncharacterized protein LOC107430112 isoform X2	0.00140276	-2.68227	2.34623	0.906058
HL.SW.v1.0.G030461	nuclear transcription factor Y subunit B-3	5.60838e-08	-2.4506	7.68406	3.30542
HL.SW.v1.0.G030468	SH3 domain-containing 1	0.00332698	-3.2644	1.58038	0.489327
HL.SW.v1.0.G030512	N-alpha-acetyltransferase 50	0.00049713	-2.5904	2.94478	1.18468
HL.SW.v1.0.G030583	hypothetical protein L484_023487	3.27115e-09	-2.37396	9.47463	4.21251
HL.SW.v1.0.G030718	nicotianamine synthase	9.13705e-10	-3.53233	5.72487	1.69396
HL.SW.v1.0.G030789	alpha beta-hydrolases superfamily protein	7.02065e-22	-3.67143	13.4591	3.86299
HL.SW.v1.0.G030792	calmodulin-binding transcription activator 3	0.000356473	-2.14527	4.31715	2.1171
HL.SW.v1.0.G030869	Tetratricopeptide repeat-like superfamily , isoform 1	0.000904525	-2.23169	3.50118	1.64578
HL.SW.v1.0.G031105	uncharacterized protein LOC110758707	2.8151e-14	-2.45559	14.5452	6.25977
HL.SW.v1.0.G031123	hypothetical protein L484_018568	0.000767531	-2.28074	3.42529	1.57401
HL.SW.v1.0.G031248	plastid-lipid-associated , chloroplastic-like	1.95829e-43	-3.88156	97.14	26.5115
HL.SW.v1.0.G031378	thiol protease aleurain-like	4.98518e-152	-1812.07	58.5557	0
HL.SW.v1.0.G031538	dol-P-Glc:Glc(2)Man(9) c(2)-PP-Dol alpha-1,2-glucosyltransferase isoform X1	0.00432416	-2.66557	1.95778	0.75692
HL.SW.v1.0.G031633	6,7-dimethyl-8-ribityllumazine synthase	3.17671e-72	-2.74119	68.1516	26.3439
HL.SW.v1.0.G031681	mitochondrial import receptor subunit TOM6 homolog	1.35327e-14	-2.09137	20.6118	10.4325
HL.SW.v1.0.G031794	DAR GTPase 3, chloroplastic	1.17943e-05	-2.27795	5.56691	2.57298
HL.SW.v1.0.G031798	60S ribosomal L10	0	-2.35172	177.631	80.0876
HL.SW.v1.0.G031811	eukaryotic translation initiation factor 5B	2.09894e-07	-5.83955	2.83005	0.48561
HL.SW.v1.0.G031850	nijmegen breakage syndrome 1 isoform X2	0.00064164	-2.26719	3.55803	1.64504
HL.SW.v1.0.G031869	DEAD-box ATP-dependent RNA helicase 14-like	1.01027e-23	-3.13404	17.6306	5.94318
HL.SW.v1.0.G031892	40S ribosomal S15-4	9.87578e-30	-2.18747	40.3253	19.5302
HL.SW.v1.0.G032028	Interferon-induced guanylate-binding 2	0.000522755	-2.5005	3.08821	1.28887
HL.SW.v1.0.G032030	probable sodium metabolite cotransporter BASS3, chloroplastic	1.89521e-34	-2.81094	30.3902	11.4437
HL.SW.v1.0.G032093	Ribosomal S21 family isoform 1	0.00101591	-2.49545	2.56839	1.07083
HL.SW.v1.0.G032175	ras-related RABB1b	6.62096e-05	-2.37015	4.47759	1.98295
HL.SW.v1.0.G032310	probable zinc metalloprotease EGY2, chloroplastic	8.73732e-09	-2.00369	12.7841	6.74988
HL.SW.v1.0.G032391	Peroxidase 17	3.19463e-65	-7.15436	22.8778	3.36164
HL.SW.v1.0.G032423	Serine threonine- kinase	4.03583e-14	-4.32583	7.21472	1.74222
HL.SW.v1.0.G032467	thioredoxin-like 3-1, chloroplastic	9.8346e-39	-2.17209	53.6932	26.196
HL.SW.v1.0.G032473	pescadillo homolog	0.000367488	-2.18986	4.18517	2.00812
HL.SW.v1.0.G032495	mlp-like protein 31	0.00390628	-18.2059	0.555513	0
HL.SW.v1.0.G032595	thioredoxin AAED1, chloroplastic	8.09819e-11	-3.63641	6.28441	1.8081
HL.SW.v1.0.G032680	serine threonine- kinase CTR1-like isoform X1	0.0031854	-2.48997	2.43077	1.01503
HL.SW.v1.0.G032716	Oxoglutarate iron-dependent dioxygenase	0.00401962	-20.1612	0.619929	0
HL.SW.v1.0.G032947	Signal recognition particle 14 kDa	5.34296e-07	-2.09373	8.99214	4.53545
HL.SW.v1.0.G032959	puromycin-sensitive aminopeptidase isoform X2	1.9379e-11	-2.02185	16.8874	8.83971
HL.SW.v1.0.G033040	transcription initiation factor TFIID subunit 8-like	0.000824125	-2.87843	2.1838	0.781876
HL.SW.v1.0.G033041	29 kDa ribonucleo A, chloroplastic-like	1.02189e-37	-2.16504	52.7937	25.8418
HL.SW.v1.0.G033049	nucleolar 16	1.61663e-07	-4.90761	3.22277	0.668894
HL.SW.v1.0.G033078	beta-taxilin isoform X1	0.00338088	-2.05356	3.27442	1.67361
HL.SW.v1.0.G033087	zinc finger CONSTANS-LIKE 14	0.00191404	-2.92394	2.0982	0.738362
HL.SW.v1.0.G033121	2-succinylbenzoate-- ligase, chloroplastic peroxisomal	0.00126364	-2.49714	2.64379	1.10231
HL.SW.v1.0.G033152	ATP-dependent DNA helicase At3g02060, chloroplastic isoform X1	4.69047e-10	-5.58338	3.98727	0.729372
HL.SW.v1.0.G033207	proline dehydrogenase 2, mitochondrial-like	0.00245901	-2.7907	2.17159	0.803215
HL.SW.v1.0.G033249	vacuolar 8	0.000976573	-22.5189	0.695102	0
HL.SW.v1.0.G033360	transcription factor PIF4-like	6.56684e-18	-2.93067	14.147	5.09669
HL.SW.v1.0.G033394	transposase, Ptta En Spm, plant	0.000268559	-2.98047	2.60426	0.904016
HL.SW.v1.0.G033572	potassium channel AKT2 3	0.00108285	-2.25235	3.37113	1.56816
HL.SW.v1.0.G033622	(+)-neomenthol dehydrogenase-like	3.33877e-25	-4.71993	12.5821	2.80026
HL.SW.v1.0.G033704	H ACA ribonucleo complex subunit 1 1	9.0964e-13	-58.1633	2.66853	0.0149986
HL.SW.v1.0.G033749	10 kDa chaperonin-like	4.97848e-11	-2.01334	16.5134	8.67968
HL.SW.v1.0.G033916	polynucleotide 3 -phosphatase ZDP	2.51705e-08	-2.9892	6.46285	2.26911
HL.SW.v1.0.G033934	thioredoxin H2-like	1.07816e-19	-3.25018	13.9035	4.51211
HL.SW.v1.0.G033964	polyadenylate-binding RBP47B -like	0.00315624	-2.27806	2.80118	1.28479
HL.SW.v1.0.G034078	G-type lectin S-receptor-like serine threonine- kinase At4g27290 isoform X1	1.50997e-14	-7.0826	5.32511	0.768127
HL.SW.v1.0.G034107	probable voltage-gated potassium channel subunit beta	2.84084e-20	-3.82547	14.5396	4.00526
HL.SW.v1.0.G034656	pentatricopeptide repeat-containing At5g59200, chloroplastic	0.000518808	-11.414	0.989011	0.0605535
HL.SW.v1.0.G034693	small nuclear ribonucleo Sm D2-like	1.42639e-08	-4.19886	4.11093	1.01221
HL.SW.v1.0.G034704	low-temperature-induced cysteine ase	3.26661e-05	-2.23086	5.4043	2.55026
HL.SW.v1.0.G034803	flagellar radial spoke 5 isoform X1	0	-2.00781	129.735	68.5111
HL.SW.v1.0.G034827	50S ribosomal L17	4.56063e-05	-2.02345	6.146	3.20568
HL.SW.v1.0.G034974	DEAD-box ATP-dependent RNA helicase 31-like	2.74889e-06	-3.14285	3.95113	1.30993
HL.SW.v1.0.G034985	UVR domain-containing DUF525 domain-containing	5.61569e-06	-2.47667	5.31915	2.25722
HL.SW.v1.0.G035012	L-type lectin-domain containing receptor kinase	4.61429e-08	-2.85345	6.02782	2.2179
HL.SW.v1.0.G035025	cold and drought-regulated CORA-like	1.71467e-08	-2.78273	6.65792	2.51516
HL.SW.v1.0.G035174	flowering locus T	1.57793e-11	-2.12437	15.2739	7.60813
HL.SW.v1.0.G035199	amidophosphoribosyltransferase, chloroplastic	0.00176728	-2.11035	3.38578	1.68298
HL.SW.v1.0.G035268	BOLA2-like	4.16904e-26	-2.89838	21.8258	7.963
HL.SW.v1.0.G035344	amino-acid permease BAT1 homolog	0.000824125	-3.06929	2.22366	0.745323
HL.SW.v1.0.G035389	Uncharacterized protein L484_006539	0.00039833	-2.00698	5.09323	2.67458
HL.SW.v1.0.G035478	Tetratricopeptide repeat 1	3.32506e-09	-3.038	6.56483	2.26867
HL.SW.v1.0.G035481	60S ribosomal L19-3-like	5.21051e-17	-2.09546	24.2758	12.2678
HL.SW.v1.0.G035510	RADIALIS-like 1	8.10328e-27	-4.55478	13.8361	3.19399
HL.SW.v1.0.G035536	CCG-binding 1	0.000877344	-2.00601	4.33562	2.27419
HL.SW.v1.0.G035554	mitochondrial import inner membrane translocase subunit TIM23-2-like	2.90871e-07	-47.6893	1.50799	0
HL.SW.v1.0.G035565	NAD(P)H-quinone oxidoreductase subunit U, chloroplastic	1.03746e-20	-3.13882	15.1892	5.11018
HL.SW.v1.0.G035626	ESCRT-related CHMP1B	0.000318637	-2.24347	3.91336	1.83017
HL.SW.v1.0.G035647	hypothetical protein L484_016394	0.000125619	-2.13944	4.90351	2.41237
HL.SW.v1.0.G035667	homolog subfamily A member 3	5.50211e-47	-2.56949	48.9553	20.1857
HL.SW.v1.0.G035673	Histone deacetylase HDT1	3.09081e-40	-3.98443	23.8954	6.33409
HL.SW.v1.0.G035718	50S ribosomal L13-like	1.45652e-07	-3.7126	4.18881	1.1718
HL.SW.v1.0.G035777	40S ribosomal S12-like	2.49679e-14	-2.05328	21.0636	10.8627
HL.SW.v1.0.G035788	Polyketide cyclase -like domain	5.14912e-05	-2.01621	6.25034	3.26952
HL.SW.v1.0.G035818	ankyrin repeat-containing At5g02620-like isoform X1	0.00369017	-2.23313	2.88638	1.35216
HL.SW.v1.0.G035922	zinc finger 593	2.14844e-58	-6.17504	85.8905	14.722
HL.SW.v1.0.G035960	PREDICTED: uncharacterized protein LOC107408768	0.000195135	-3.98284	1.79302	0.451882
HL.SW.v1.0.G036019	probable plastid-lipid-associated 11 isoform X1	0.00119519	-2.56045	2.45473	0.996082
HL.SW.v1.0.G036066	translation factor SUI1 homolog 1-like	1.78968e-13	-2.33801	269.297	122.121
HL.SW.v1.0.G036069	DNA polymerase I A, chloroplastic mitochondrial	2.65599e-05	-2.43886	4.54461	1.95619
HL.SW.v1.0.G036234	hypothetical protein L484_017777	0.00187829	-3.08061	1.76012	0.58271
HL.SW.v1.0.G036248	glucose-6-phosphate isomerase, cytosolic	2.25193e-05	-2.45088	4.70397	2.01493
HL.SW.v1.0.G036323	ATP-dependent zinc metalloprotease FTSH 2, chloroplastic	1.37608e-78	-2.18605	109.916	53.3081
HL.SW.v1.0.G036330	UDP-glucose iridoid glucosyltransferase-like	0.000373191	-2.04965	4.79879	2.4653
HL.SW.v1.0.G036400	granule-bound starch synthase 1, chloroplastic amyloplastic-like	7.82002e-35	-2.2492	45.0006	21.1976
HL.SW.v1.0.G036427	methionine--tRNA ligase, chloroplastic mitochondrial	9.2762e-05	-2.06807	5.66691	2.88889
HL.SW.v1.0.G036466	fruit pKIWI502	1.06365e-31	-2.51867	33.2094	13.9619
HL.SW.v1.0.G036477	craniofacial development 1	1.22906e-09	-5.60422	3.94568	0.719087
HL.SW.v1.0.G036540	D -box ATP-dependent RNA helicase D 6	0.00293515	-3.04157	1.66028	0.55578
HL.SW.v1.0.G036582	DNA-directed RNA polymerase 2B, chloroplastic mitochondrial	0.00143095	-3.80237	1.54197	0.405074
HL.SW.v1.0.G036640	DEAD-box ATP-dependent RNA helicase 3, chloroplastic	0.00109016	-2.39904	3.01136	1.31084
HL.SW.v1.0.G036668	UPF0553 -like	2.03206e-07	-5.6517	2.86893	0.510686
HL.SW.v1.0.G036734	late embryogenesis abundant At5g17165-like	8.37247e-06	-2.07017	7.10073	3.62031
HL.SW.v1.0.G036849	multiple organellar RNA editing factor 3, mitochondrial	0.00369017	-2.2199	2.88282	1.35886
HL.SW.v1.0.G036939	sulfate transporter -like	3.67861e-11	-2.45079	11.1253	4.79384
HL.SW.v1.0.G037072	KRR1 small subunit processome component homolog	0.0014706	-2.1545	3.53597	1.72171
HL.SW.v1.0.G037095	protease homolog isoform X1	7.53915e-39	-2.23785	50.7964	24.0502
HL.SW.v1.0.G037136	PREDICTED: uncharacterized protein LOC108456879 isoform X2	1.6751e-94	-3.24951	101.7	33.1686
HL.SW.v1.0.G037144	protein TIC 20-II, chloroplastic	1.63631e-07	-2.71834	6.46885	2.50522
HL.SW.v1.0.G037156	indole-3-glycerol phosphate synthase, chloroplastic-like	4.21505e-08	-2.25407	9.09412	4.26034
HL.SW.v1.0.G037159	senescence-associated family	1.10611e-37	-2.65554	36.4315	14.5278
HL.SW.v1.0.G037448	NUCLEAR FUSION DEFECTIVE 4 isoform X1	0.000936275	-2.75458	2.41426	0.907657
HL.SW.v1.0.G037534	pentatricopeptide repeat-containing At2g15820, chloroplastic	0.00129909	-2.36536	2.85154	1.25873
HL.SW.v1.0.G037545	Sulfite oxidase	0.00051118	-2.16427	4.1059	1.99353
HL.SW.v1.0.G037649	hypothetical protein L484_002050	1.36323e-13	-2.2466	17.2074	8.10577
HL.SW.v1.0.G037736	LETM1 and EF-hand domain-containing 1, mitochondrial-like	0.000274664	-8.96261	1.06262	0.0953747
HL.SW.v1.0.G037761	uridine kinase 3	1.47477e-09	-2.66584	7.96351	3.14698
HL.SW.v1.0.G037807	Encodes a root meristem growth factor, Belongs to a family of functionally redundant ous peptides that are secreted,	0.00383845	-2.38722	2.49729	1.08913
HL.SW.v1.0.G037874	Hippocampus abundant transcript 1	1.28207e-14	-2.07245	20.7509	10.6006
HL.SW.v1.0.G037876	Mitochondrial import ZIM17	1.23569e-30	-2.21234	40.9319	19.6021
HL.SW.v1.0.G037919	UPF0187 At3g61320, chloroplastic-like	9.29539e-11	-4.79341	4.85445	1.04678
HL.SW.v1.0.G037923	12-oxophytodienoate reductase 11	3.3955e-08	-2.184	9.8107	4.74515
HL.SW.v1.0.G037936	dehydrodolichyl diphosphate synthase 6-like	0.000752929	-3.53035	1.90968	0.548808
HL.SW.v1.0.G037984	ACT domain-containing ACR9-like	0.00260229	-2.45933	2.34052	0.988934
HL.SW.v1.0.G038039	UV radiation resistance autophagy-related 14	1.26728e-06	-2.23285	7.08603	3.34536
HL.SW.v1.0.G038043	gamma-soluble NSF attachment	0	-2.0686	931.263	477.409
HL.SW.v1.0.G038061	myosin-1-like isoform X1	4.05966e-06	-2.66628	4.89656	1.92648
HL.SW.v1.0.G038083	pericentriolar material 1	5.13216e-12	-3.41015	7.56766	2.32918
HL.SW.v1.0.G038093	isoform X1	1.40256e-07	-2.5632	6.71186	2.75601
HL.SW.v1.0.G038117	serine threonine- phosphatase 6 regulatory subunit 3	0.000773292	-2.04547	4.30687	2.21583
HL.SW.v1.0.G038213	malate dehydrogenase, glyoxysomal	4.50033e-54	-2.02217	89.0019	46.6603
HL.SW.v1.0.G038296	glycine-rich RNA-binding 2, mitochondrial-like	4.00075e-56	-2.80305	50.6022	19.1234
HL.SW.v1.0.G038331	vicianin hydrolase-like	2.55136e-06	-2.55578	5.2516	2.15843
HL.SW.v1.0.G038448	histone-lysine N-methyltransferase setd3	9.7688e-12	-2.83782	9.33625	3.46563
HL.SW.v1.0.G038480	Eukaryotic peptide chain release factor subunit 1-3	5.95352e-23	-2.34581	26.5649	11.9894
HL.SW.v1.0.G038487	Asparagine--tRNA ligase, cytoplasmic 1	0.0014095	-2.10063	3.70237	1.85072
HL.SW.v1.0.G038541	E3 ubiquitin- ligase RHF2A-like	7.78198e-12	-2.06934	16.5956	8.48489
HL.SW.v1.0.G038625	phytochrome-interacting ankyrin-repeat 2-like	3.18389e-15	-2.15375	20.1258	9.89274
HL.SW.v1.0.G038637	Tetratricopeptide repeat (TPR)-like superfamily , isoform 1	0.000584406	-2.66232	2.77291	1.08324
HL.SW.v1.0.G038669	superoxide dismutase [Fe], chloroplastic isoform X2	1.02619e-13	-2.44818	14.1239	6.09845
HL.SW.v1.0.G038676	AT2G31890 , partial	3.94536e-24	-6.23732	9.98378	1.66953
HL.SW.v1.0.G038917	T-complex 1 subunit alpha	1.50385e-11	-2.65621	10.1062	4.01381
HL.SW.v1.0.G038932	ferredoxin-3, chloroplastic	3.77232e-29	-2.21294	38.5064	18.4351
HL.SW.v1.0.G038975	acetylglutamate kinase, chloroplastic	5.40069e-14	-2.01557	21.4933	11.2941
HL.SW.v1.0.G038988	adenine phosphoribosyltransferase 3	9.62431e-18	-2.39703	19.3985	8.56207
HL.SW.v1.0.G039018	rhodanese-like domain-containing 4A, chloroplastic	9.5694e-06	-2.1917	6.28788	3.02378
HL.SW.v1.0.G039062	Thermospermine synthase ACAULIS5	1.38642e-06	-2.64065	5.27045	2.09526
HL.SW.v1.0.G039070	remorin	2.63789e-30	-2.41977	33.9634	14.8616
HL.SW.v1.0.G039106	hypothetical protein L484_004347	0.00087794	-4.04034	1.64181	0.405395
HL.SW.v1.0.G039130	Acylphosphatase family isoform 1	3.28796e-11	-2.43791	11.4384	4.95474
HL.SW.v1.0.G039172	PREDICTED: uncharacterized protein LOC105977141	0.000297584	-2.17143	4.50127	2.18044
HL.SW.v1.0.G039204	transcription factor bHLH121	2.26037e-08	-2.13576	10.481	5.18643
HL.SW.v1.0.G039231	RING-H2 finger ATL66-like	5.70694e-14	-4.78742	6.53063	1.41934
HL.SW.v1.0.G039234	Gibberellin 2-beta-dioxygenase	0.00432416	-2.66957	1.91925	0.741381
HL.SW.v1.0.G039235	UPF0481 At3g47200-like	0.00187829	-3.31287	1.74482	0.534873
HL.SW.v1.0.G039240	Nitrate reductase [NADH]	4.126e-05	-4.68758	2.0349	0.433303
HL.SW.v1.0.G039298	periodic tryptophan 1 homolog	1.30004e-08	-2.25767	9.62375	4.50112
HL.SW.v1.0.G039314	U-box domain-containing 44-like	3.44248e-18	-3.83474	10.5353	2.88858
HL.SW.v1.0.G039327	serine threonine- kinase CTR1	0.000198053	-3.04713	2.52449	0.856046
HL.SW.v1.0.G039351	probable polyribonucleotide nucleotidyltransferase 1, chloroplastic	0.000198053	-3.08728	2.56186	0.856955
HL.SW.v1.0.G039370	gamma-interferon-inducible lysosomal thiol reductase isoform X1	1.05875e-32	-2.64876	31.8764	12.7411
HL.SW.v1.0.G039374	accelerated cell death 11	3.07923e-19	-2.25335	23.8227	11.1927
HL.SW.v1.0.G039414	Dehydrodolichyl diphosphate synthase 2	1.21154e-188	-11.1857	51.3876	4.84114
HL.SW.v1.0.G039427	plastocyanin, chloroplastic	0	-2.59761	244.322	99.7259
HL.SW.v1.0.G039475	DNA-directed RNA polymerases II, IV and V subunit 6A-like	1.28902e-07	-2.1638	9.18183	4.48107
HL.SW.v1.0.G039581	hypothetical protein L484_015234	0.00105618	-2.12848	3.55977	1.75536
HL.SW.v1.0.G039646	threonine--tRNA ligase, chloroplastic mitochondrial 2	2.63934e-19	-2.5467	19.1588	7.95765
HL.SW.v1.0.G039682	SCAI	1.48108e-08	-3.33554	5.19349	1.62645
HL.SW.v1.0.G039880	probable inactive ATP-dependent zinc metalloprotease FTSHI 1, chloroplastic	0.000170165	-3.63752	2.22506	0.623562
HL.SW.v1.0.G039981	uncharacterized protein LOC18782382 isoform X2	0.000116848	-4.75587	1.87436	0.391058
HL.SW.v1.0.G039983	28 kDa ribonucleo , chloroplastic-like	2.22045e-15	-2.60147	182.216	74.2599
HL.SW.v1.0.G040018	aspartate, glycine, lysine and serine-rich	3.29132e-102	-3.08887	83.2213	28.5498
HL.SW.v1.0.G040027	pyruvate, phosphate dikinase, chloroplastic	2.33449e-18	-2.14683	24.9543	12.3086
HL.SW.v1.0.G040060	ribonucleoside-diphosphate reductase large subunit	4.69273e-07	-2.56849	6.19728	2.53844
HL.SW.v1.0.G040088	RNA-binding protein 48	9.65543e-05	-2.63329	3.48577	1.38263
HL.SW.v1.0.G040111	protein curvature thylakoid chloroplastic	2.88973e-07	-2.80548	5.53455	2.07052
HL.SW.v1.0.G040139	succinate dehydrogenase subunit 4 family	1.01544e-07	-2.50223	6.93266	2.91813
HL.SW.v1.0.G040169	glutamate--tRNA ligase, chloroplastic mitochondrial	0.000881343	-2.15806	3.69672	1.79823
HL.SW.v1.0.G040323	elongation factor 1-delta-like	4.47714e-29	-2.25206	37.2984	17.5431
HL.SW.v1.0.G040331	beta-glucosidase 44-like	0.00195314	-20.575	0.631952	0
HL.SW.v1.0.G040498	Eukaryotic translation initiation factor 3 subunit K	5.83593e-05	-2.01507	6.29268	3.29455
HL.SW.v1.0.G040524	transcription factor bHLH128	0.0039333	-2.93661	1.77766	0.619552
HL.SW.v1.0.G040537	mRNA-capping enzyme isoform X1	1.36878e-06	-2.06275	8.59426	4.40188
HL.SW.v1.0.G040621	GTP diphosphokinase RSH1, chloroplastic	1.94278e-14	-2.25858	17.2808	8.0953
HL.SW.v1.0.G040625	Cellulose synthase H1	3.23685e-23	-5.87858	9.6878	1.71939
HL.SW.v1.0.G040632	ATP synthase gamma chain, chloroplastic	0	-2.58892	262.08	107.33
HL.SW.v1.0.G040716	ATP synthase I-related , partial	1.10024e-123	-4.69085	50.2334	11.3335
HL.SW.v1.0.G040783	40S ribosomal S15a-1	8.6376e-61	-2.21055	106.008	50.8435
HL.SW.v1.0.G040792	bZIP transcription factor 53-like	0.000535615	-3.10419	2.3001	0.762837
HL.SW.v1.0.G040824	hypothetical protein L484_023156	0.00154726	-2.4726	2.71796	1.14557
HL.SW.v1.0.G040834	glutathione peroxidase	1.53607e-06	-3.33932	3.68337	1.14662
HL.SW.v1.0.G041114	AMT1 2	2.61116e-11	-2.26915	12.8412	5.98266
HL.SW.v1.0.G041304	RNA polymerase beta (chloroplast)	0.00027717	-5.5553	1.35425	0.230528
HL.SW.v1.0.G041404	altered inheritance of mitochondria 32	6.71612e-17	-2.41135	18.0461	7.91699
HL.SW.v1.0.G041602	epimerase family SDR39U1 homolog, chloroplastic	2.86658e-12	-2.34357	13.371	6.03065
HL.SW.v1.0.G041677	ketol-acid reductoisomerase, chloroplastic	4.34737e-38	-2.26792	48.4921	22.6584
HL.SW.v1.0.G041711	60S ribosomal L37a	6.71683e-40	-2.80868	42.3203	15.9531
HL.SW.v1.0.G041716	SUPPRESSOR OF MAX2 1	0.000314154	-2.35904	3.49923	1.55339
HL.SW.v1.0.G041789	NADH dehydrogenase [ubiquinone] complex I, assembly factor 7 homolog	0.00210247	-3.36243	1.61538	0.485303
HL.SW.v1.0.G041862	proline-, glutamic acid- and leucine-rich 1 isoform X1	0.00456175	-2.19503	2.50944	1.19374
HL.SW.v1.0.G041960	probable bifunctional methylthioribulose-1-phosphate dehydratase enolase-phosphatase E1 isoform X1	4.66194e-47	-2.02531	76.6744	40.1301
HL.SW.v1.0.G041981	S3 self-incompatibility locus-linked pollen isoform 1	4.06386e-06	-2.60407	4.84863	1.95434
HL.SW.v1.0.G041995	ammonium transporter 1 member 2	1.93037e-34	-2.34368	41.0054	18.5342
HL.SW.v1.0.G042042	BEL1-like homeodomain 6	8.02228e-06	-2.18293	6.41141	3.09609
HL.SW.v1.0.G042050	long chain acyl- synthetase 8-like	0.000122553	-6.26323	1.66508	0.252328
HL.SW.v1.0.G042067	PREDICTED: uncharacterized protein LOC109010757	8.87882e-10	-2.01082	14.2016	7.47172
HL.SW.v1.0.G042084	Polyadenylate-binding RBP45B	4.81548e-12	-2.20635	313.387	150.614
HL.SW.v1.0.G042233	NADH-plastoquinone oxidoreductase subunit 3 (chloroplast)	4.69146e-34	-3.63283	20.448	5.94246
HL.SW.v1.0.G042264	probable phosphatase 2C 58	3.01691e-24	-2.58389	24.0101	9.83293
HL.SW.v1.0.G042284	DNA mismatch repair MSH4	0.00341801	-7.2298	0.802537	0.0881511
HL.SW.v1.0.G042303	inactive purple acid phosphatase 1	9.84957e-05	-3.51498	2.42635	0.707814
HL.SW.v1.0.G042343	ATP-dependent Clp protease proteolytic subunit-related 1, chloroplastic	1.49498e-16	-2.44956	17.4091	7.51661
HL.SW.v1.0.G042344	mitotic checkpoint protein	2.04256e-57	-3.35798	41.1011	12.9548
HL.SW.v1.0.G042418	acyl-activating enzyme 18	0.00027717	-6.86978	1.35937	0.180637
HL.SW.v1.0.G042476	symplekin isoform X3	0.000478099	-2.00061	4.92057	2.59079
HL.SW.v1.0.G042494	hypothetical protein L484_023570	0.000156427	-3.37769	2.34089	0.711094
HL.SW.v1.0.G042699	ubiquitin-40S ribosomal S27a-like	2.07566e-91	-2.94852	76.9359	27.6498
HL.SW.v1.0.G042755	Dof zinc finger	0.000584406	-2.60328	2.77973	1.11219
HL.SW.v1.0.G042794	diaminopimelate decarboxylase 2, chloroplastic-like	5.63475e-09	-2.51037	8.37453	3.51651
HL.SW.v1.0.G042899	probable plastid-lipid-associated 12, chloroplastic	2.25611e-08	-2.80828	6.38359	2.38836
HL.SW.v1.0.G042956	phytoene dehydrogenase, chloroplastic chromoplastic	6.12988e-14	-2.04594	20.216	10.4625
HL.SW.v1.0.G043022	receptor-interacting ,	0.00182597	-2.16443	3.16009	1.53075
HL.SW.v1.0.G043076	TATA-box-binding -like	0.000208614	-2.59628	3.36446	1.35311
HL.SW.v1.0.G043146	Transducin beta 3	1.47391e-05	-4.00671	2.68039	0.683106
HL.SW.v1.0.G043173	Hypersensitive-induced response 4	0.000685609	-2.72973	2.64706	1.00732
HL.SW.v1.0.G043209	ABC transporter D family member 2, chloroplastic	0.000940718	-3.08461	2.10154	0.699381
HL.SW.v1.0.G043214	probable phosphatase 2C 34	2.12439e-06	-2.31623	6.48563	2.95019
HL.SW.v1.0.G043218	WAT1-related At2g37460	1.73338e-30	-7.59621	11.3096	1.54925
HL.SW.v1.0.G043266	PREDICTED: uncharacterized protein LOC108996497 isoform X2	0.00030697	-2.77923	2.76703	1.03388
HL.SW.v1.0.G043290	7-deoxyloganetin glucosyltransferase-like	6.14951e-14	-2.13333	18.5729	9.21462
HL.SW.v1.0.G043310	uncharacterized protein LOC18790525	0.000156427	-3.52819	2.3707	0.687755
HL.SW.v1.0.G043327	aldehyde dehydrogenase family 2 member B7, mitochondrial isoform X2	3.15349e-14	-2.3762	15.6351	6.95873
HL.SW.v1.0.G043382	E3 ubiquitin- ligase MARCH2-like	0.00255404	-2.137	3.10481	1.52231
HL.SW.v1.0.G043399	serine arginine-rich SC35-like splicing factor SCL30A	2.45874e-06	-2.37347	6.00088	2.66197
HL.SW.v1.0.G043442	polyadenylate-binding RBP47-like isoform X1	0.00390628	-14.1474	0.586333	0.0121525
HL.SW.v1.0.G043502	Aldehyde dehydrogenase family 2 member C4	9.2372e-43	-2.21398	57.6221	27.5798
HL.SW.v1.0.G043674	beta-fructofuranosidase, insoluble isoenzyme 1-like	4.29049e-22	-3.04678	17.0623	5.91663
HL.SW.v1.0.G043685	ubiquitin ATG12	0.000324077	-4.31784	1.74356	0.402261
HL.SW.v1.0.G043779	late embryogenesis abundant group 3	1.03341e-24	-2.59243	24.1726	9.86775
HL.SW.v1.0.G043818	Alcohol dehydrogenase class-3	2.06314e-12	-2.54493	11.9851	4.97461
HL.SW.v1.0.G043884	aldehyde dehydrogenase family 3 member H1 isoform X1	1.41167e-06	-2.43925	5.97066	2.57515
HL.SW.v1.0.G043894	mitoferrin-like	3.01058e-20	-3.39549	13.5165	4.19794
HL.SW.v1.0.G043932	Plasma membrane isoform 1	0.00233125	-2.02813	3.48884	1.80692
HL.SW.v1.0.G043992	mitochondrial import receptor subunit TOM9-2-like	0.000644761	-2.03187	4.44281	2.30043
HL.SW.v1.0.G043998	nuclease HARBI1, partial	0.00151376	-3.95359	1.42911	0.358109
HL.SW.v1.0.G044341	Cysteine-rich receptor kinase 10	0.00140946	-2.08357	3.67827	1.85496
HL.SW.v1.0.G044408	jasmonate O-methyltransferase-like	1.72761e-20	-2.554	20.2651	8.39405
HL.SW.v1.0.G044431	protochlorophyllide-dependent translocon component 52, chloroplastic-like	1.93182e-26	-21.129	6.83166	0.309985
HL.SW.v1.0.G044473	arginine biosynthesis bifunctional , chloroplastic	6.50151e-05	-2.40016	4.27539	1.86916
HL.SW.v1.0.G044495	transcription factor bHLH36-like	1.23605e-08	-3.06962	5.93516	2.02683
HL.SW.v1.0.G044536	hypothetical protein L484_022154	0.000155393	-2.36944	3.80873	1.68486
HL.SW.v1.0.G044546	CBS domain-containing CBSX6	4.16318e-24	-2.44404	26.0599	11.2865
HL.SW.v1.0.G044789	RNA exonuclease 4	9.99201e-15	-2.20196	398.887	192.094
HL.SW.v1.0.G044805	disease resistance RGA3 isoform X1	0.00210247	-3.16027	1.62332	0.521384
HL.SW.v1.0.G044890	CDGSH iron-sulfur domain-containing NEET	8.60209e-23	-3.63868	14.3889	4.16913
HL.SW.v1.0.G044959	pentatricopeptide repeat-containing At4g16470 isoform X1	0.000324077	-4.00639	1.75238	0.438046
HL.SW.v1.0.G045008	lachrymatory-factor synthase	1.08562e-06	-2.35468	6.6342	2.96779
HL.SW.v1.0.G045110	15-cis-zeta-carotene isomerase, chloroplastic	6.2896e-10	-2.28753	10.9999	5.08
HL.SW.v1.0.G045114	BOLA1, chloroplastic	3.48812e-19	-4.23312	10.3405	2.56502
HL.SW.v1.0.G045154	uncharacterized protein LOC110622981 isoform X3	4.98827e-37	-3.00871	30.1801	10.6126
HL.SW.v1.0.G045165	dirigent 22-like	6.96055e-05	-4.56701	1.9539	0.426962
HL.SW.v1.0.G045336	chaperone dnaJ 20, chloroplastic-like	2.29222e-08	-6.41811	3.08428	0.480667
HL.SW.v1.0.G045434	WAT1-related At4g08300-like	2.28173e-07	-2.58203	6.29834	2.56481
HL.SW.v1.0.G045468	ferredoxin-dependent glutamate synthase, chloroplastic	4.58146e-22	-2.01452	34.8521	18.3291
HL.SW.v1.0.G045663	ATP-dependent zinc metalloprotease FTSH 9, chloroplastic-like	7.04415e-05	-2.6091	3.74942	1.50288
HL.SW.v1.0.G045680	abscisic acid 8 -hydroxylase 3-like	0.00371926	-3.12807	1.39987	0.451159
HL.SW.v1.0.G045740	F-box LRR-repeat 14 isoform X1	0.00262654	-2.21686	2.94078	1.38764
HL.SW.v1.0.G045792	Heterogeneous nuclear ribonucleo F	2.37253e-39	-19.1488	10.3241	0.539287
HL.SW.v1.0.G045908	methyltransferase 23 isoform X2	0.0021903	-2.44183	2.44566	1.04168
HL.SW.v1.0.G046128	E3 SUMO- ligase MMS21	8.69643e-13	-2.88901	10.1355	3.69982
HL.SW.v1.0.G046409	PREDICTED: uncharacterized protein LOC8280517	1.32659e-114	-6.32949	36.1589	6.02967
HL.SW.v1.0.G046477	C-terminal S-isoprenylcysteine carboxyl O-methyltransferases	1.00929e-18	-2.15371	25.5204	12.5467
HL.SW.v1.0.G046484	aldehyde dehydrogenase family 2 member B7, mitochondrial	0	-2.53102	465.48	195.015
HL.SW.v1.0.G046496	probable small nuclear ribonucleo G	2.39535e-71	-2.44765	80.4403	34.8303
HL.SW.v1.0.G046734	zinc finger protein constans-like 2	2.59758e-12	-2.15508	15.8773	7.79448
